# Supplementary material
Source: PubMed Central journal article supplement (PMC3164318)

Supporting Information 2:

## **Regioselective Intramolecular Dipolar Cycloaddition of Azides and Unsymmetrical Alkynes**

Ryan A. Brawn, Morgan Welzel, Jason T. Lowe, and James S. Panek\*

Department of Chemistry and Center for Chemical Methodology and Library Development,  
Metcalf Center for Science and Engineering, 590 Commonwealth Avenue, Boston University,  
Boston, Massachusetts 02215

**$^1\text{H}$  and  $^{13}\text{C}$  NMR spectra for all new compounds:**

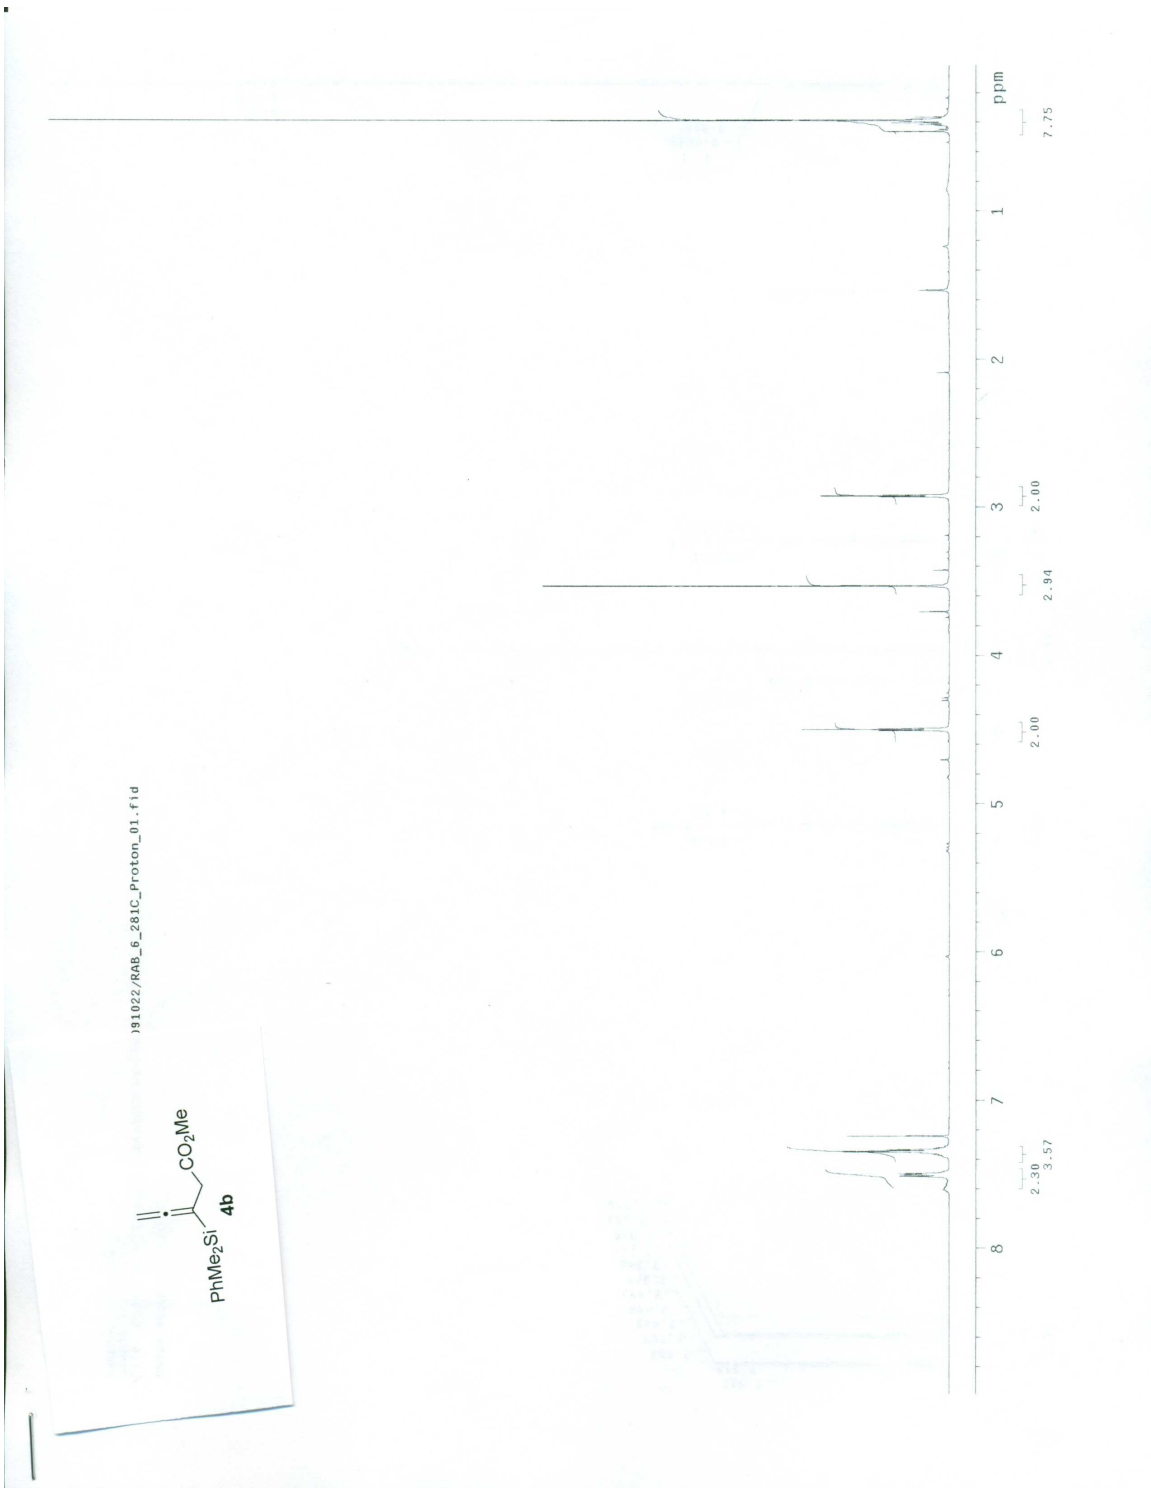

1024/RAB\_6\_281C\_Carbon\_01\_.fid

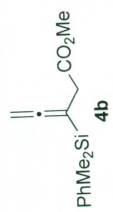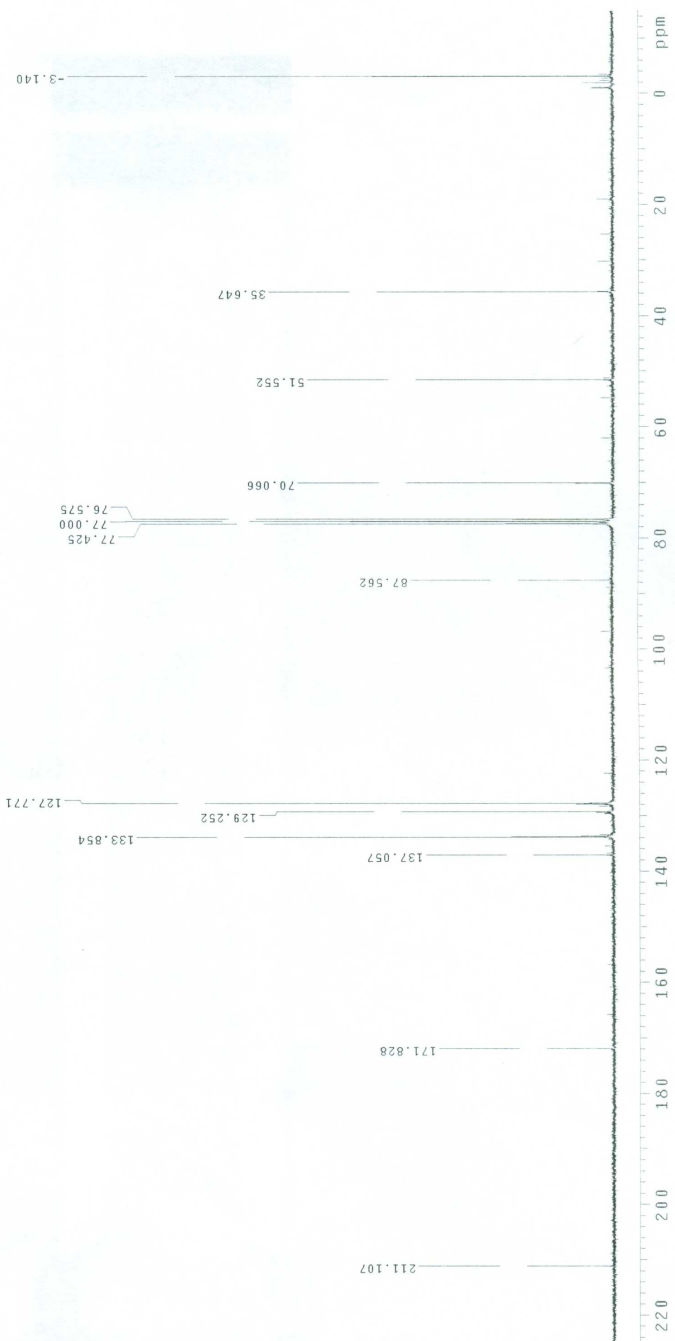

xxx  
Sample Name: xxx  
Data Collected on: c:\dmr2-mercury400  
Ar\home\walkup2\vmr\sys\data\users\jaylor\20080619  
Sample directory: xxx\_01  
FidFile: xxx\_PROTON01  
Pulse Sequence: PROTON (szpu1)  
Solvent: cdcl3  
Data collected on: Jun 19 2008

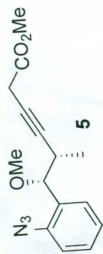

5

ppm

1

2

3

4

5

6

7

8

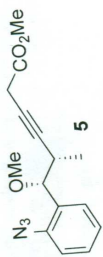

1/vnmrsys/data/studies/auto\_2007\_04.10\_02

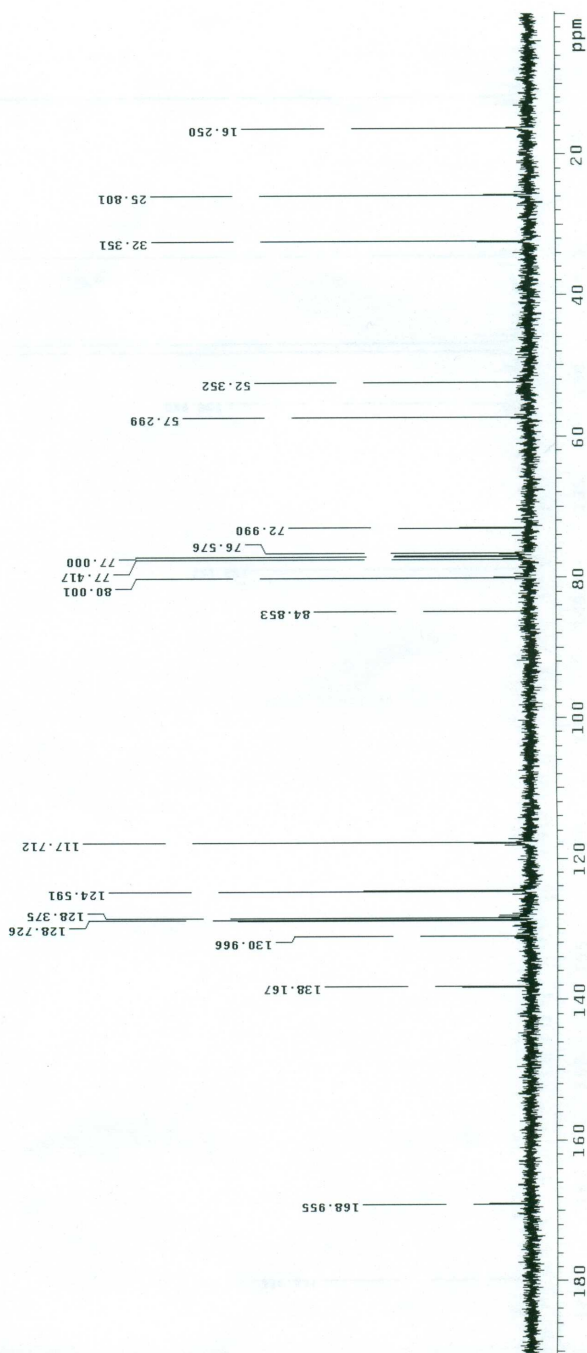

pure\_triazole\_2  
Sample Name:  
pure\_triazole\_2  
Data Collected On: 6/17/08  
Archive Directory: /home/walkup2/vnmrsws/data/users/jaylowe/20080617  
Sample Directory: pure\_triazole\_2\_01  
FID File: PROTON  
Pulse Sequence: PROTON (s2pu1)  
Solvent: cdcl3  
Data collected on: Jun 17 2008

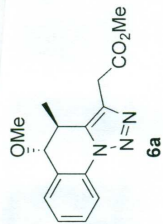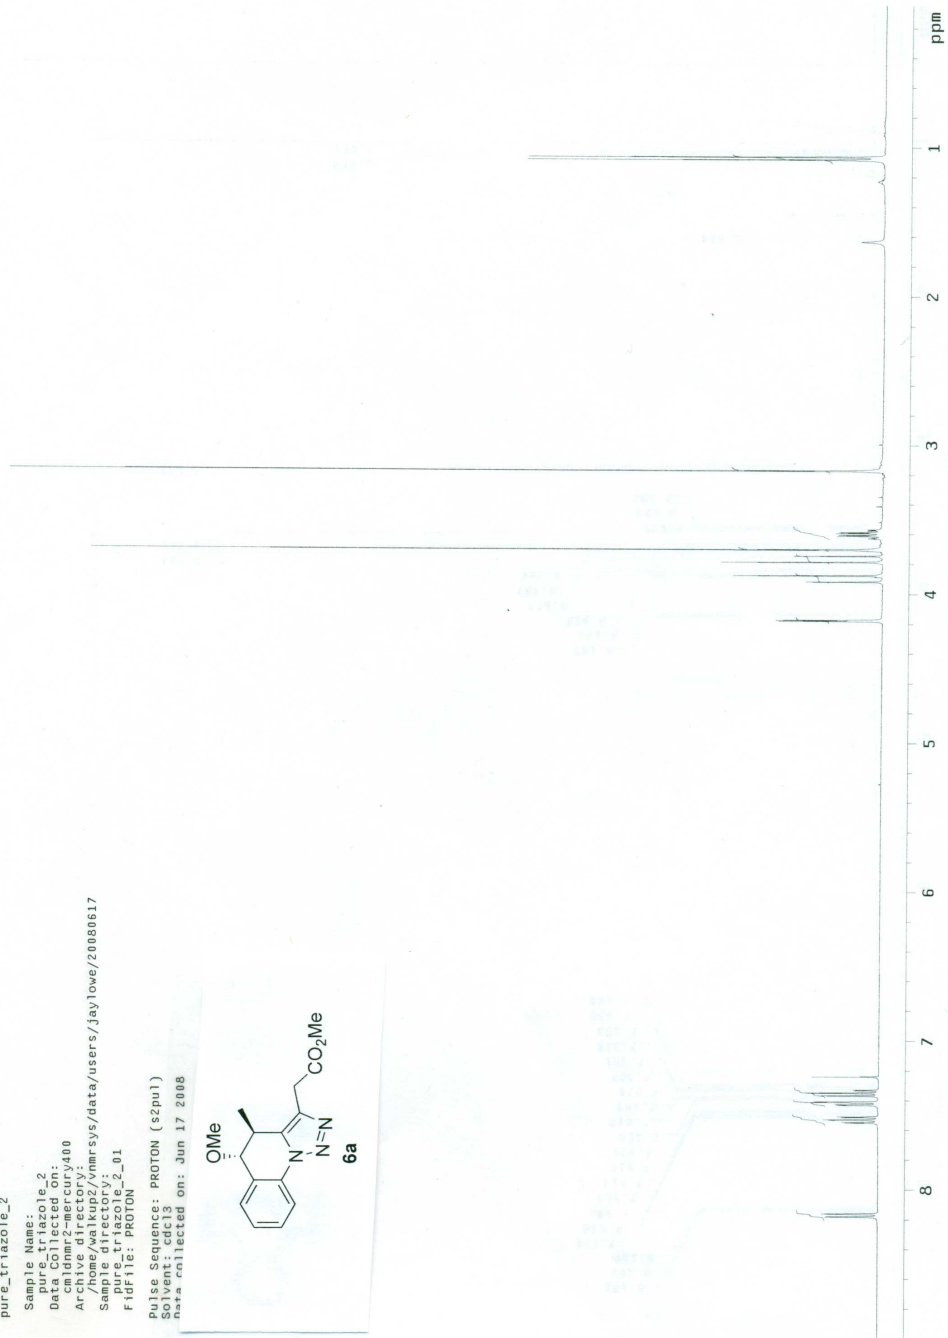

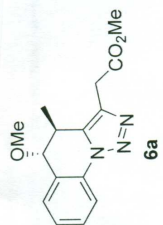

mrsys/data/studies/auto\_2007\_04\_10\_02

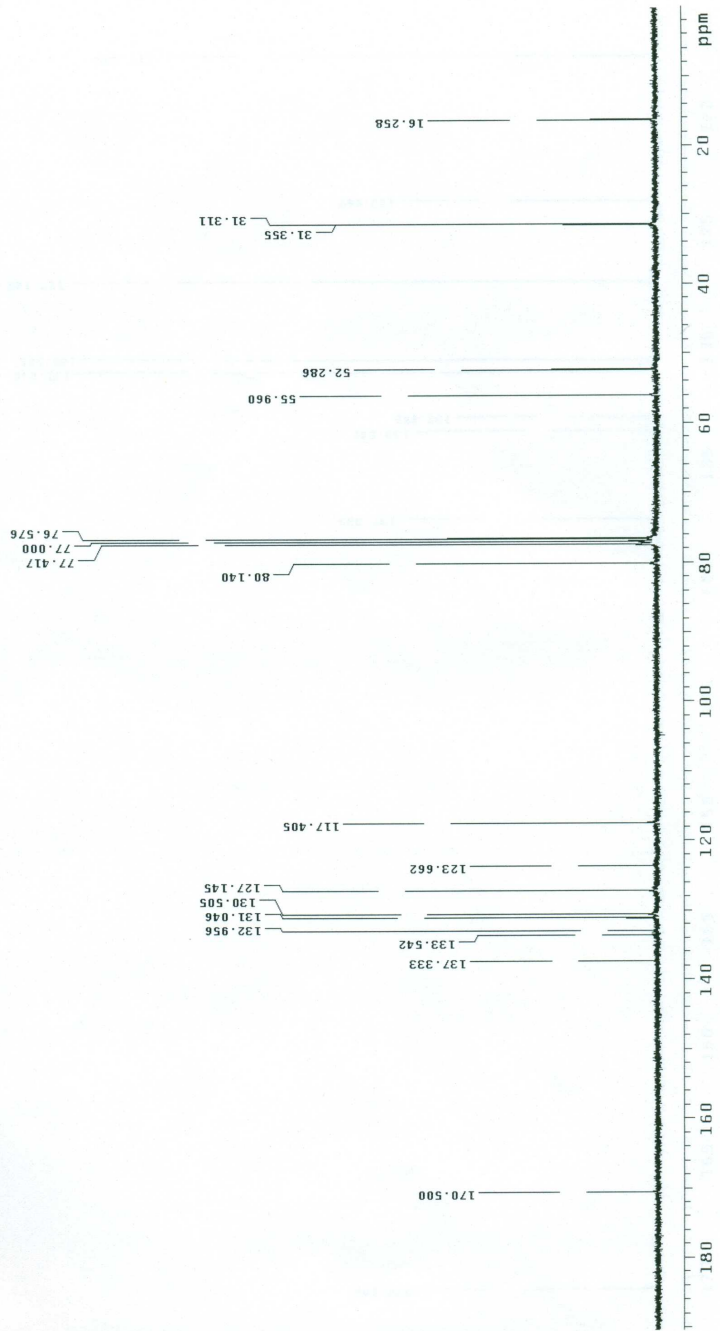

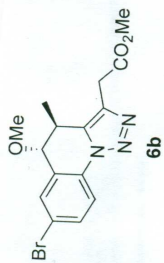

1817/RAE\_6\_1808\_Proton\_01.f1d

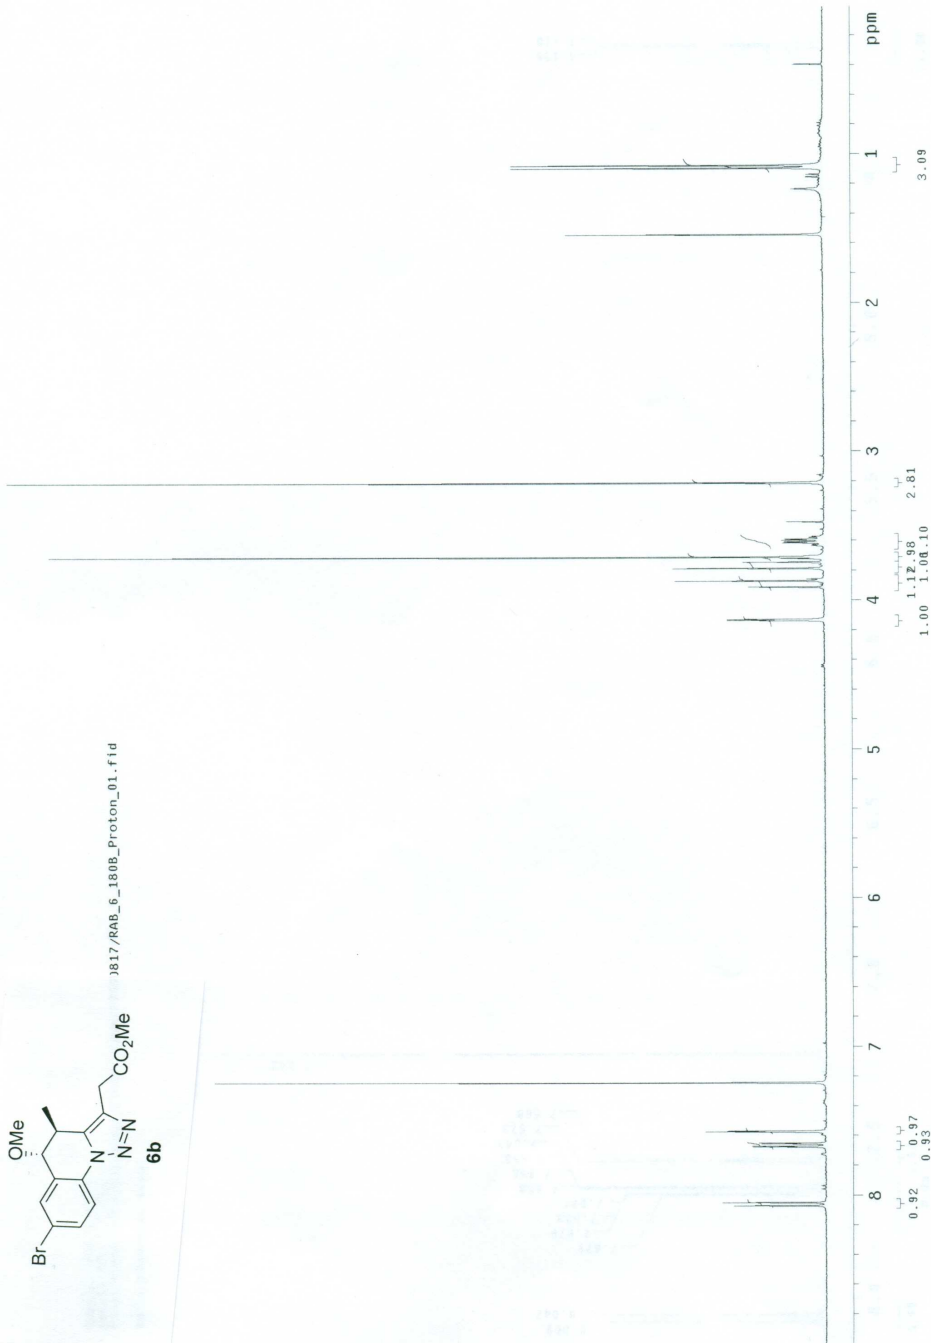



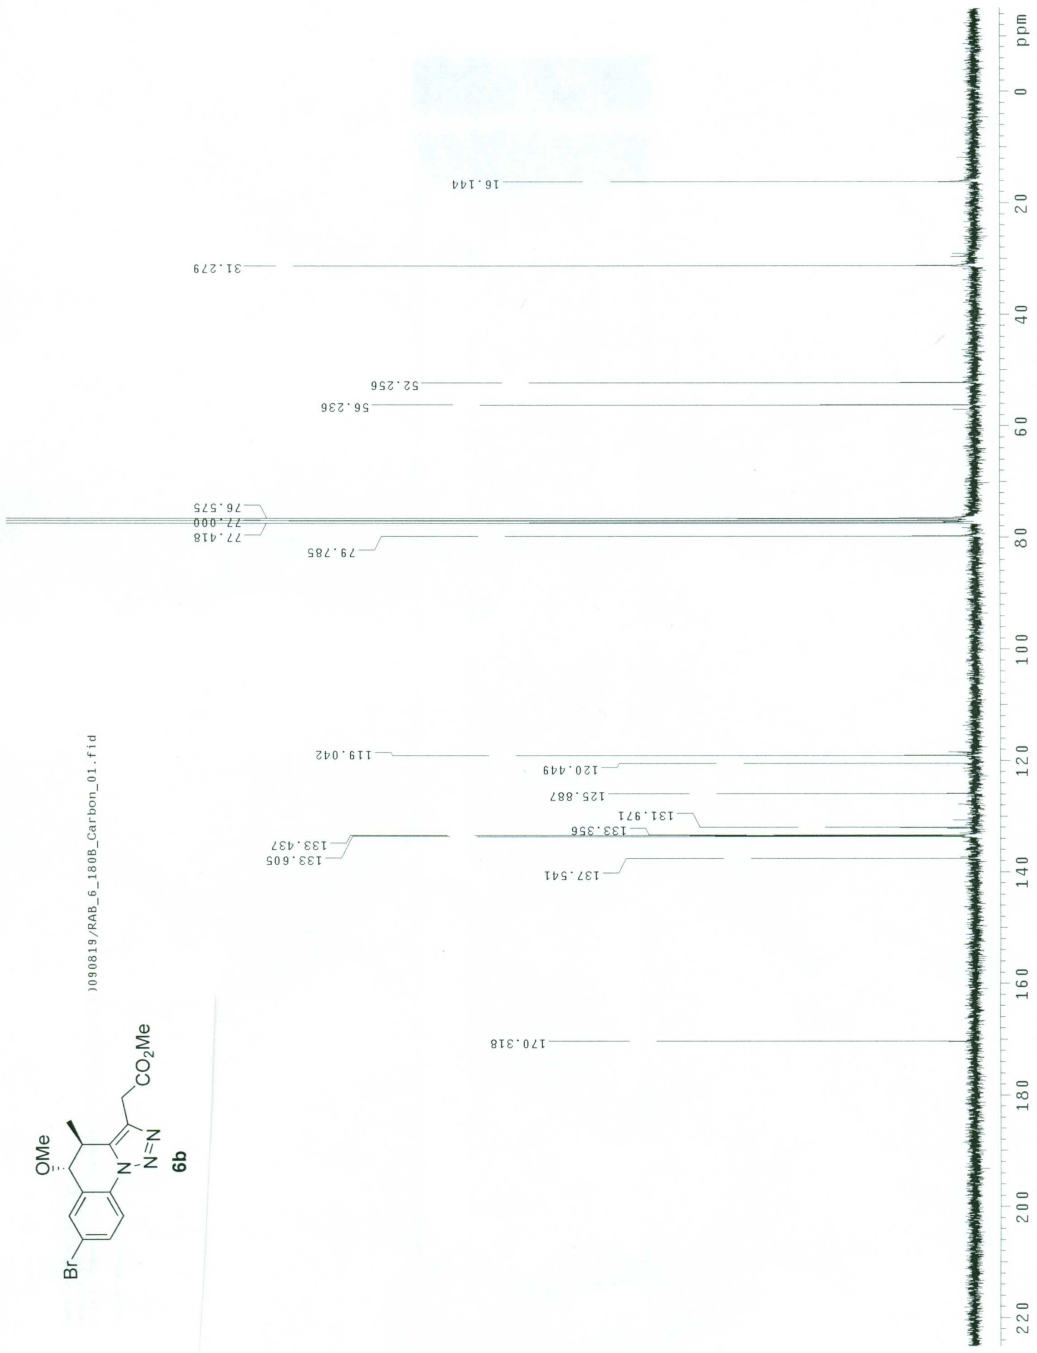

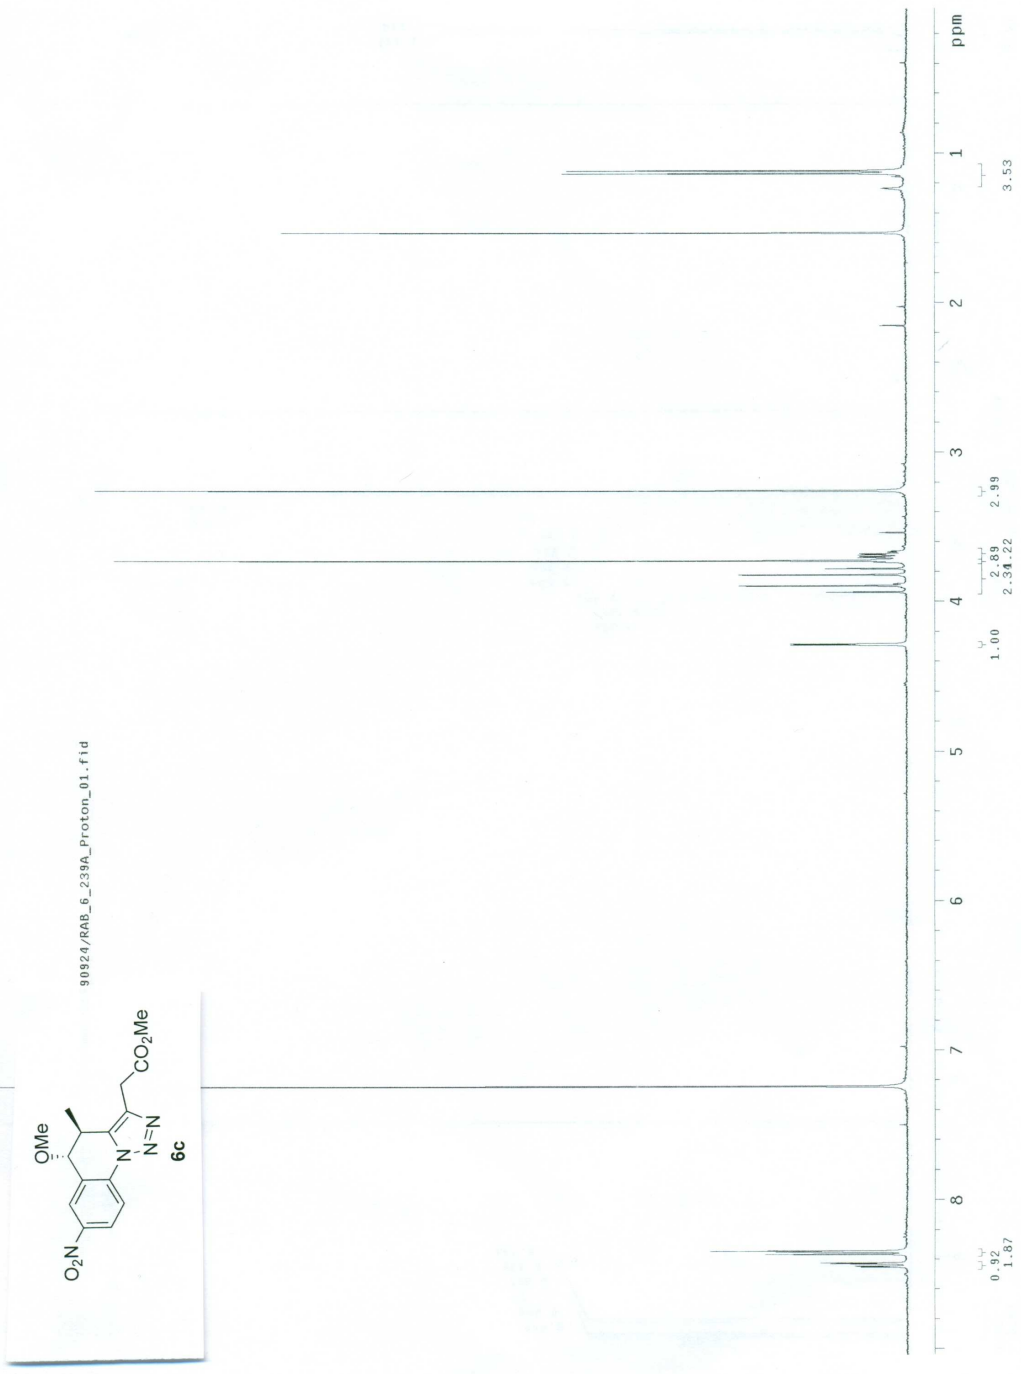

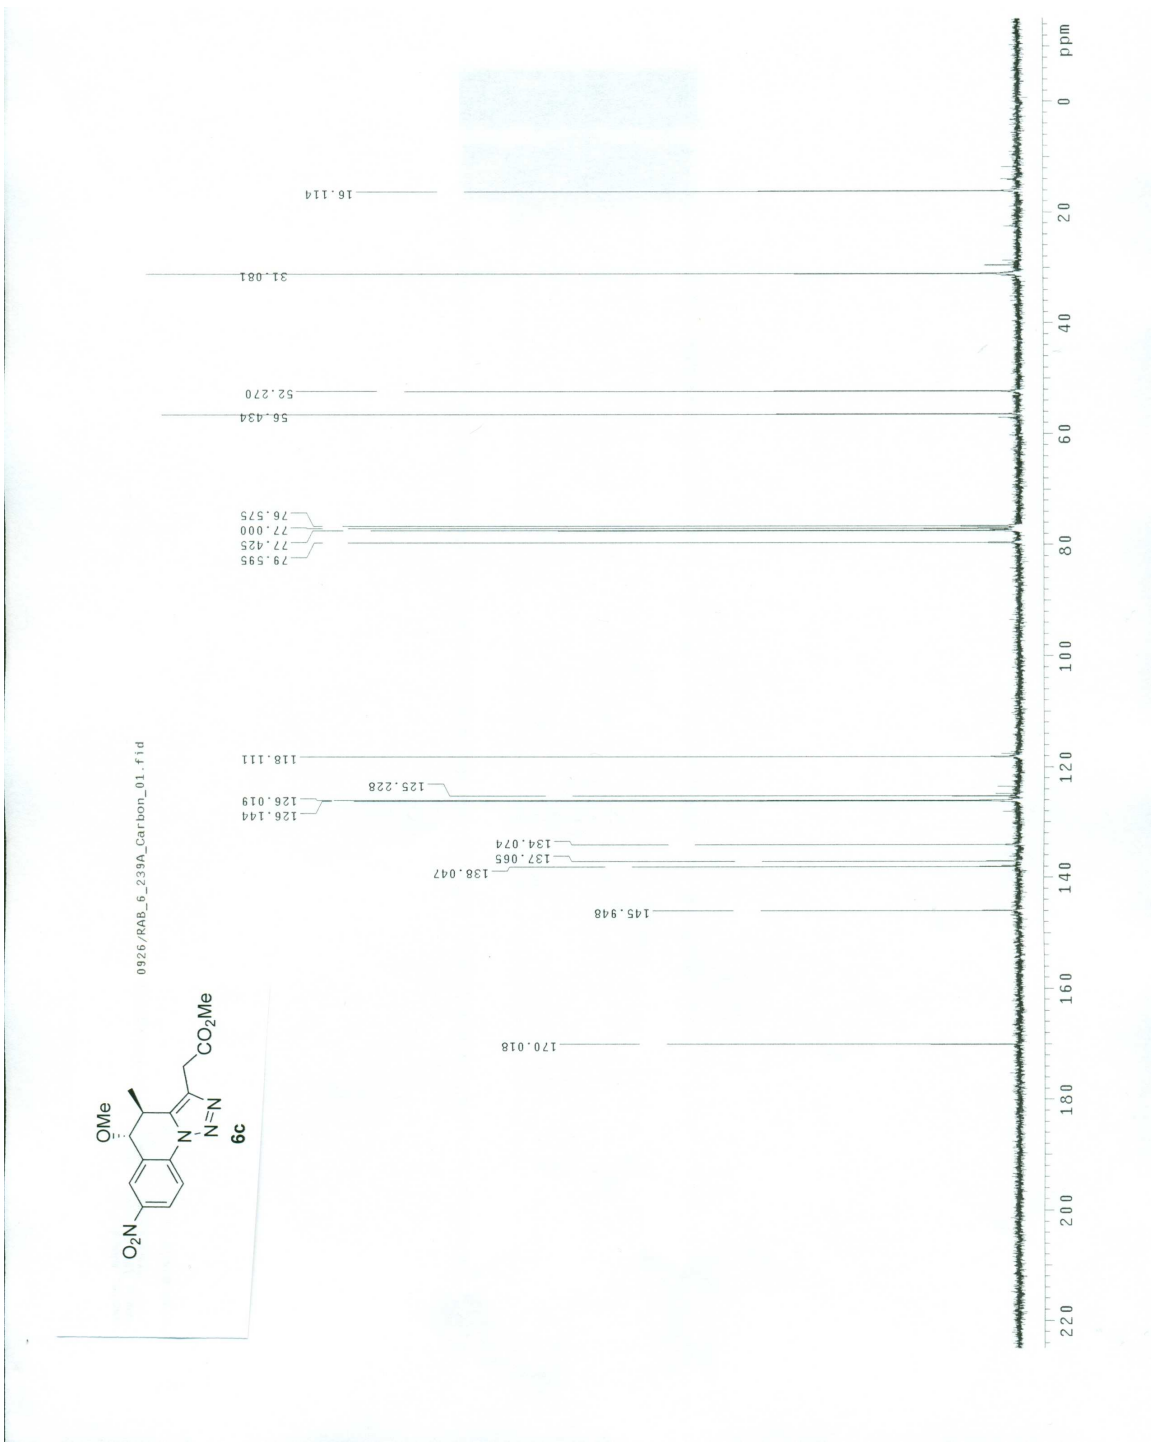

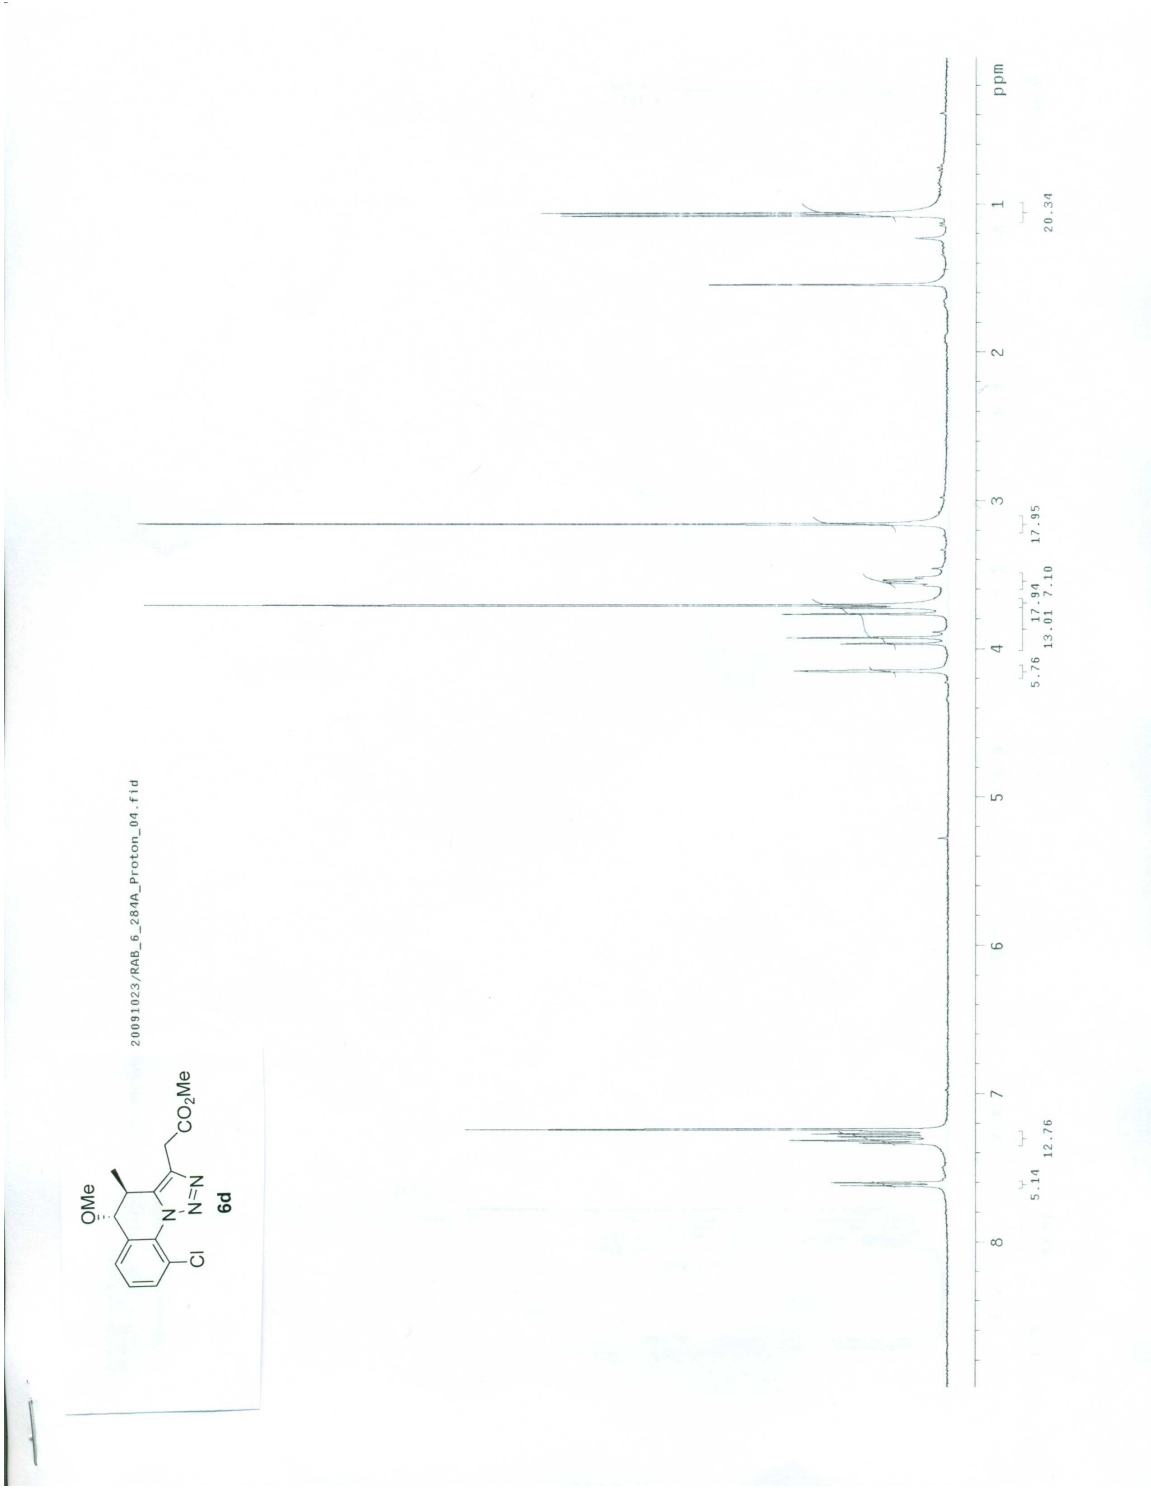

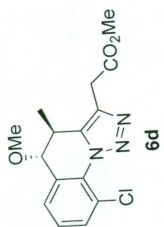

/20091024/RAB\_6\_284A\_Carbon\_01.f1d

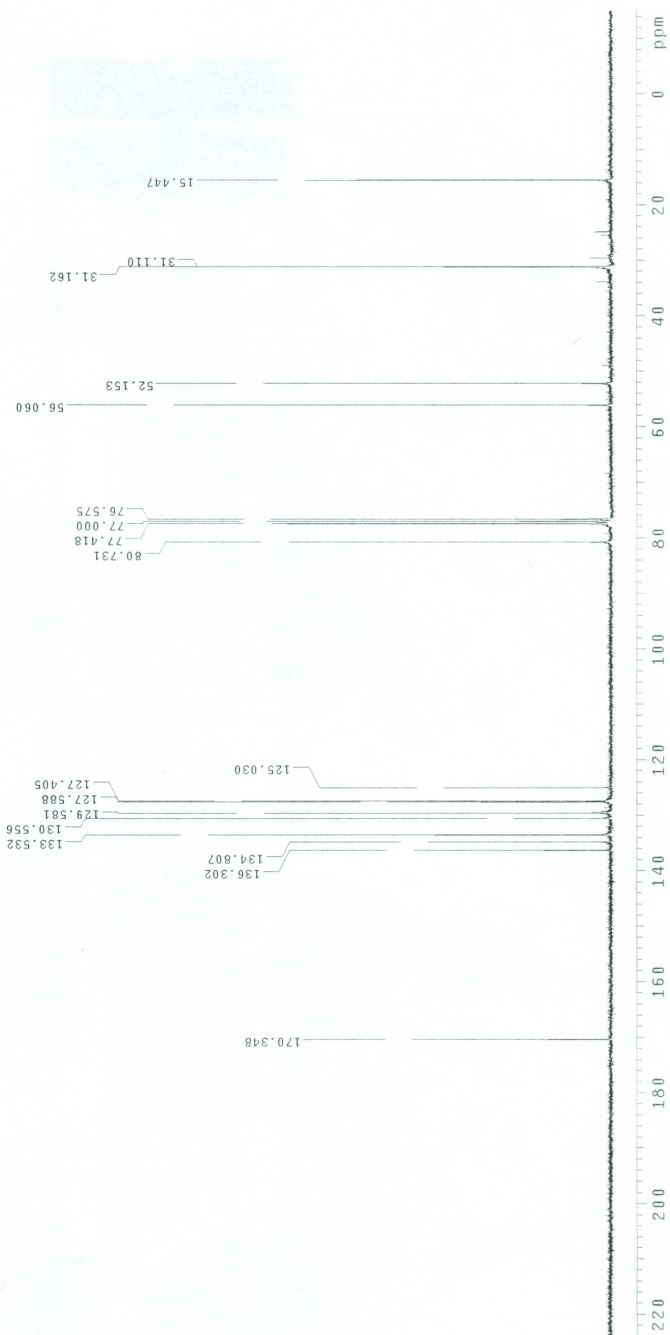

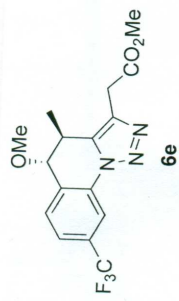

191023/RAB\_6\_284B\_Proton\_02.fid

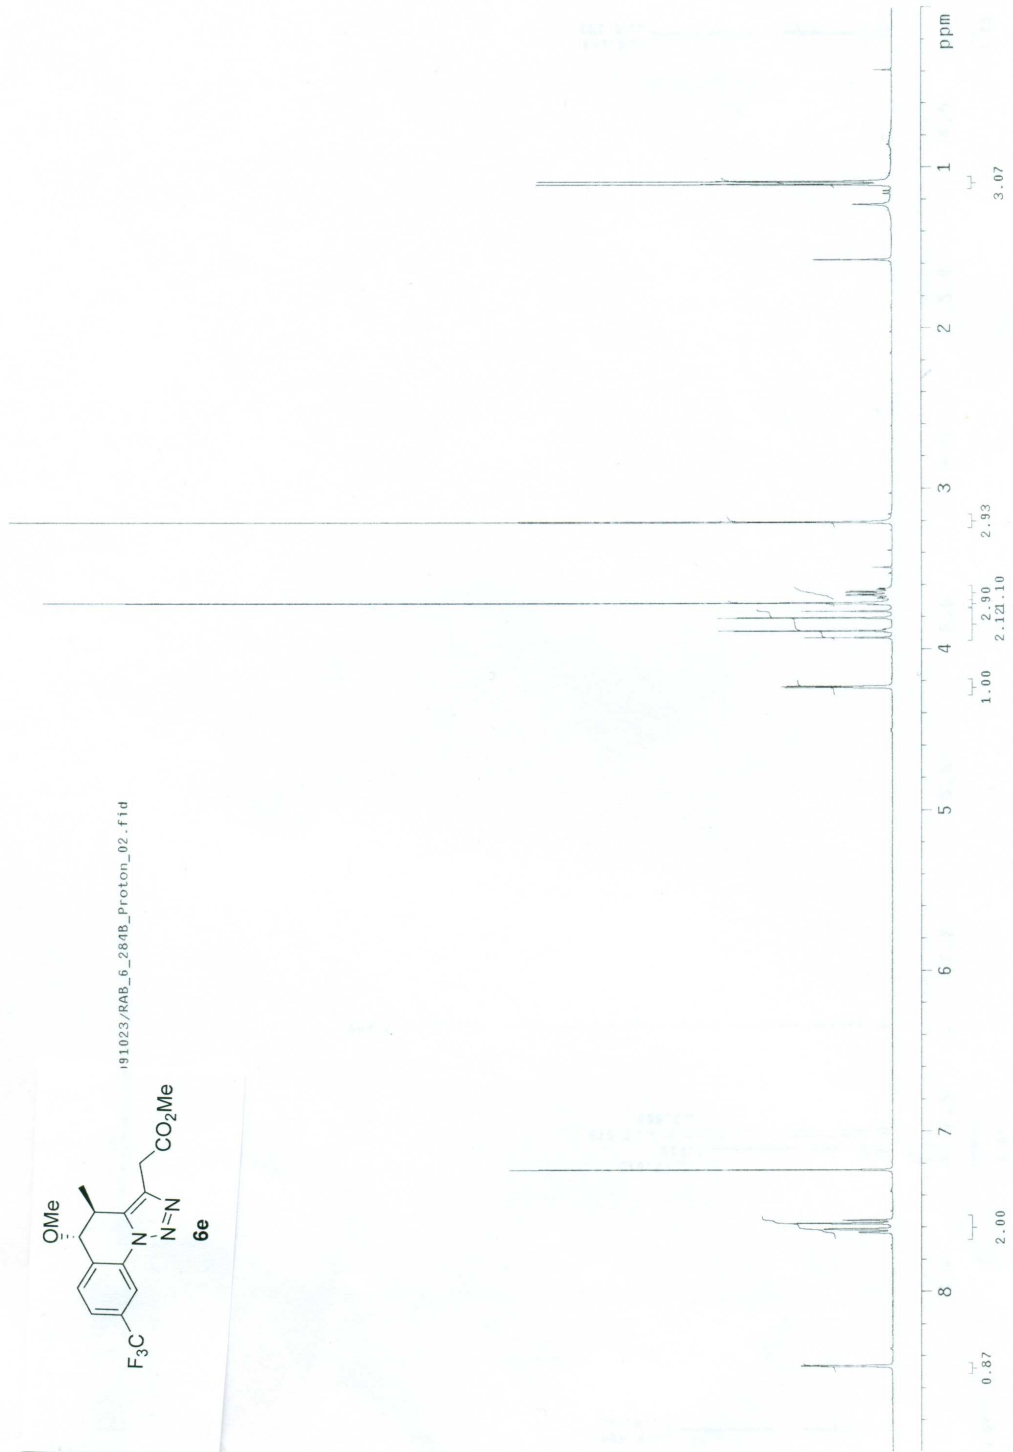

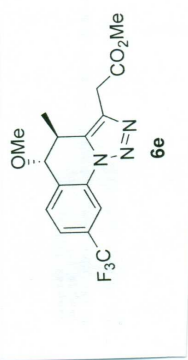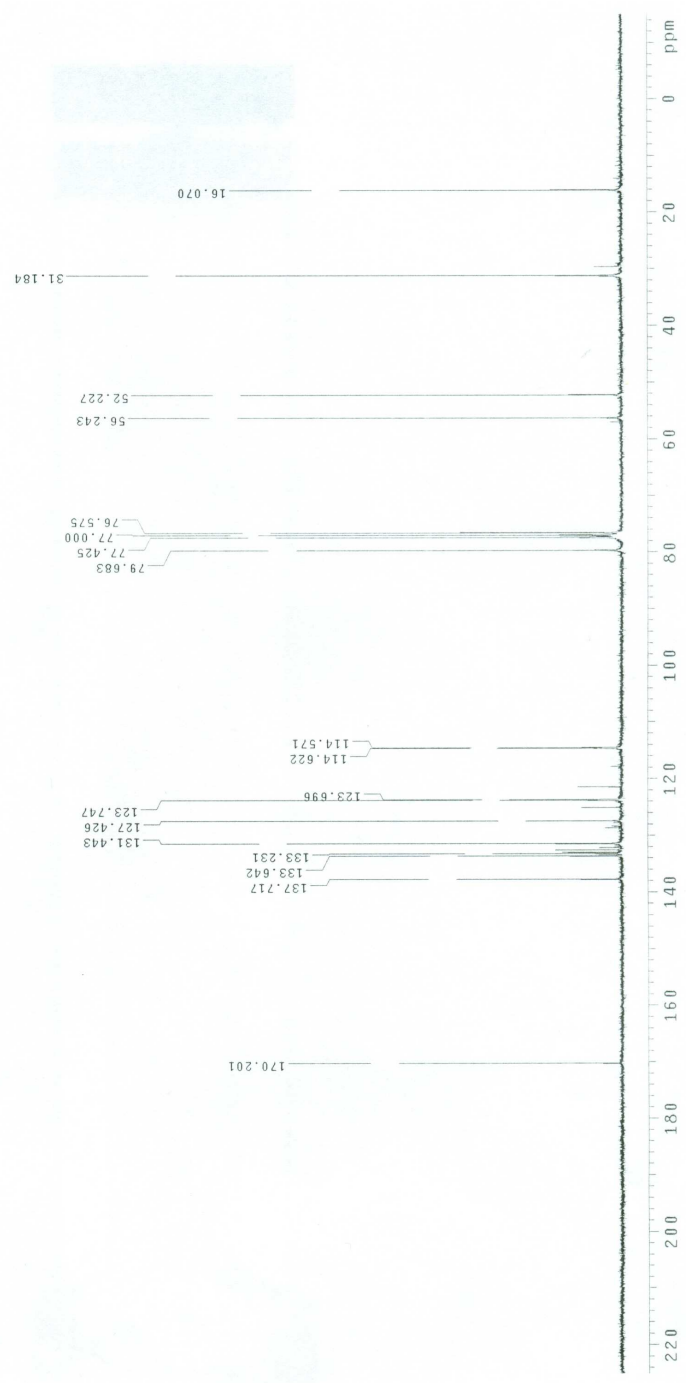

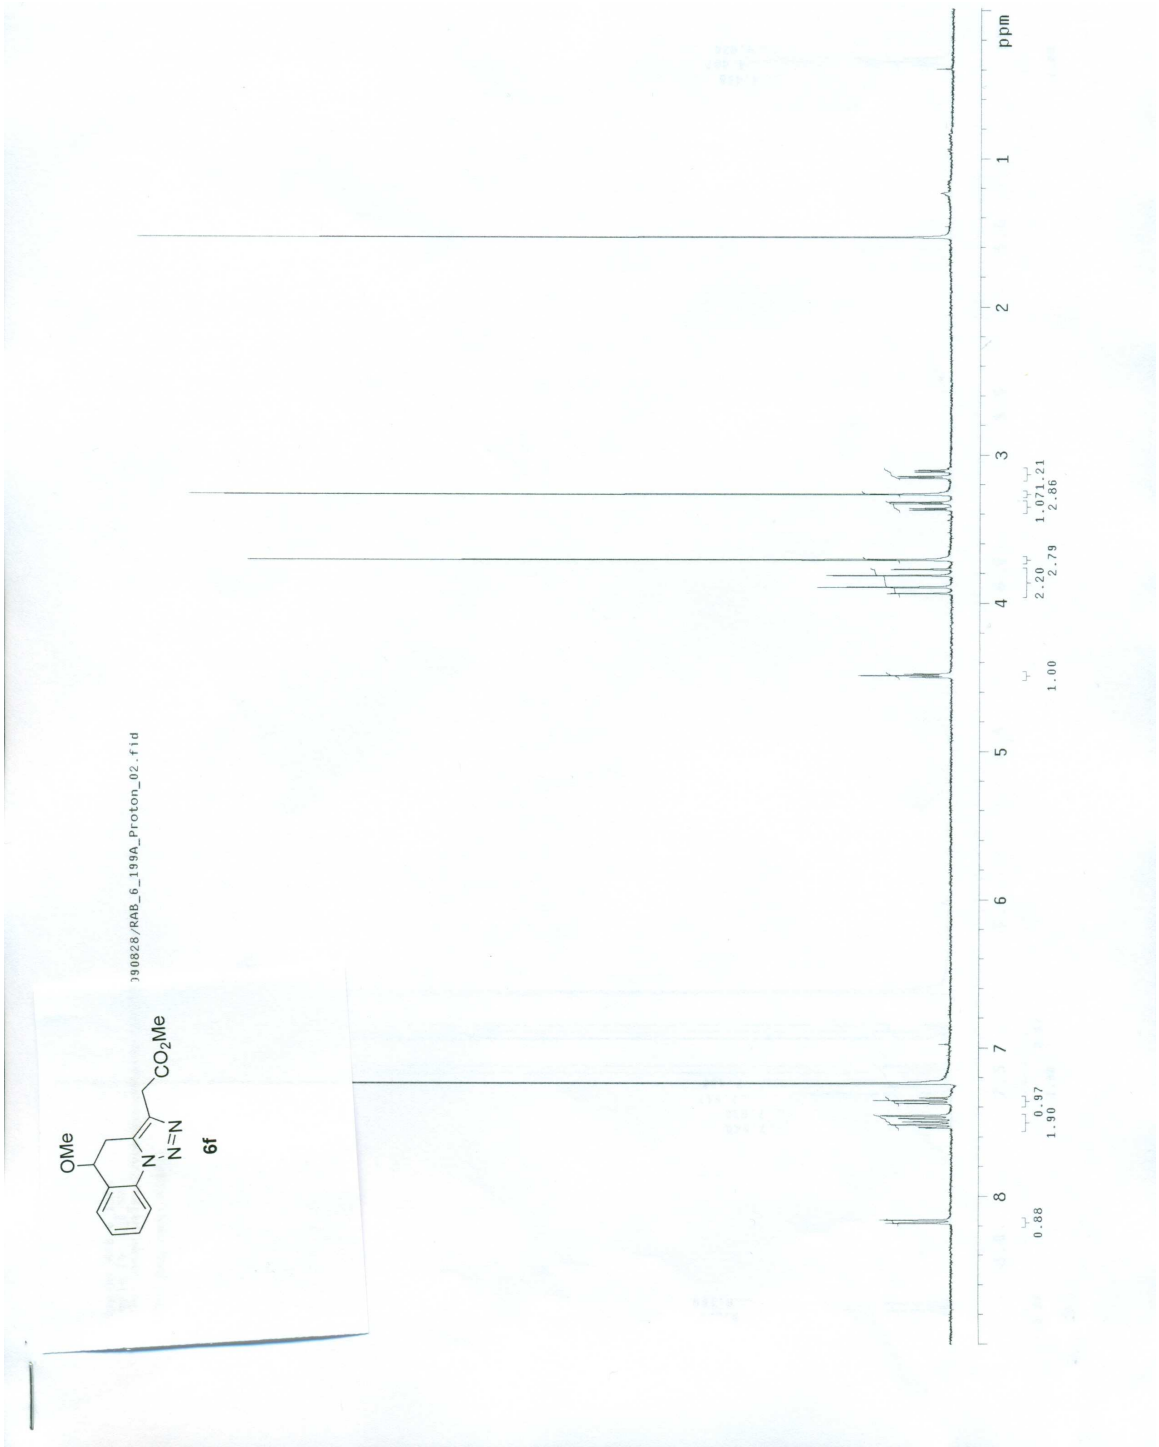



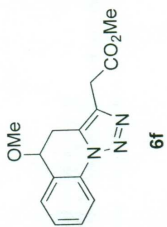

a:/brawny/20090828/RAB\_6\_199A\_Carbon\_01.fid

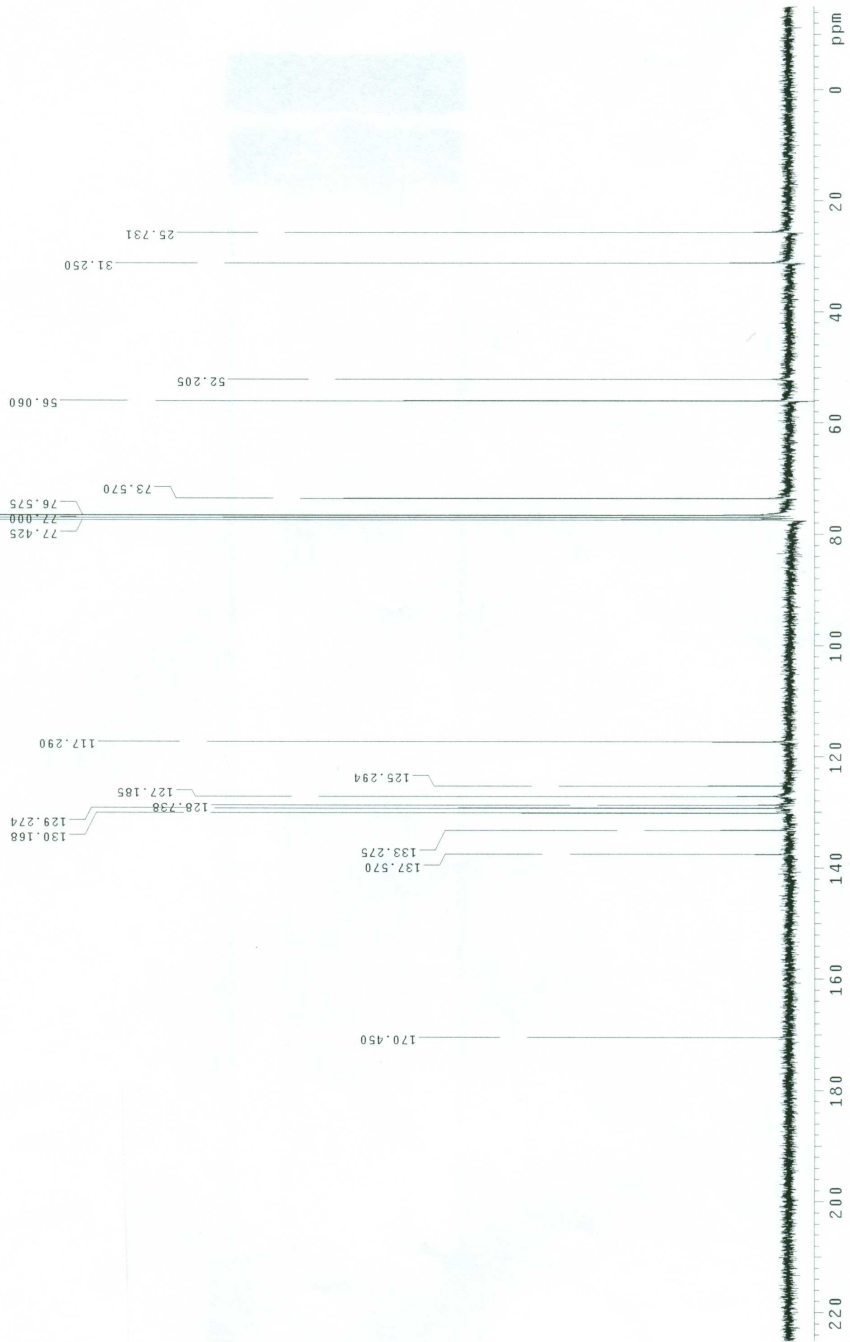

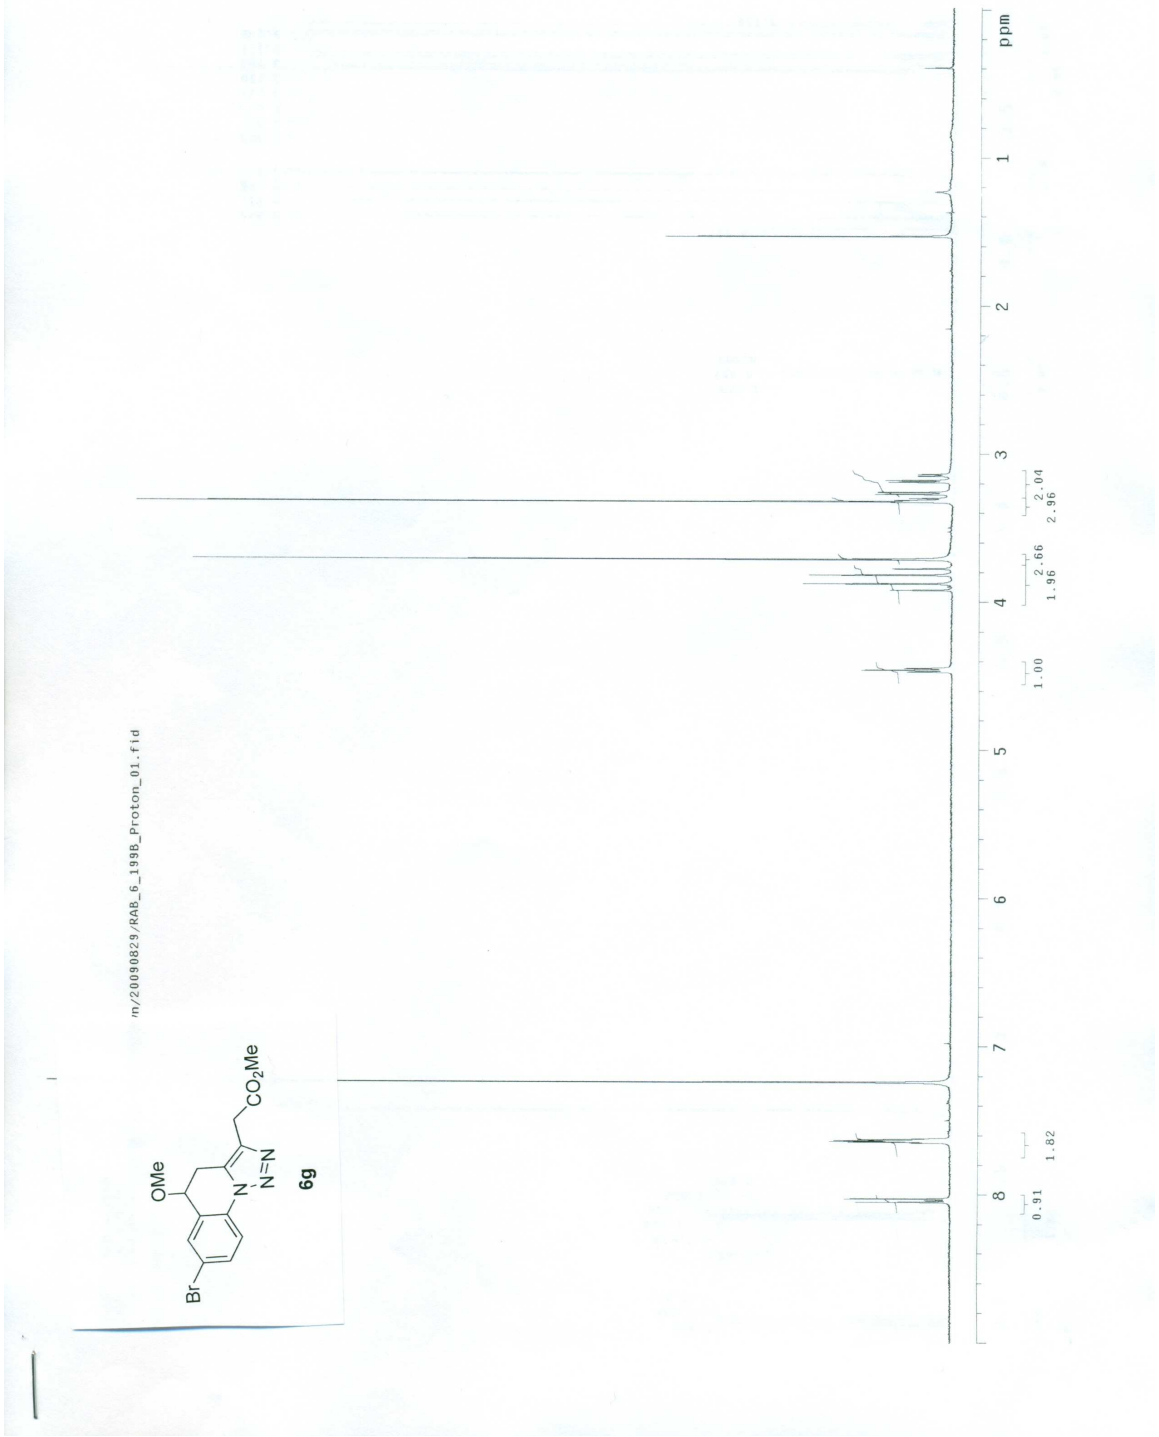

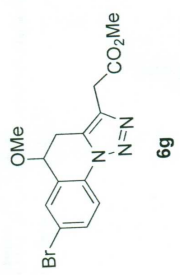

nmr/20090829/RAB\_6\_199B\_Carbon\_01.fid

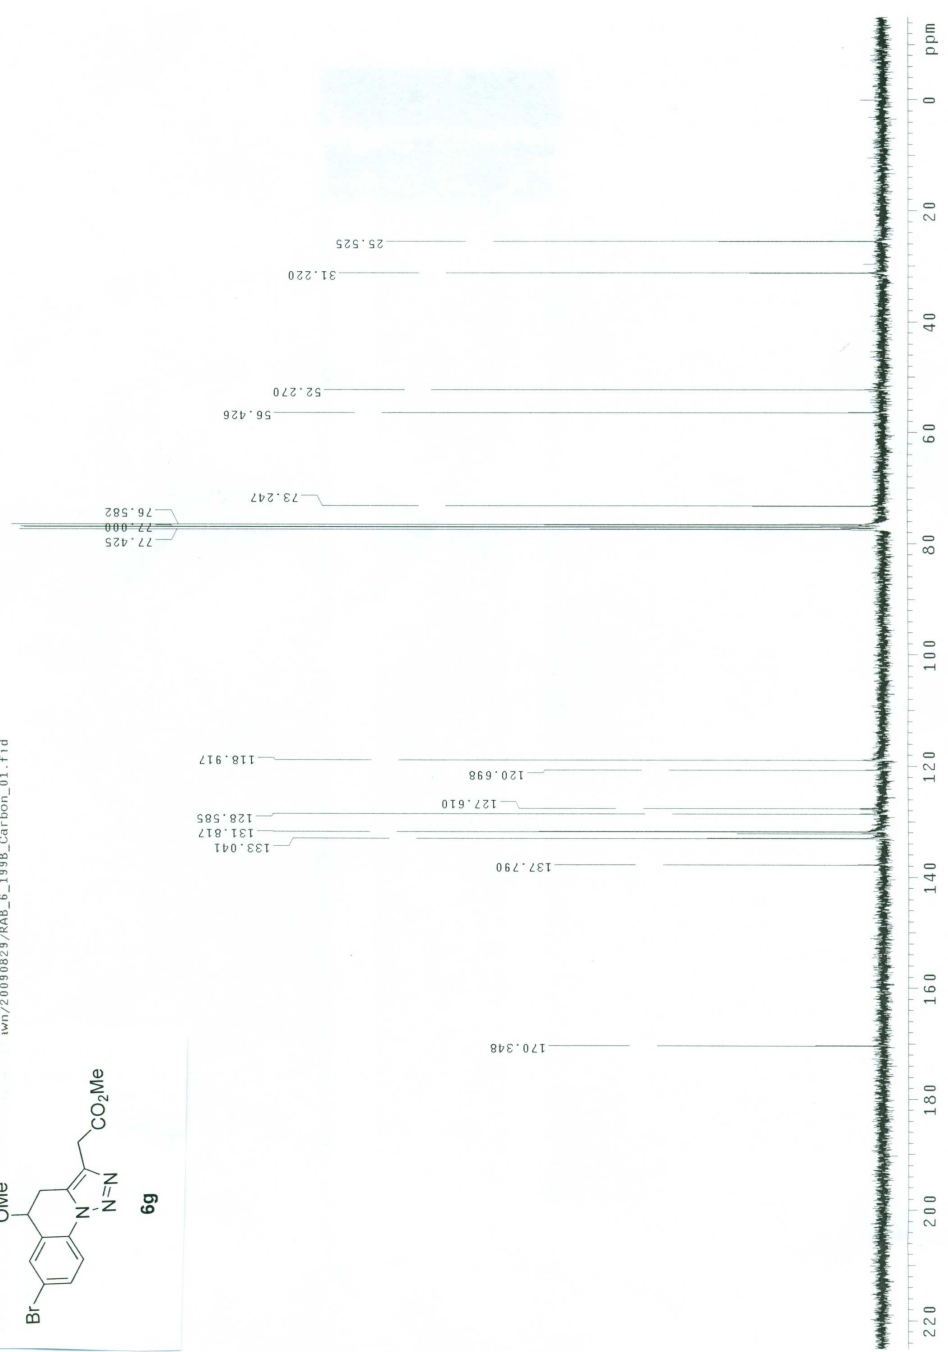

Sample: Pure\_aliphatic\_azide\_propargylation  
624/Pure\_aliphatic\_azide\_propargylation\_Proton\_01.fid

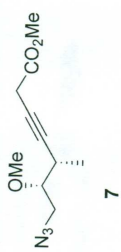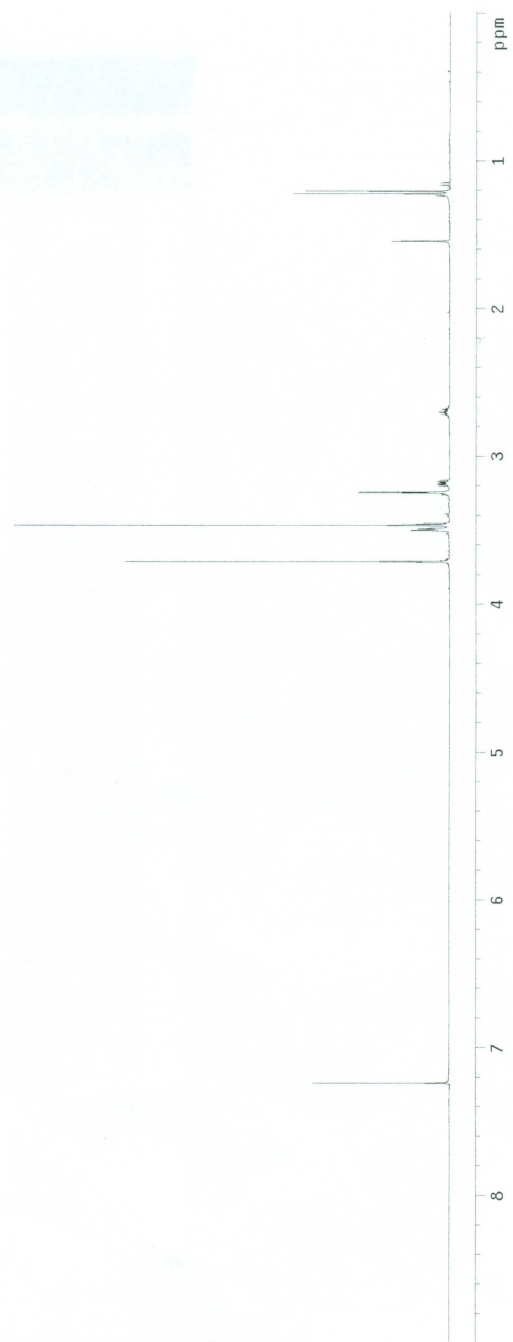

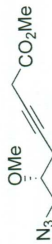

7

e:/wa1kupi/vnmrsws/data/studies/auto\_2007\_04\_10\_02

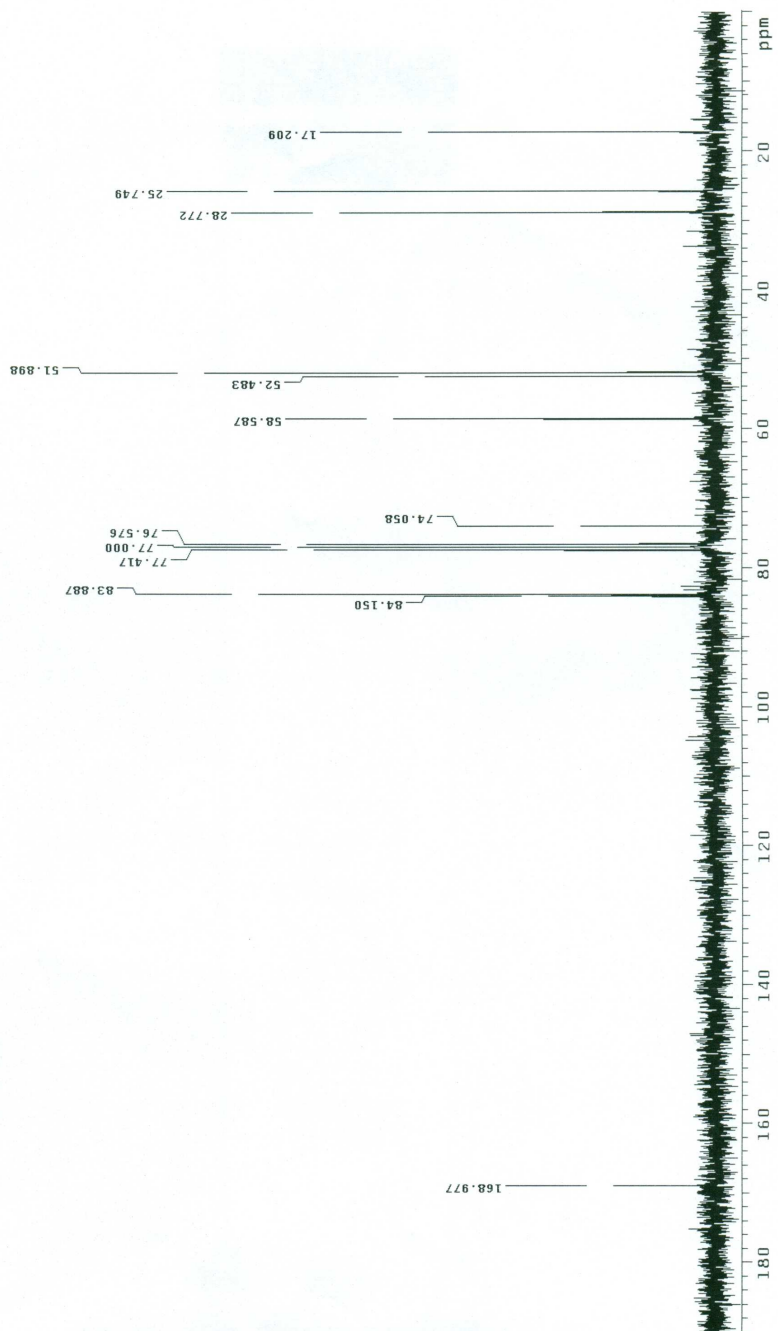

Sample: pure\_aliphatic\_azide\_cyclization  
Sample ID: S\_39\_01  
File: home\atitkopi\4400\jay\owc\20080624\pure\_aliphatic\_azide\_cyclization\_Proton\_01.fid

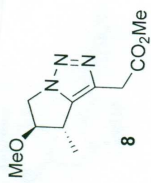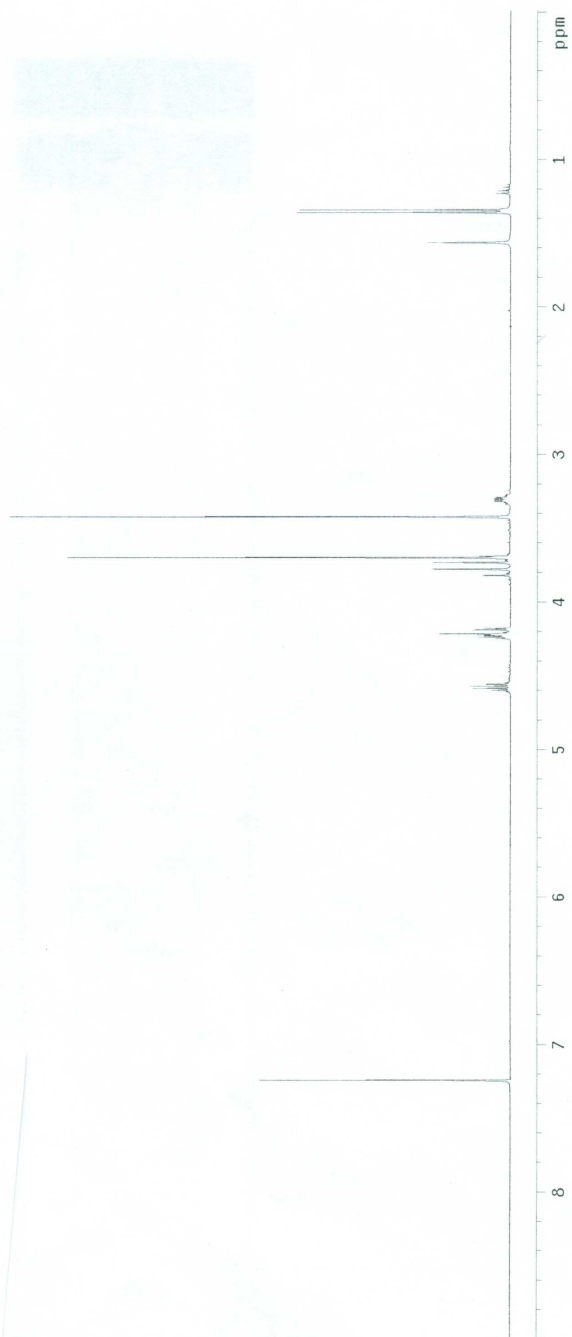

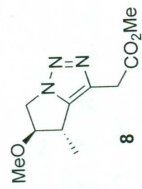

./va1kup1/vmmsys/data/studies/auto\_2007.04.10\_02

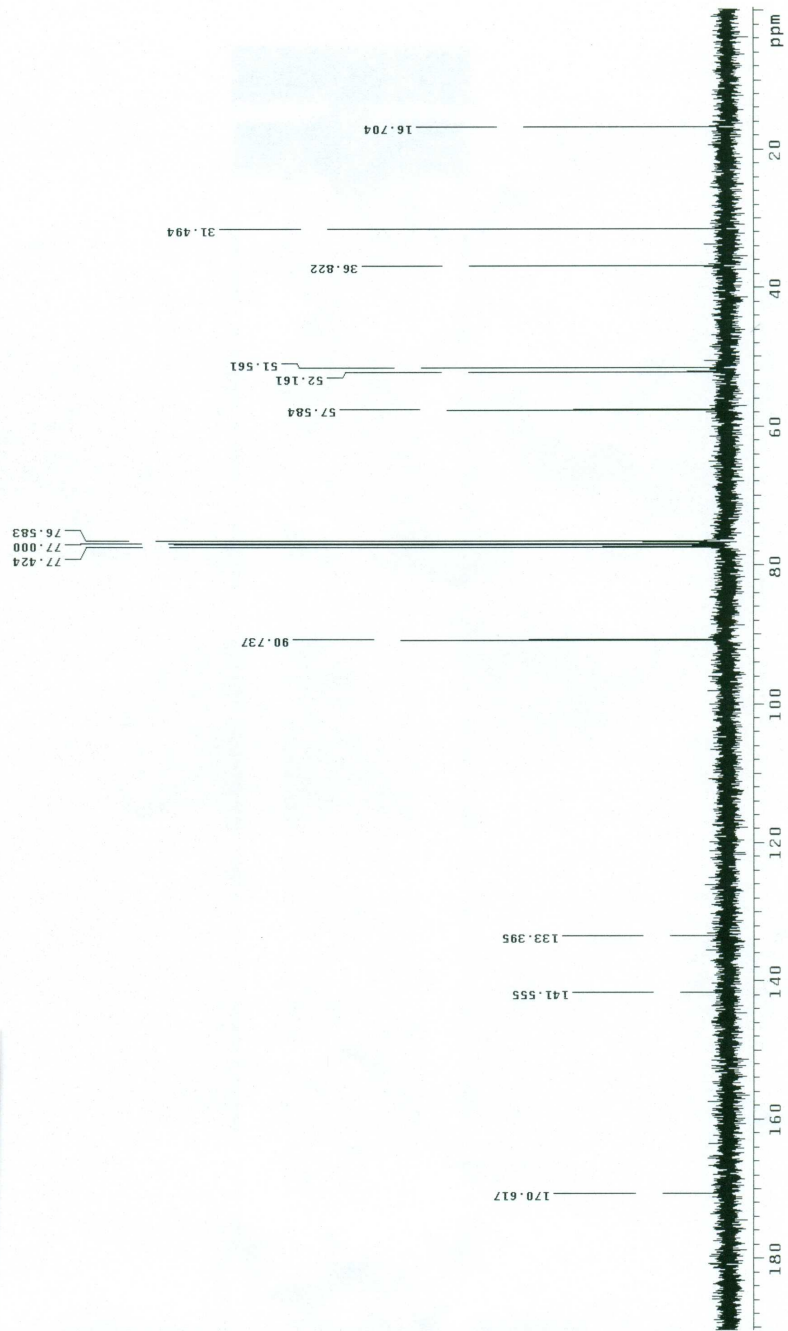

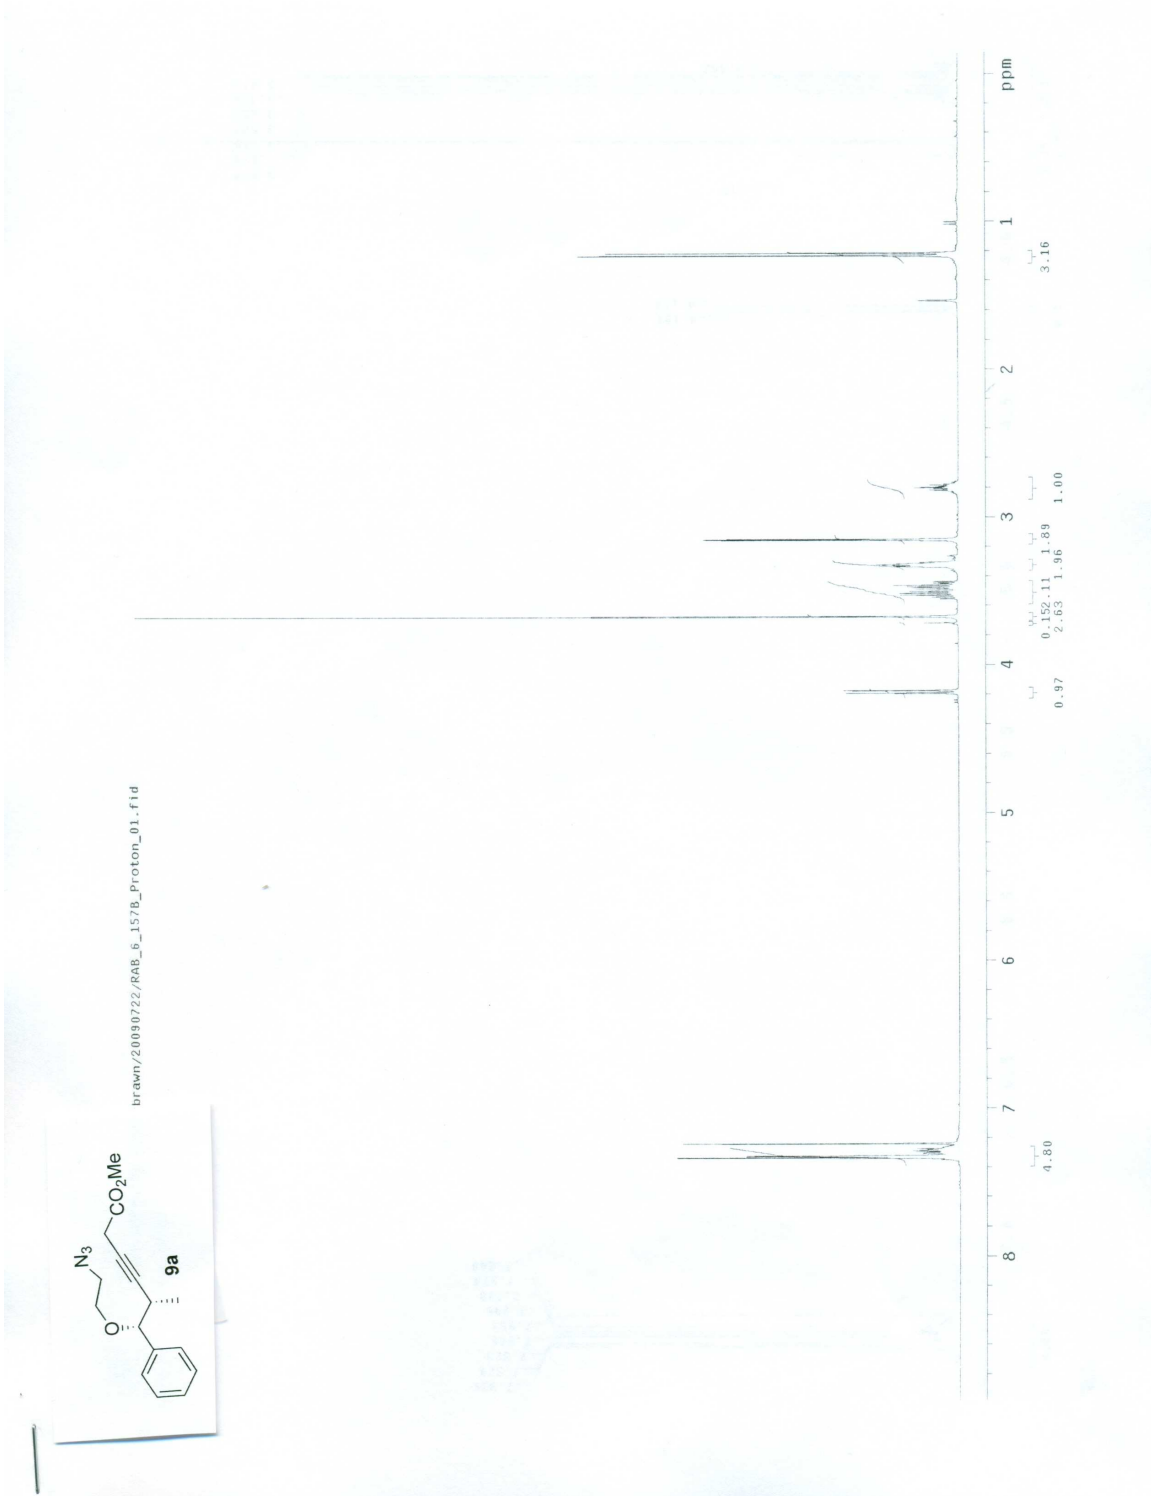



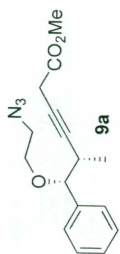

me/walakup1/vnmrsys/data/studies/auto\_2007.04.10\_02

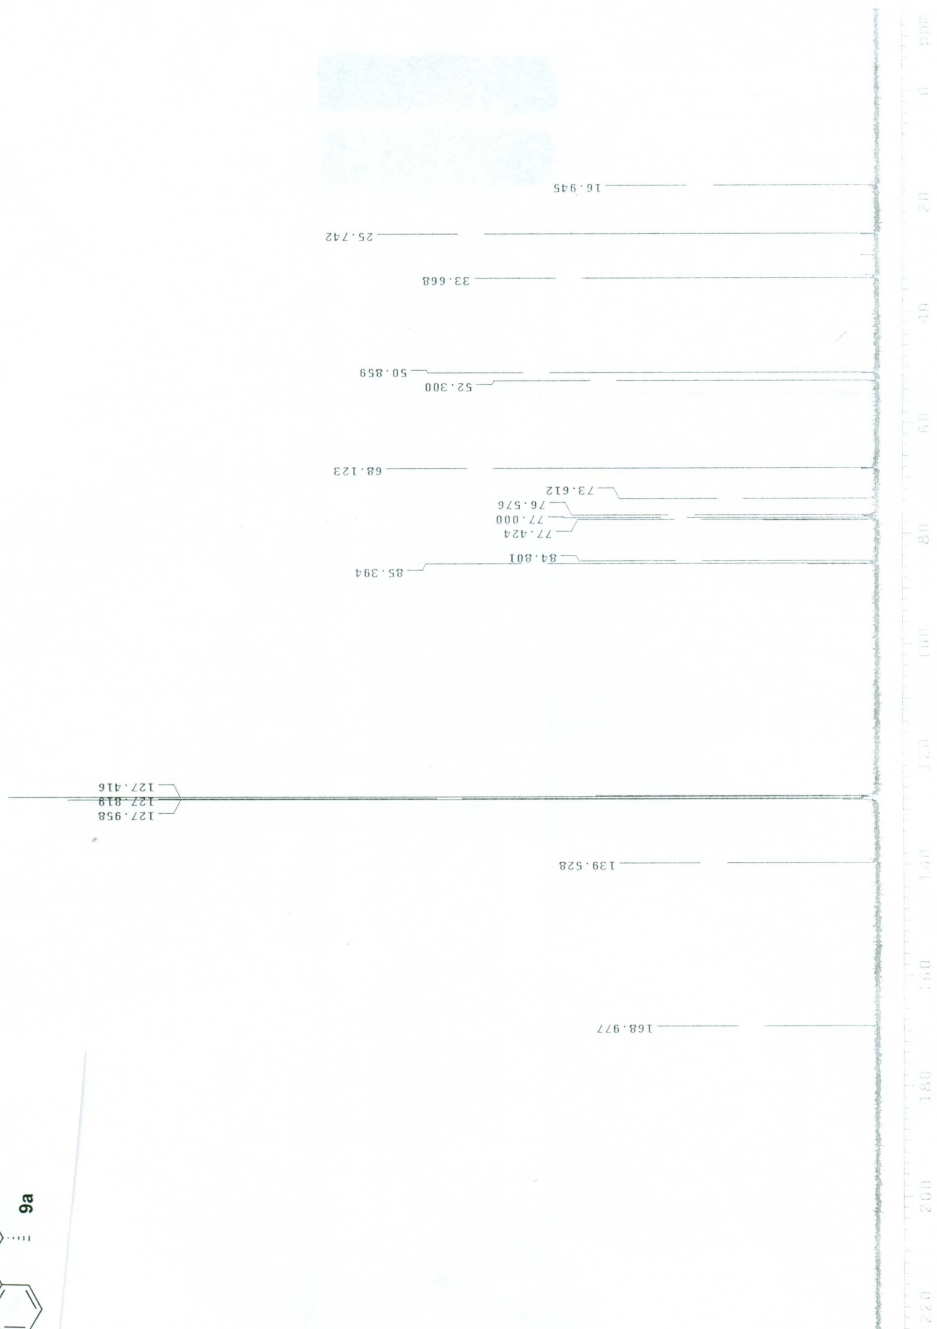

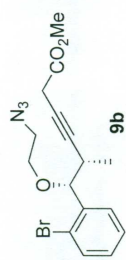

20090720/RAB\_6\_157A\_Proton\_01.fid

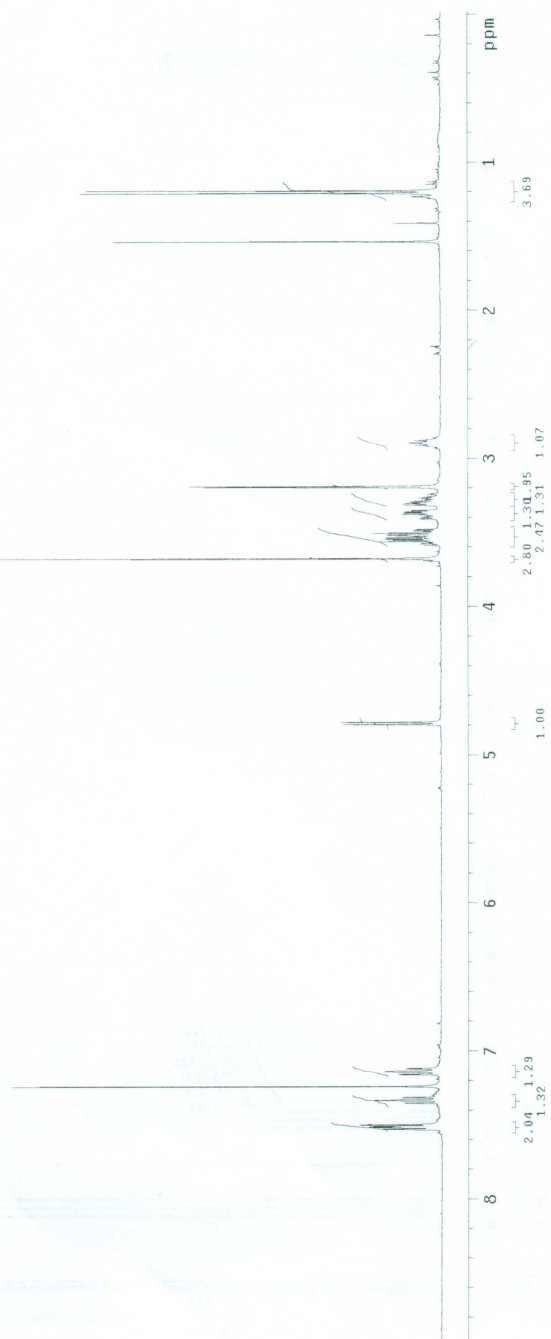

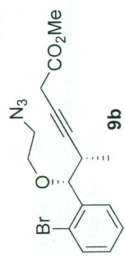

3/RAB\_5\_128A\_Carbon\_01.f1d

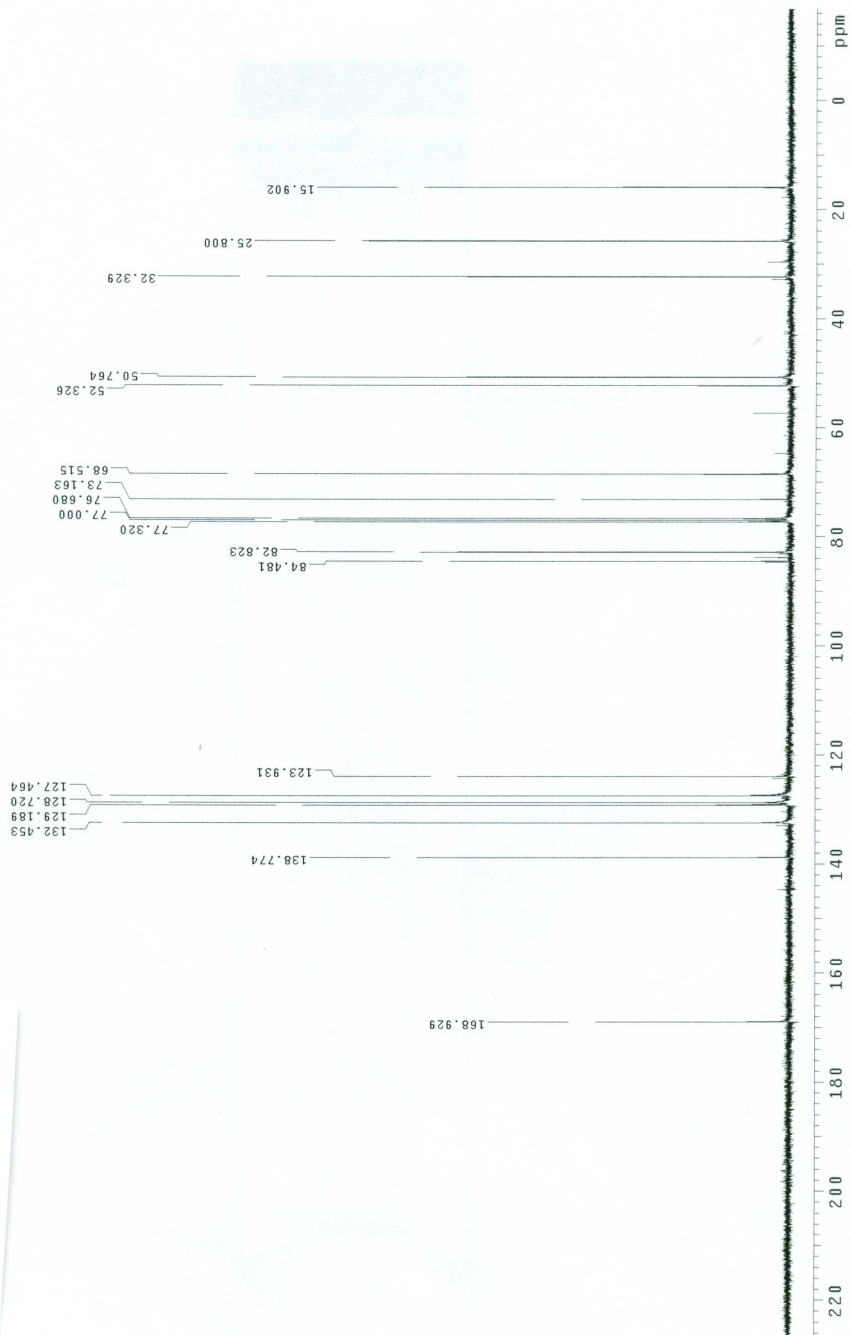

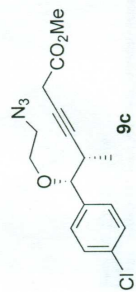

/20090725/RA05\_6\_150a08\_Proton\_01.fid

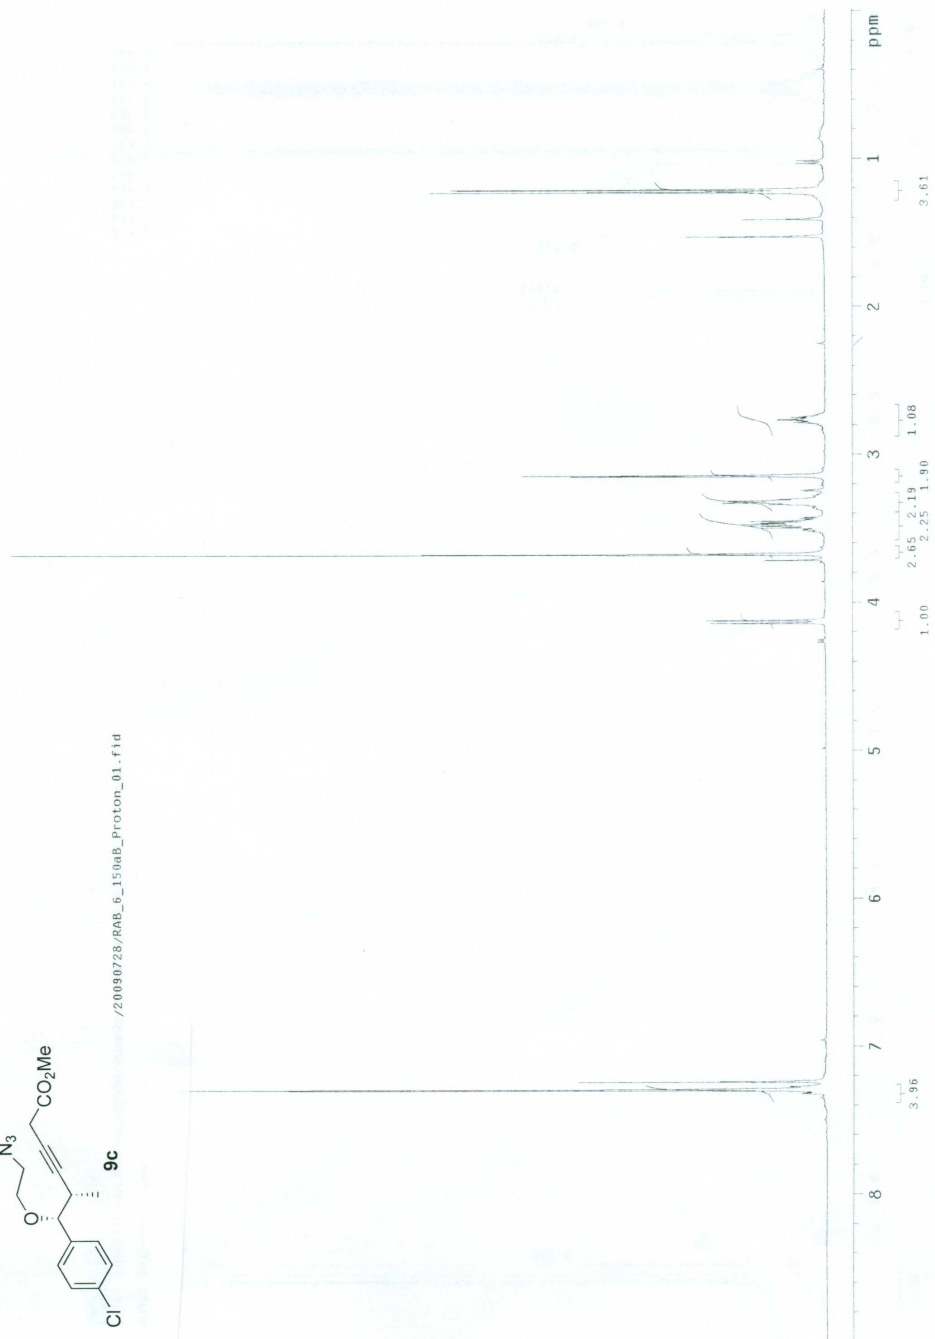

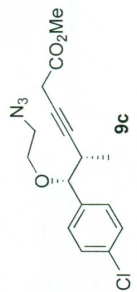

20090801/RAB\_6\_150ab\_Carbon\_01.fid

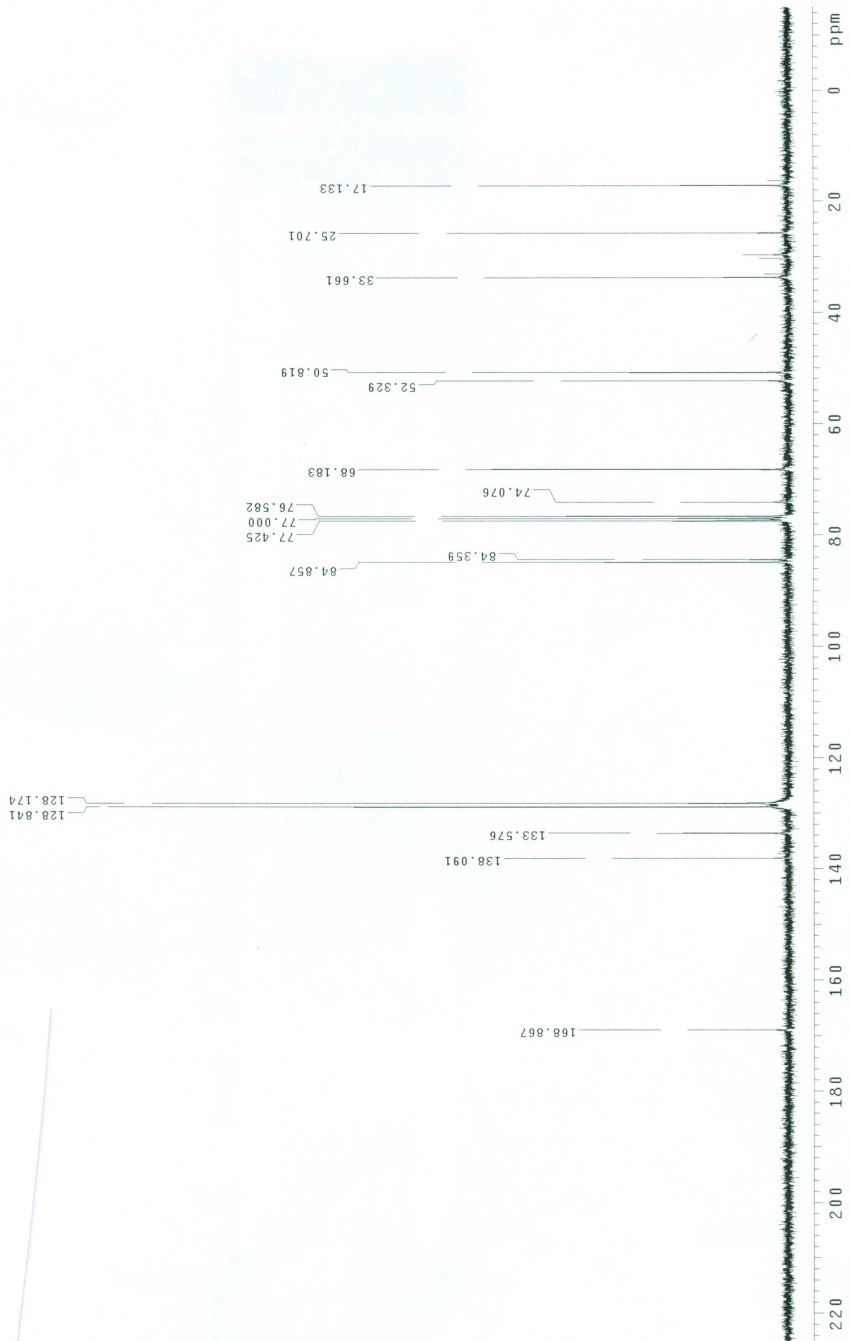

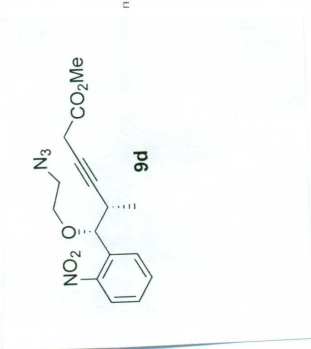

n/20090728/RAB\_6\_150aC\_Proton\_01.fid

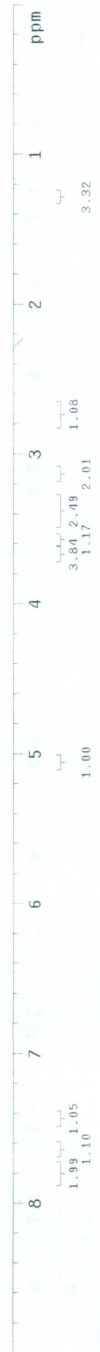

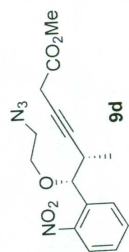

smn/20091017/RAB\_6\_276A\_Carbon\_01.f1d

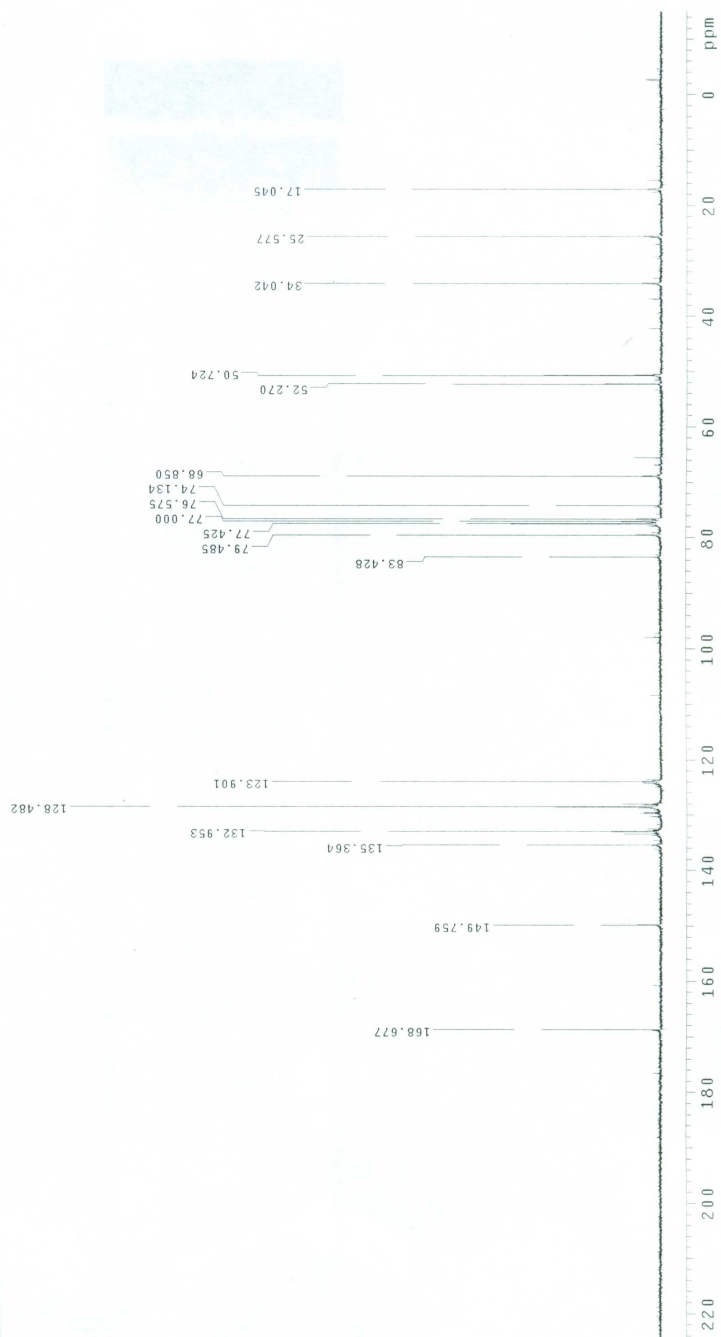

2C\_Proton\_01.fid

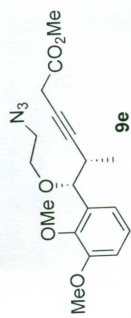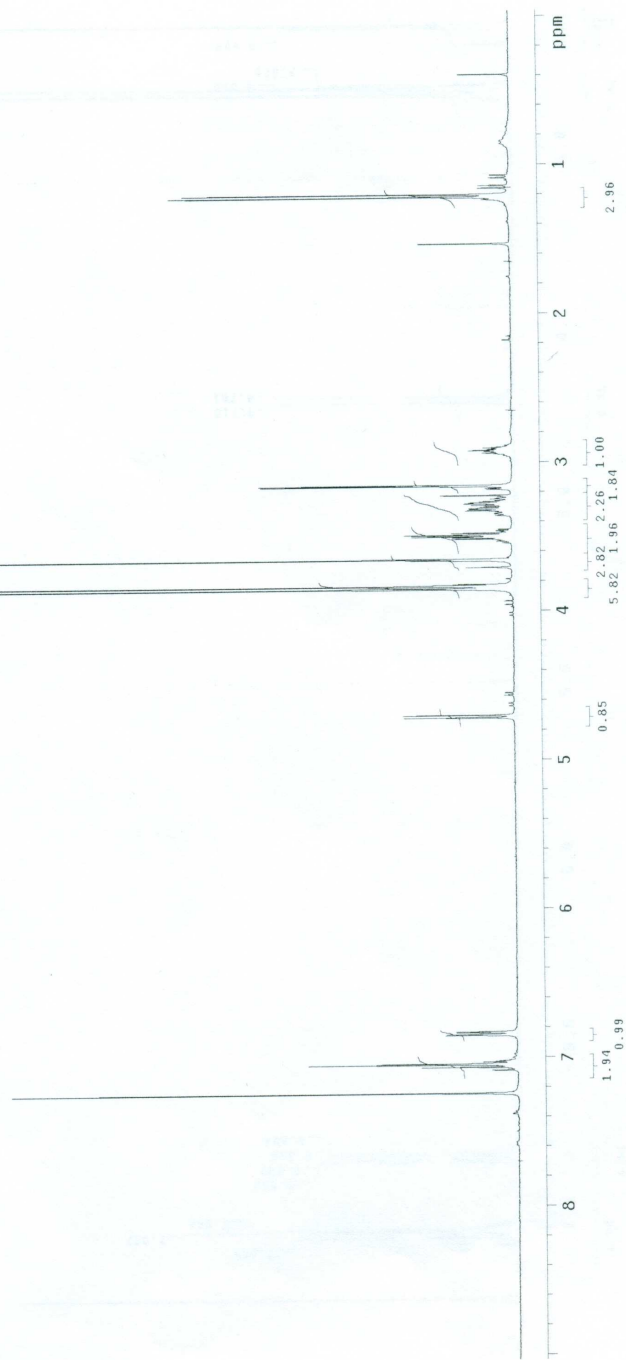



urbon\_01.f1d

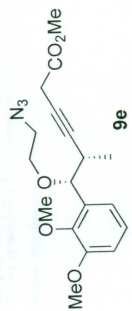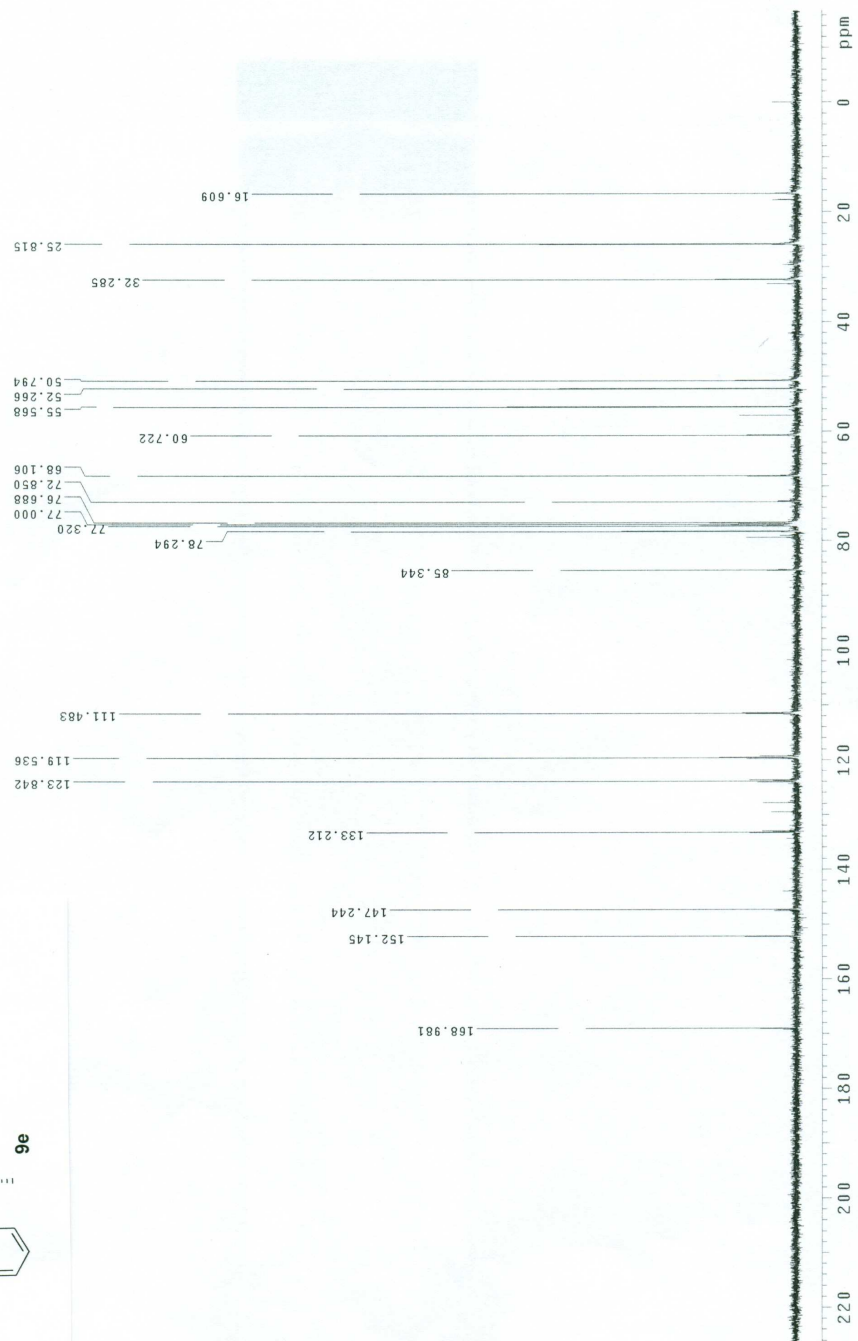

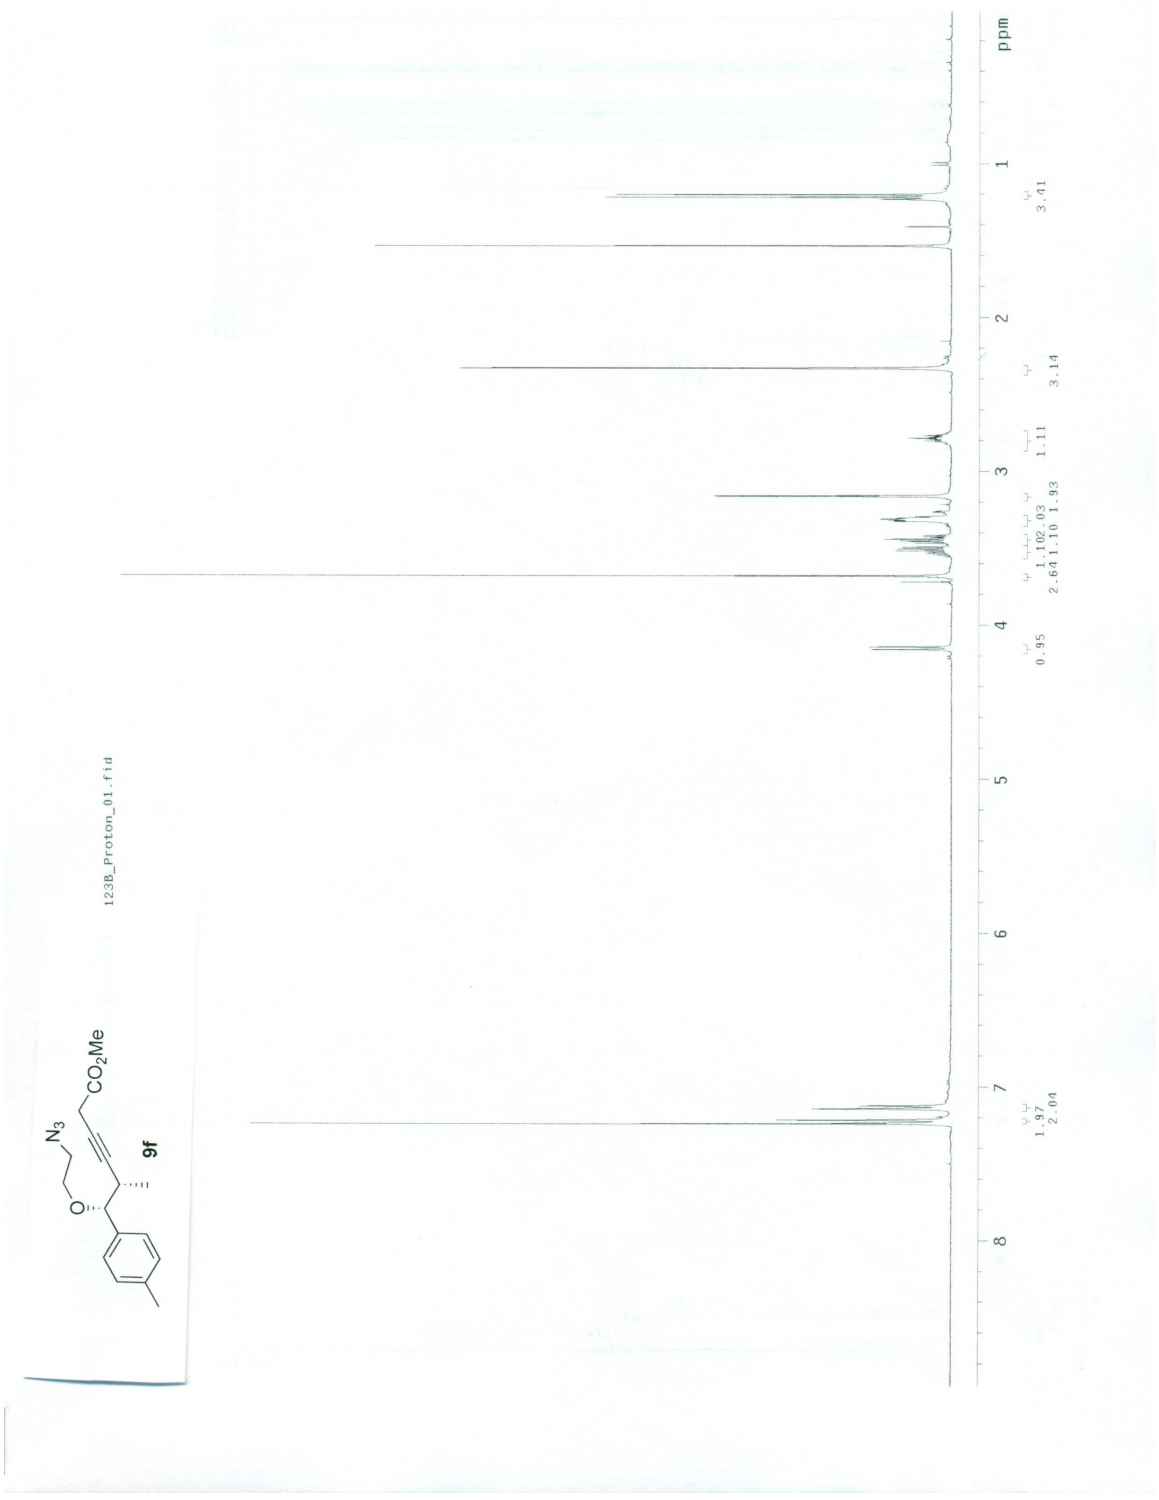

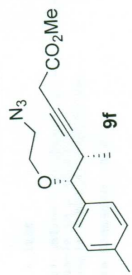

s:/data/studies/auto\_2007\_04.10\_02

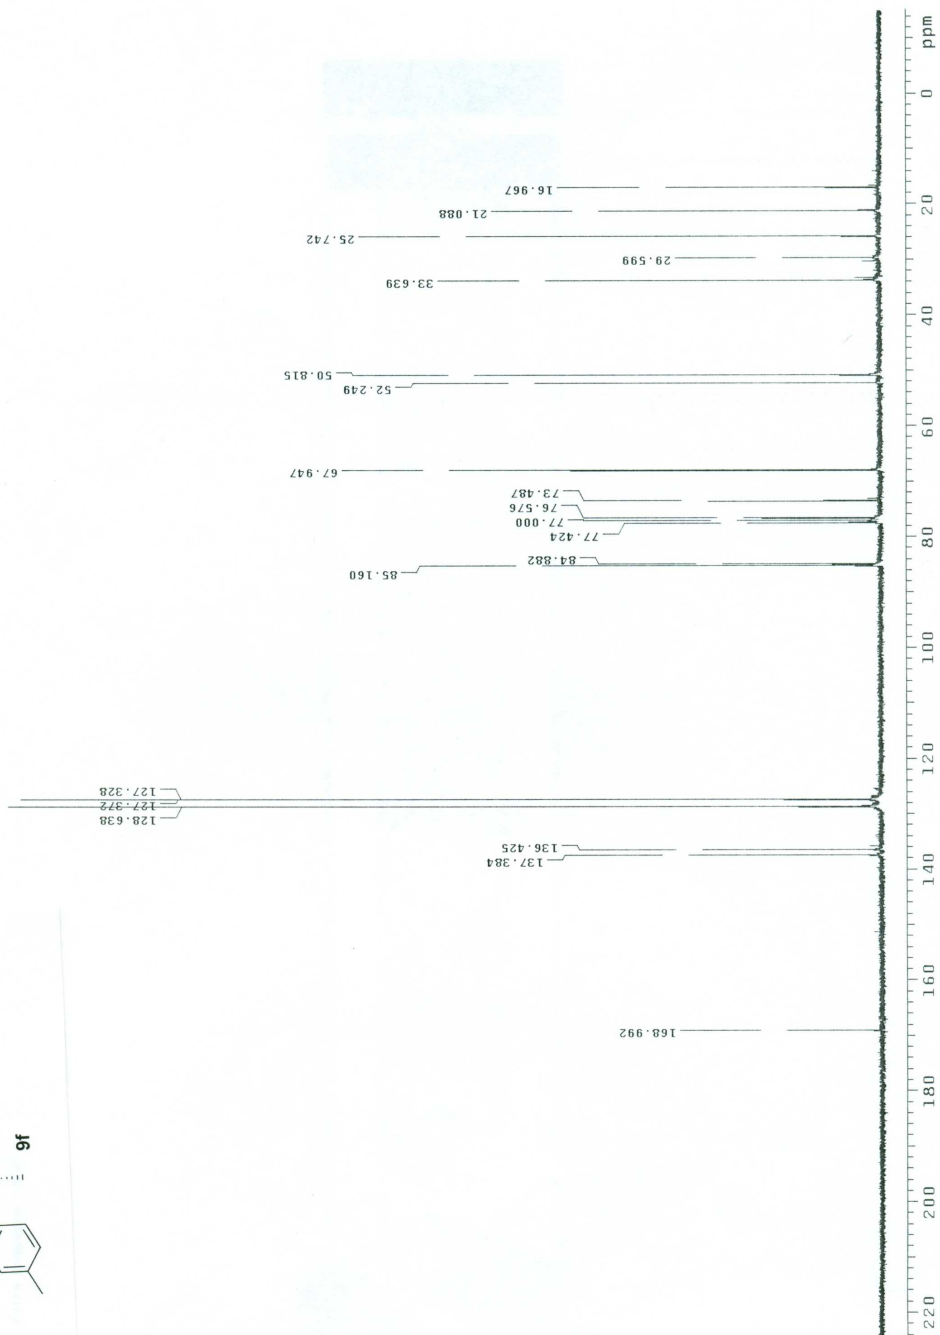

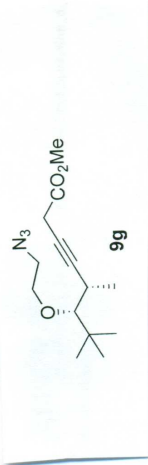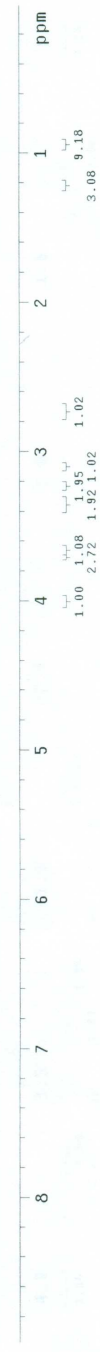

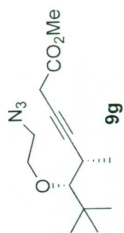

\_162A\_Carbon\_01.f1d

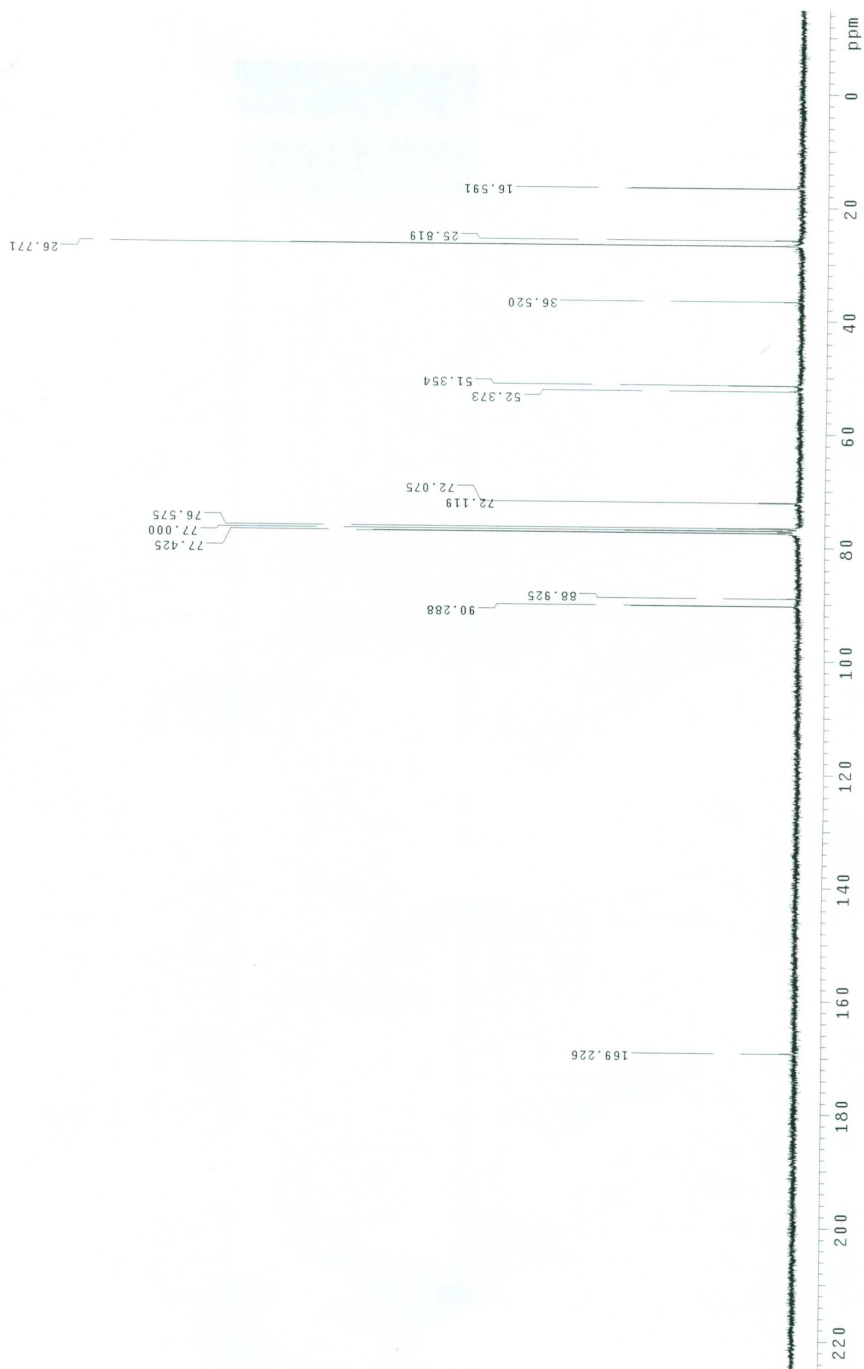

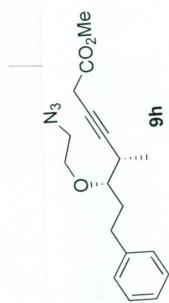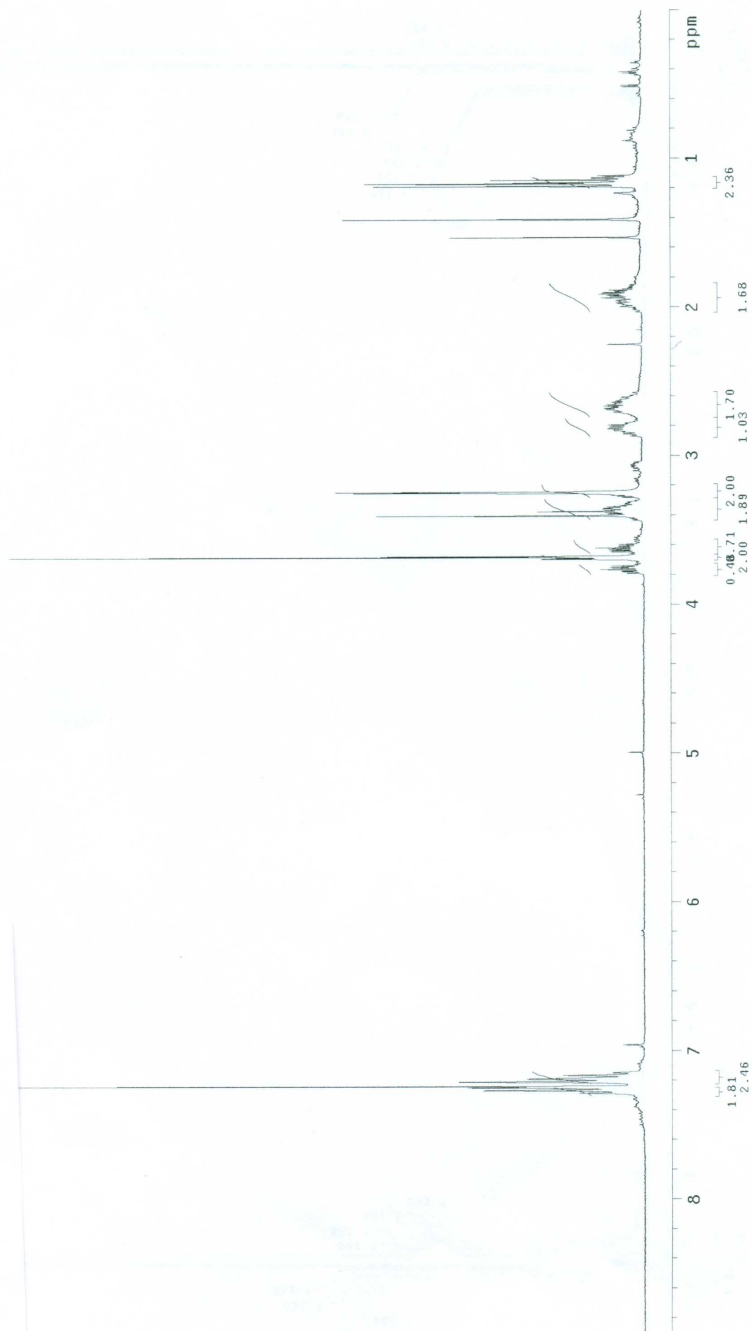

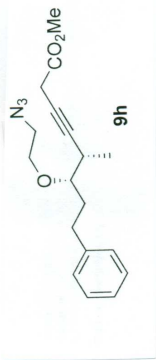

2018\_Carbon\_01.f1d

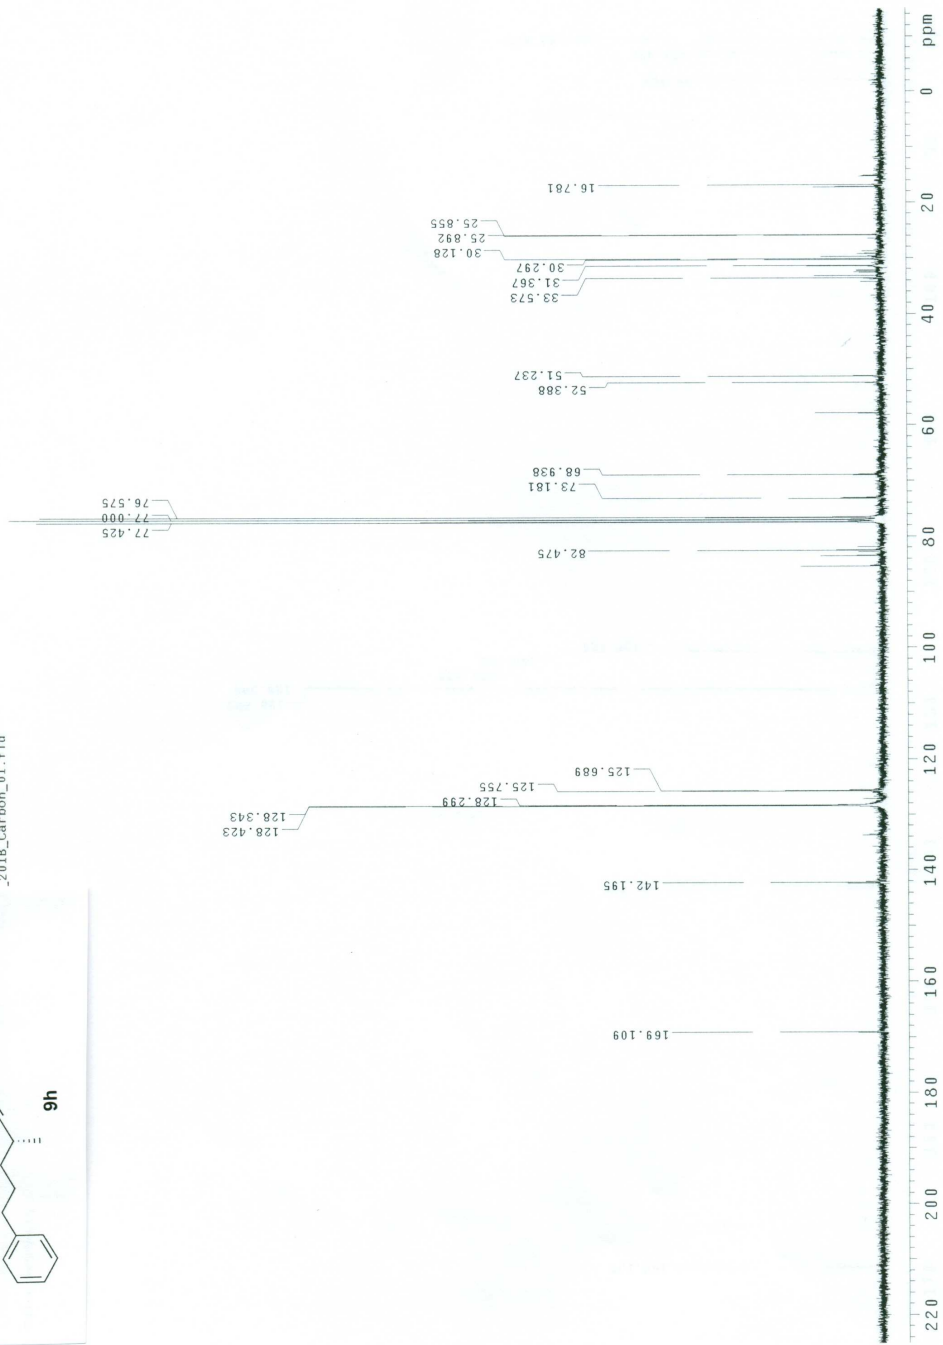

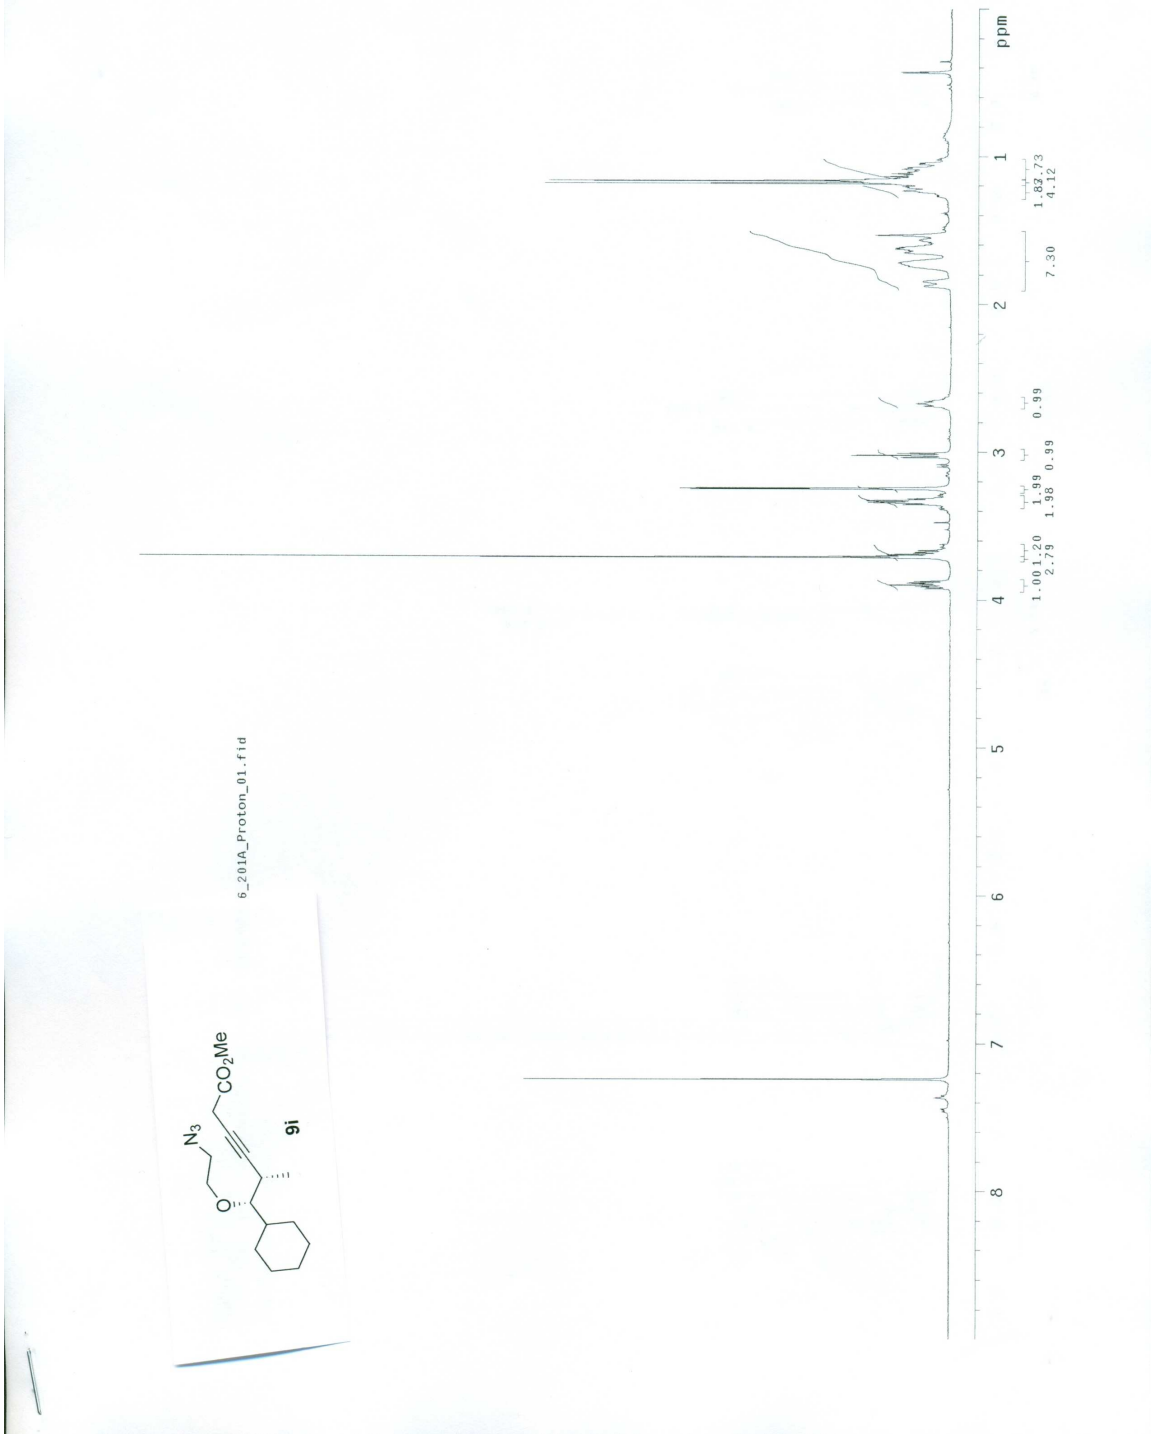



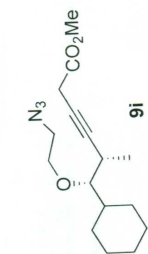

1\_201A\_Carbon\_01.f1d

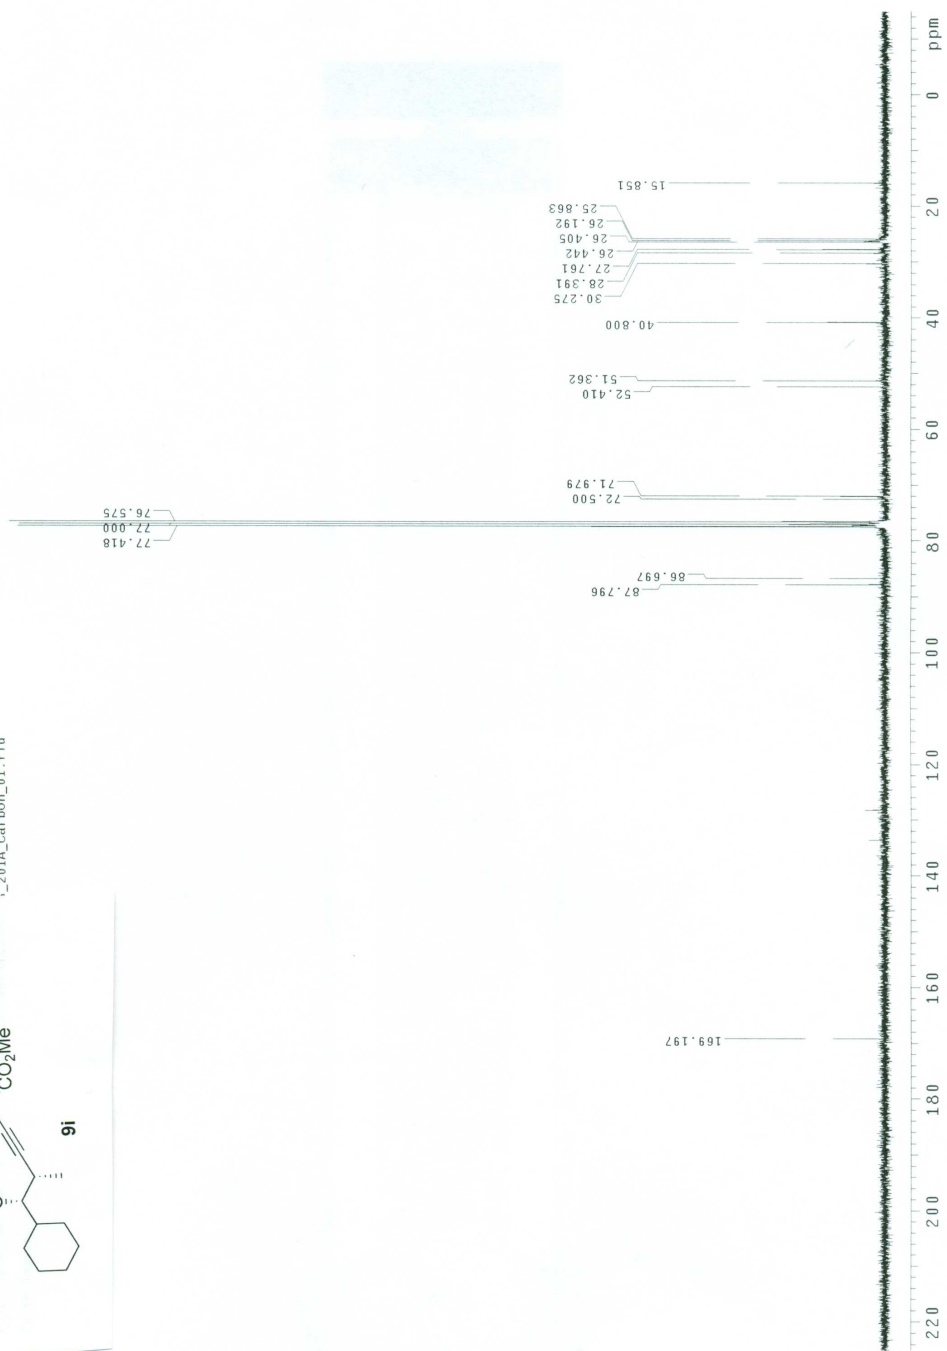

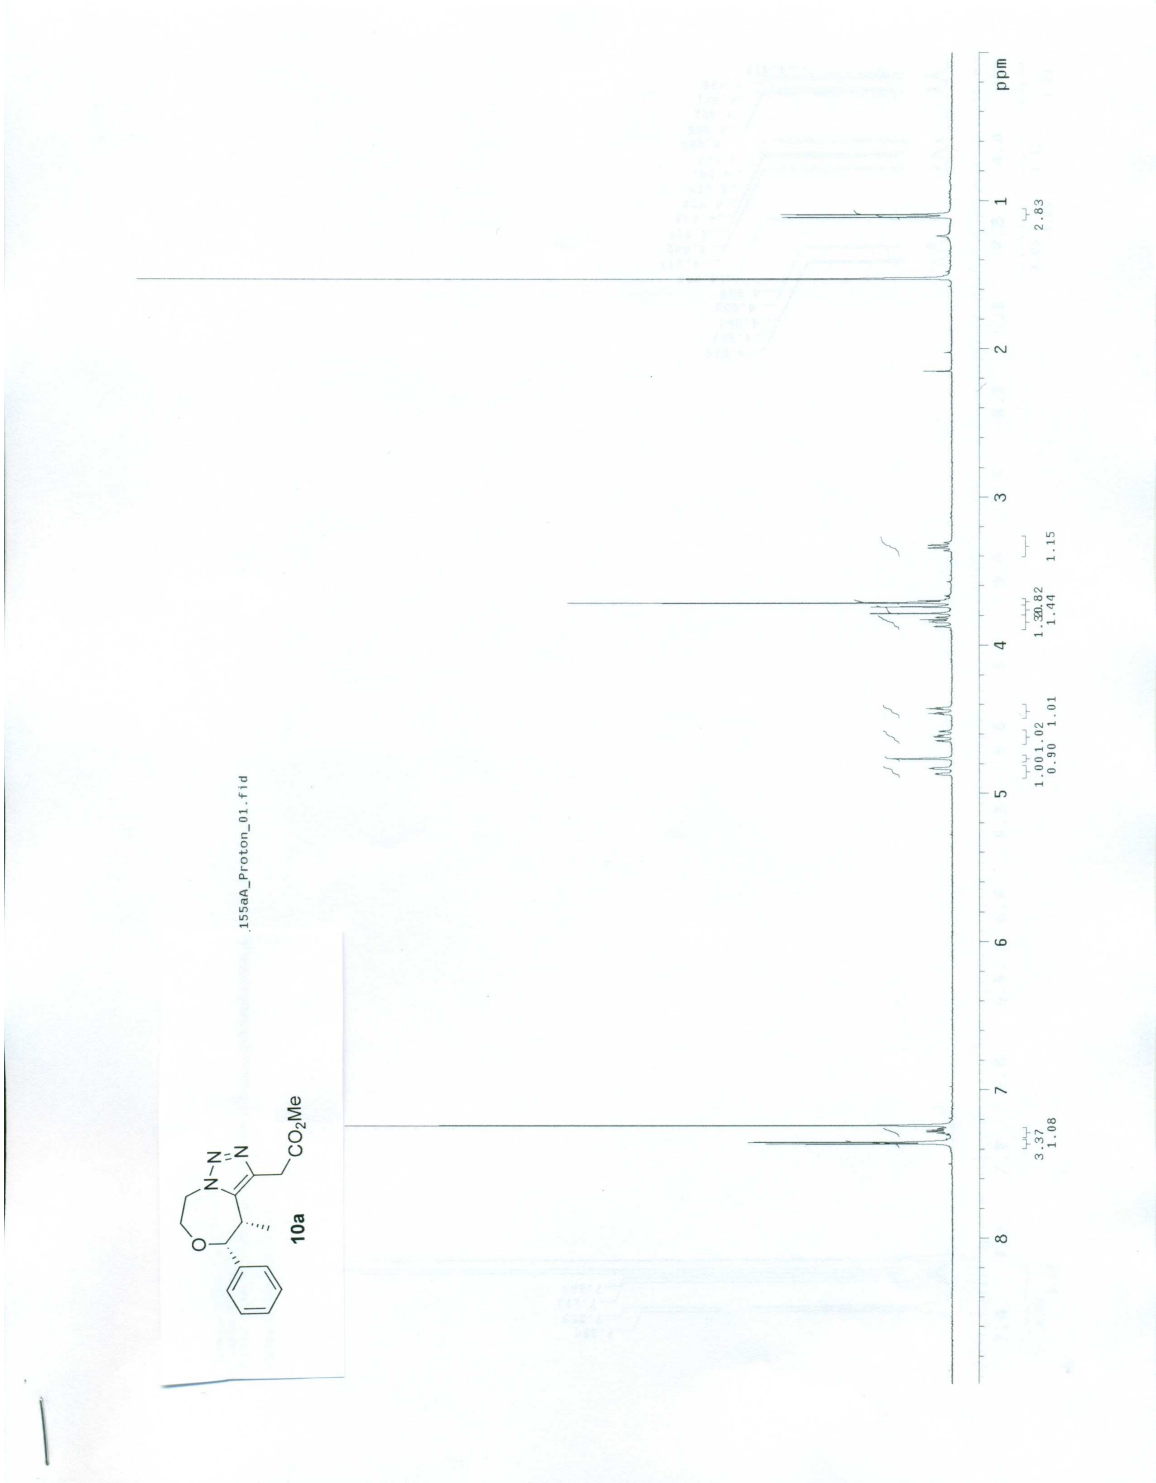

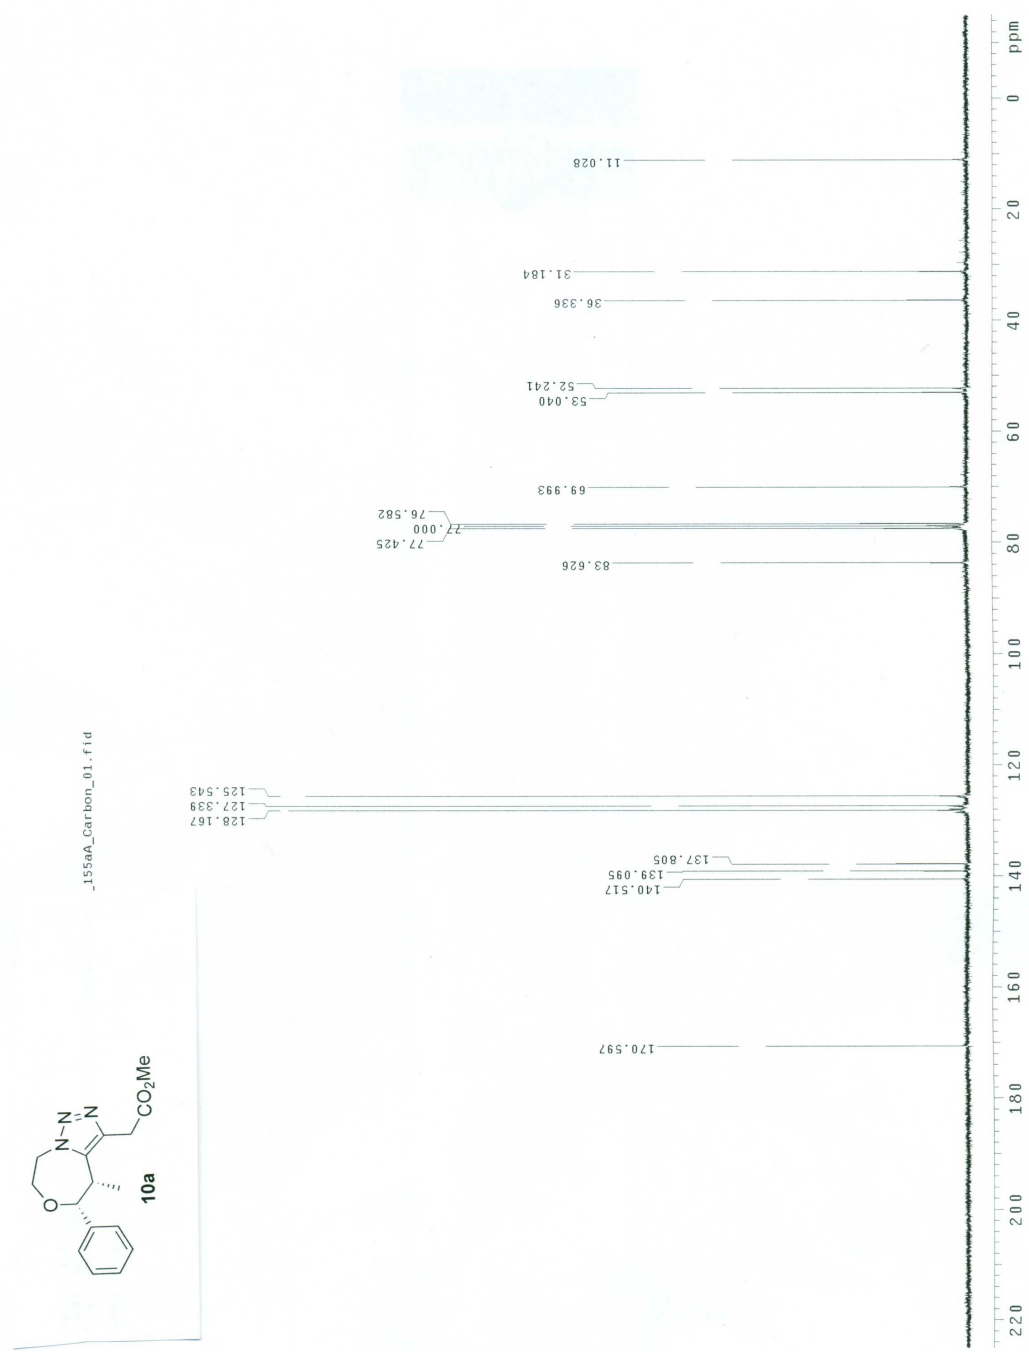

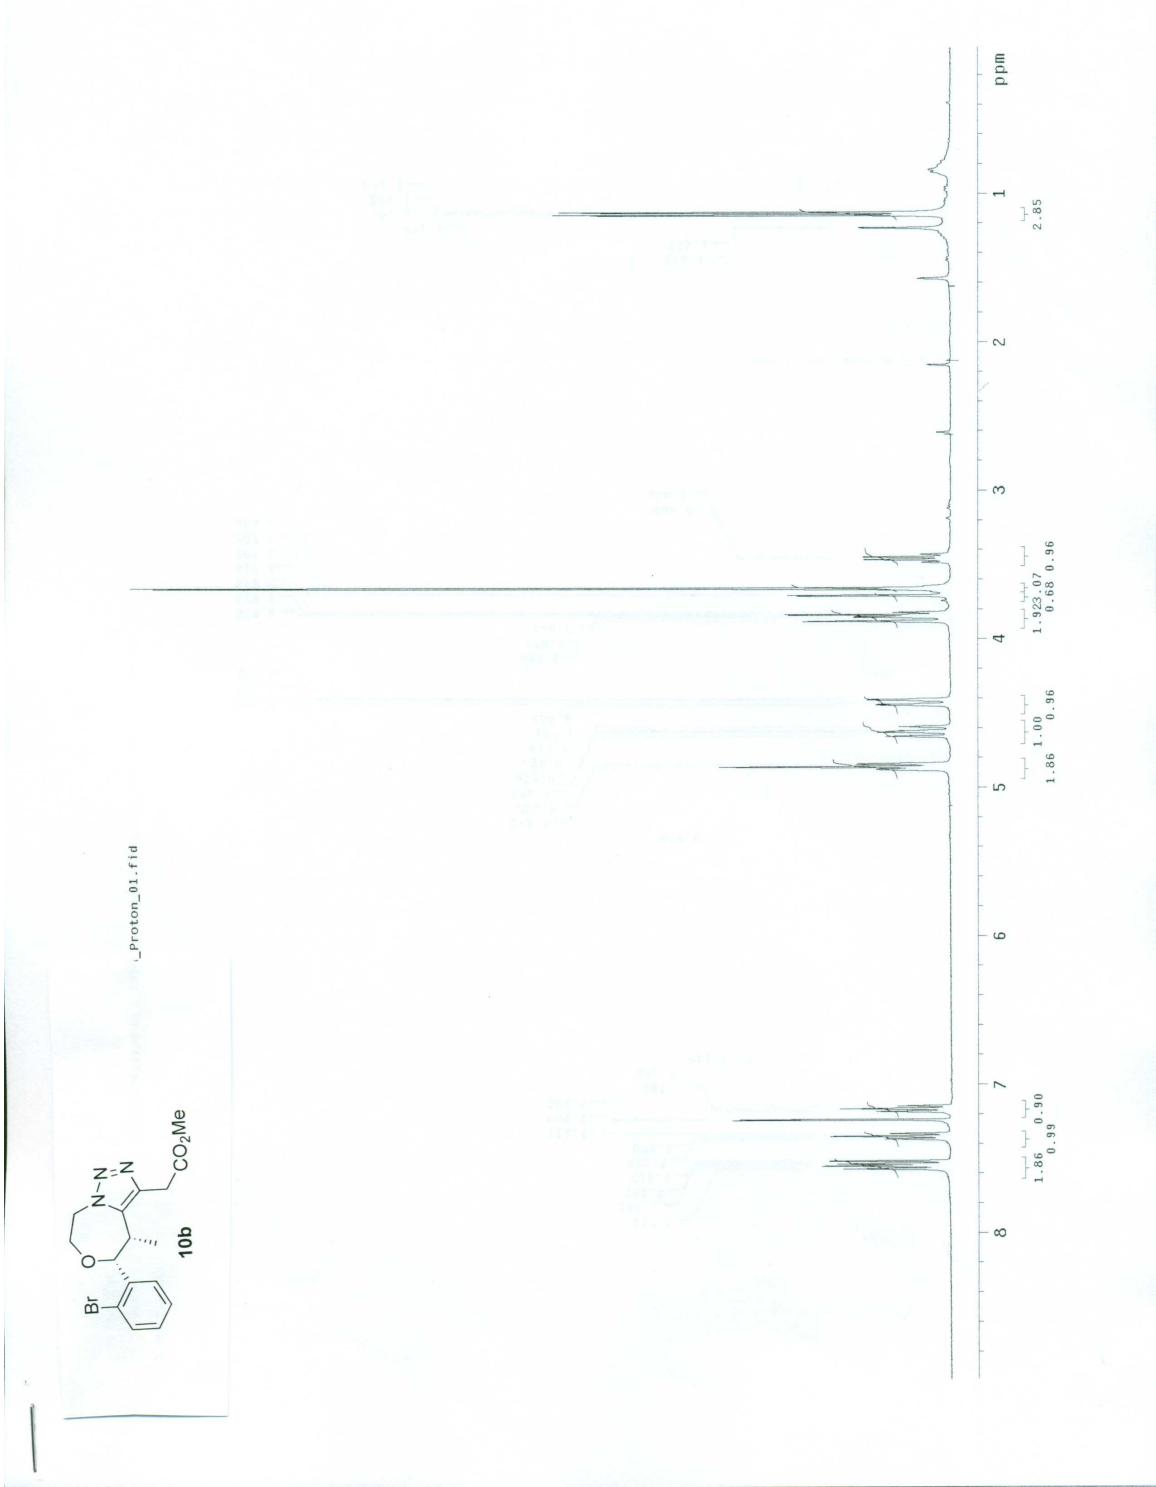

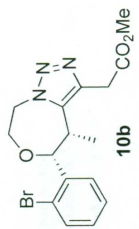

non\_01.f1d

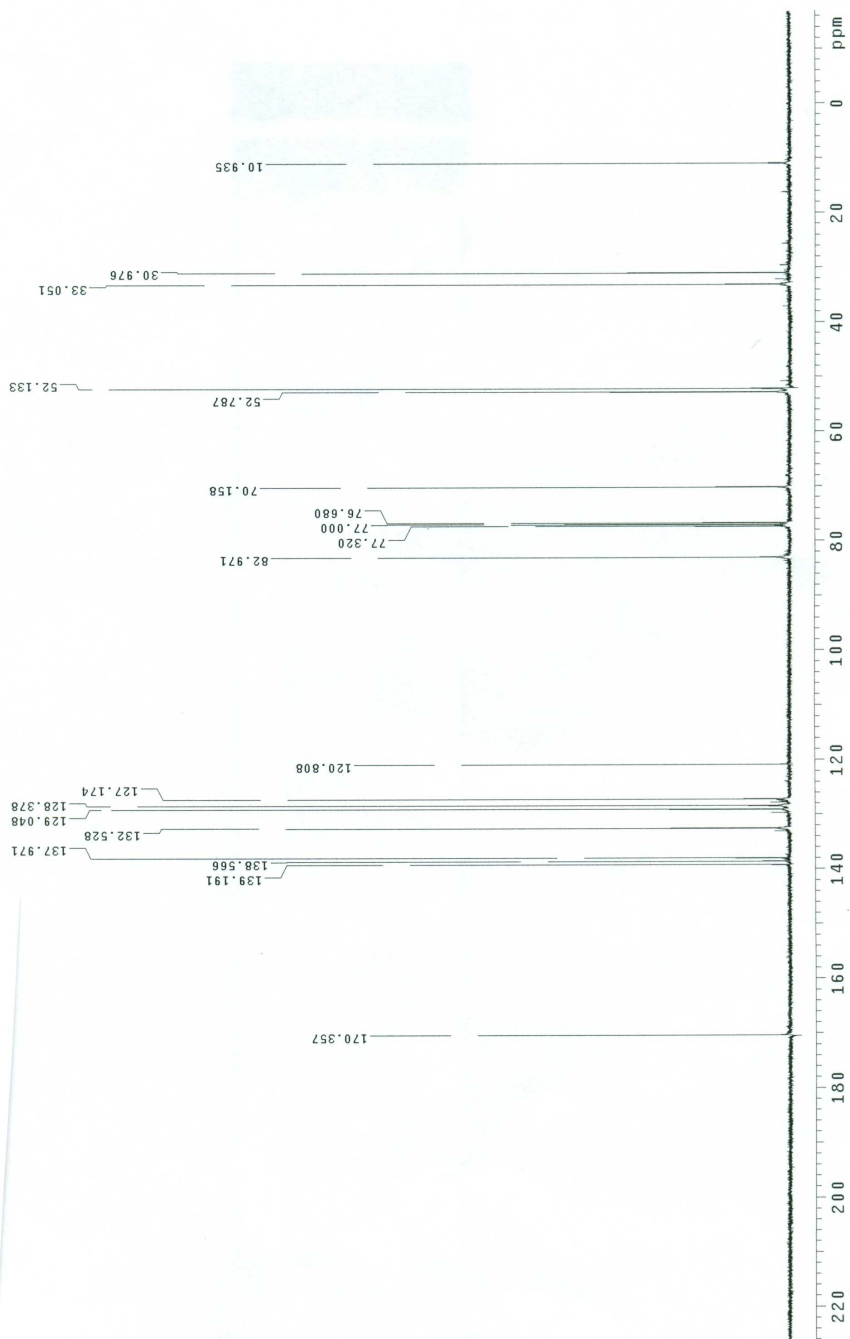

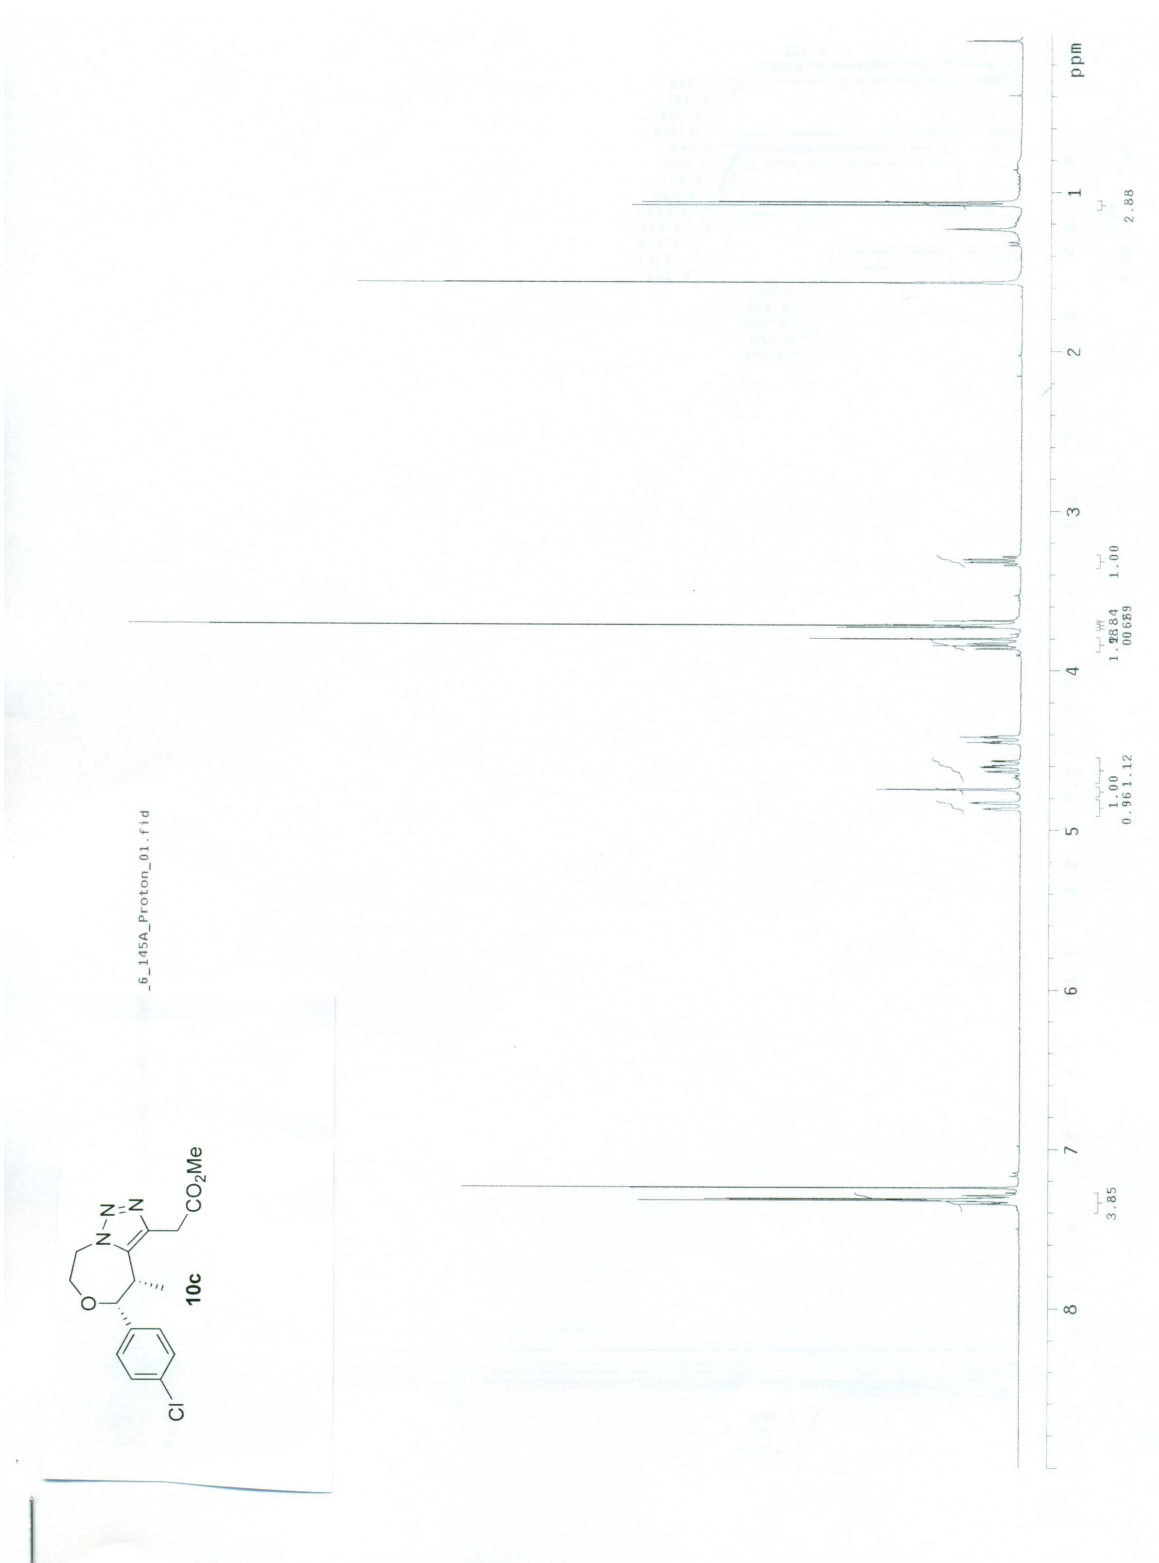

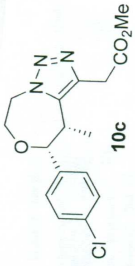

301.523250 MHz  
 OBSERVE HI, 301.523250 MHz  
 PULPROG zgpg30  
 FT size 32768  
 Total time 7 min, 8 sec

ata/studies/auto\_2007.04.10\_02

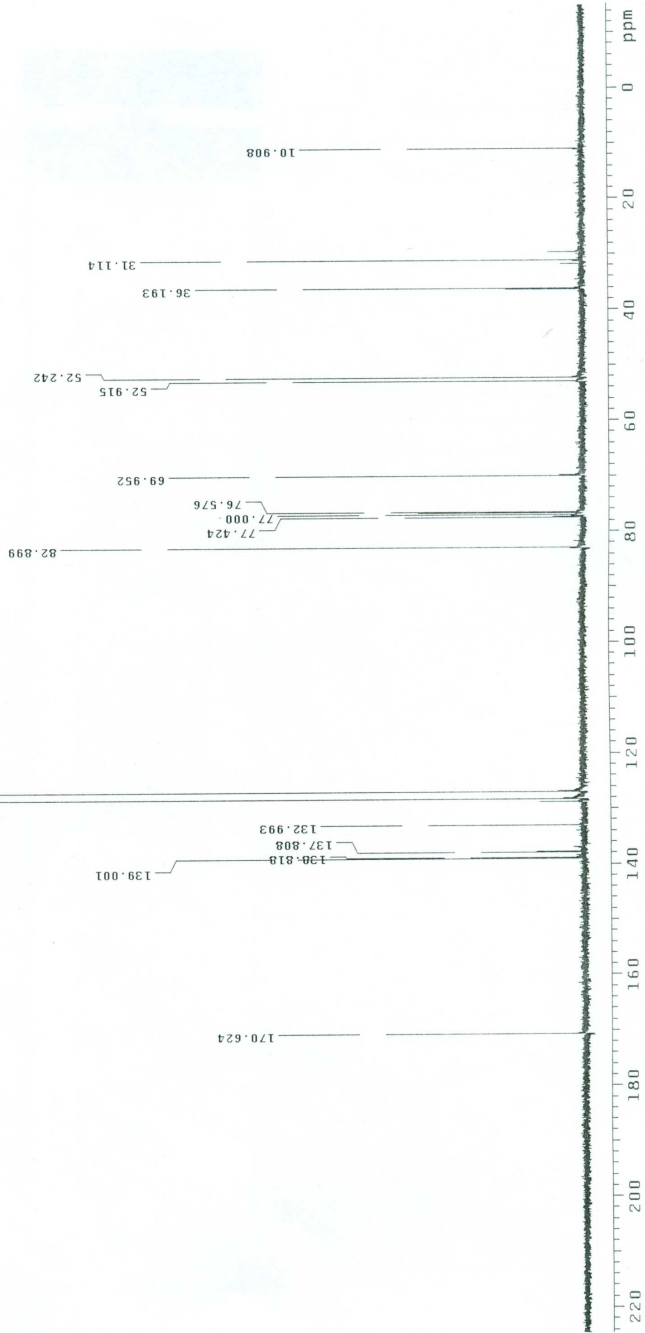

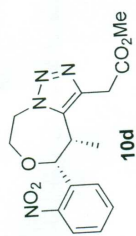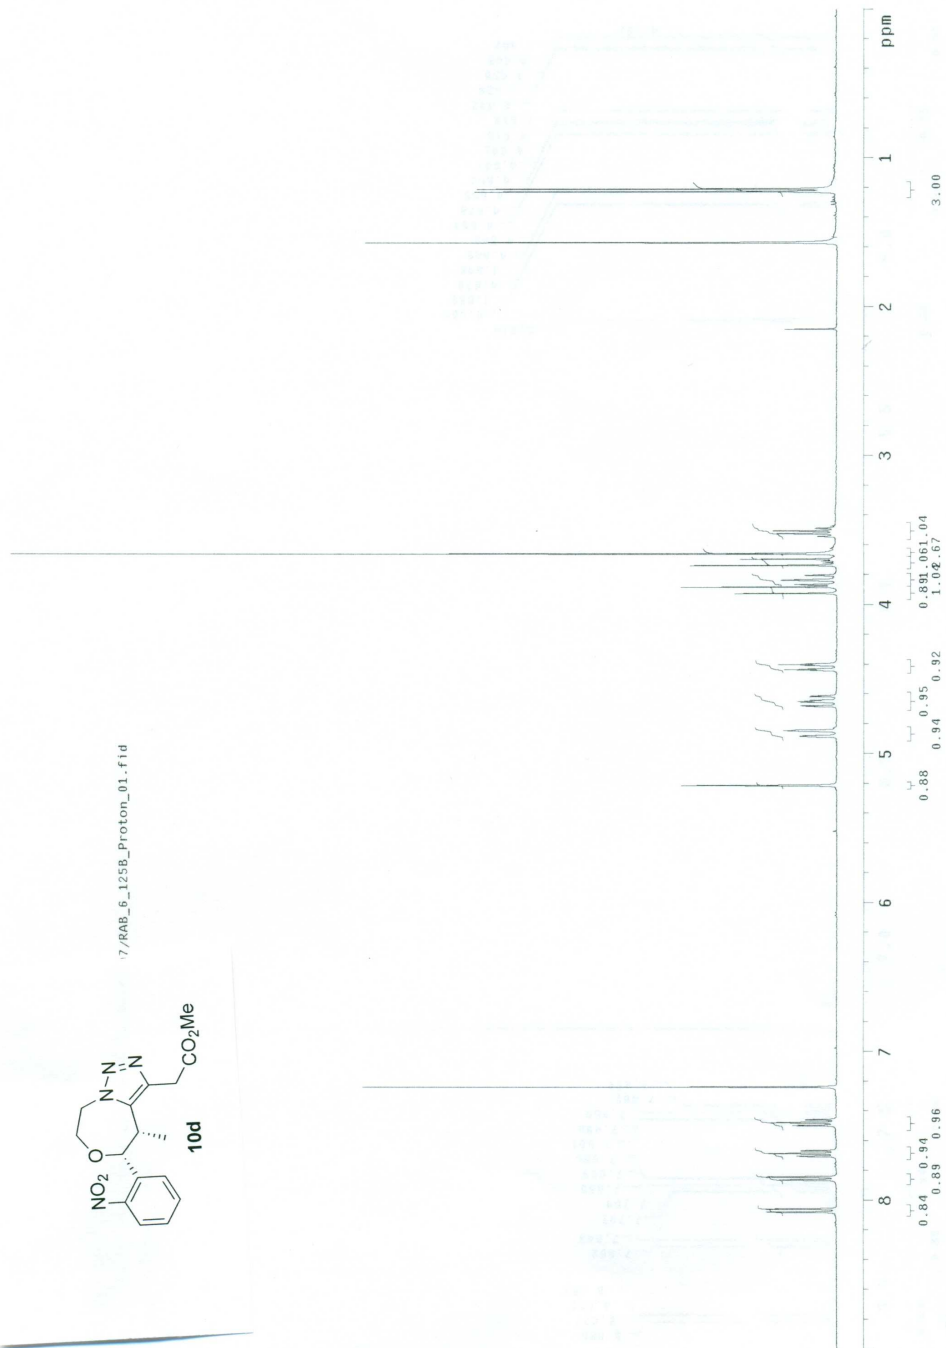



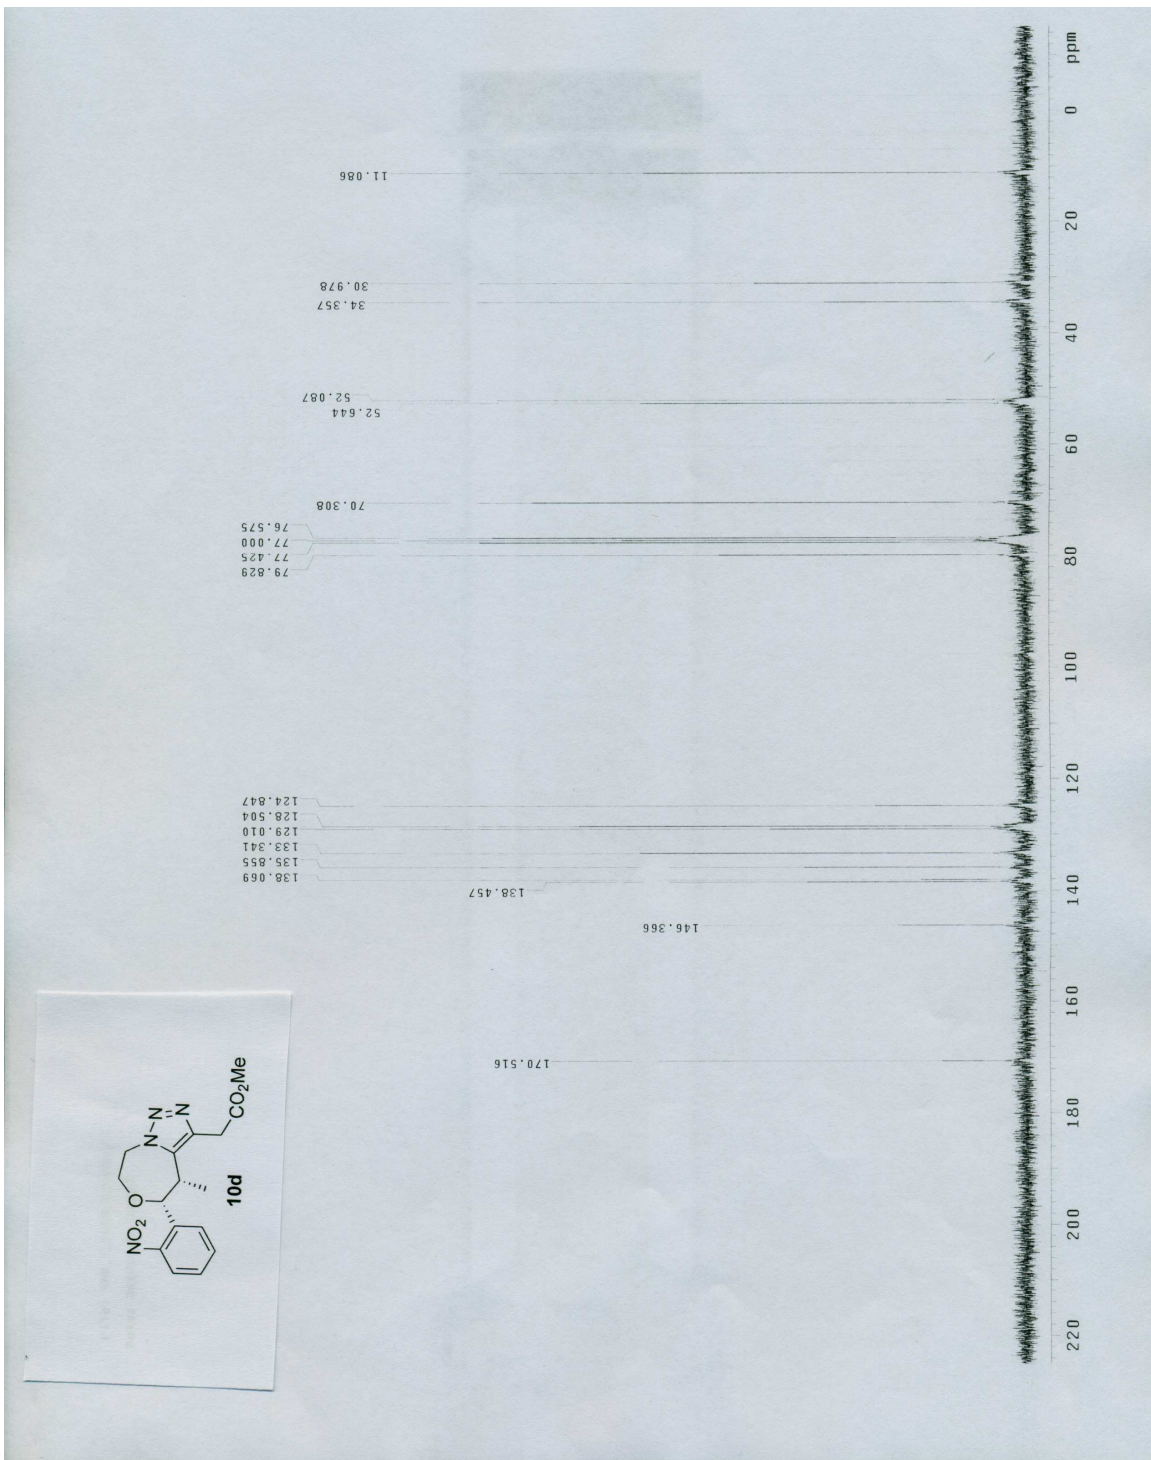

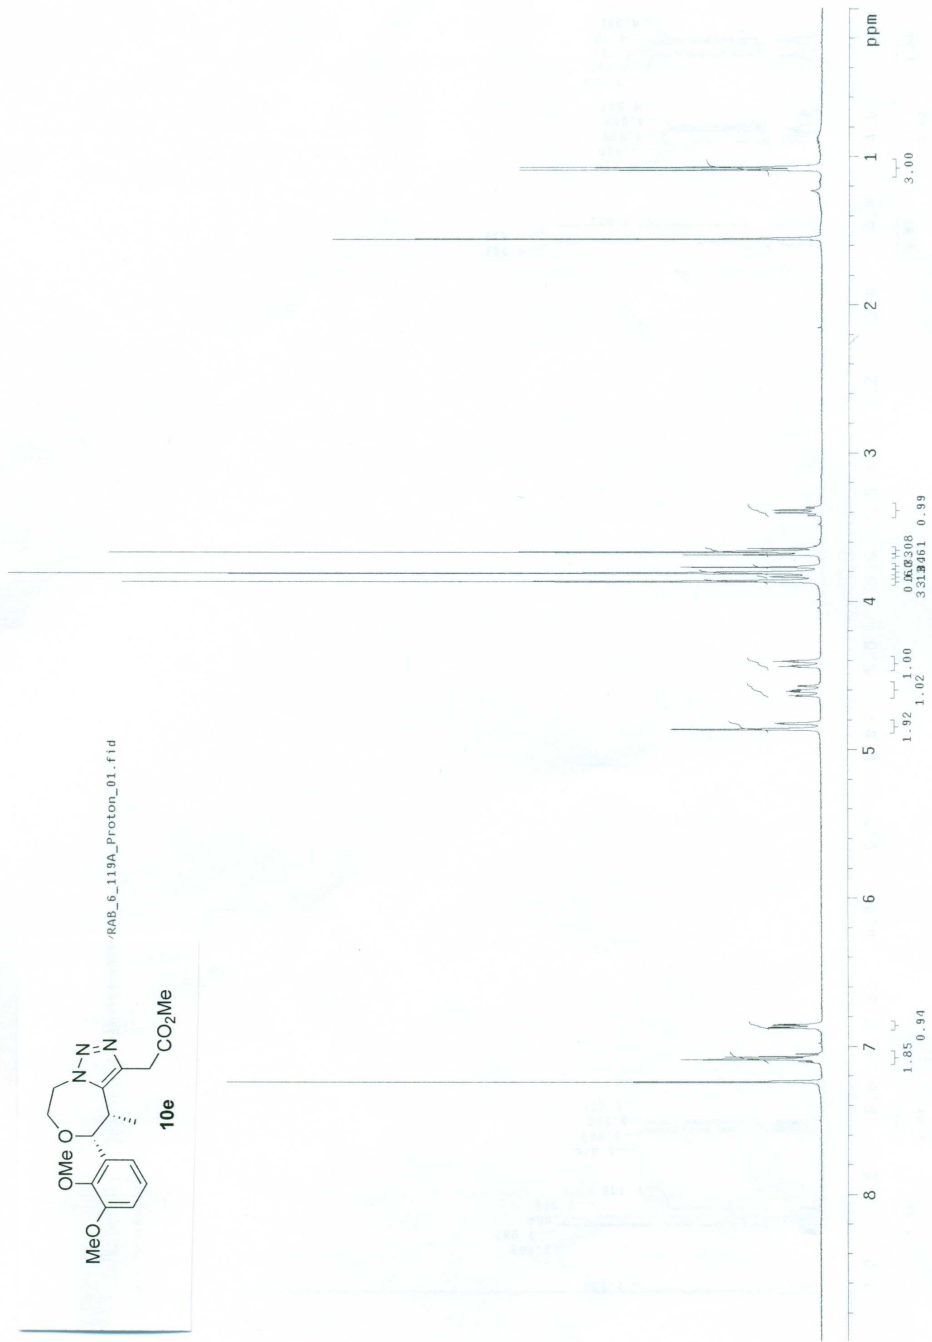

707/RAB\_E\_119A\_Carbon\_01.fid

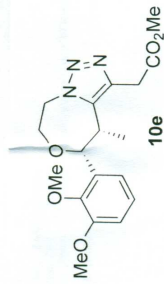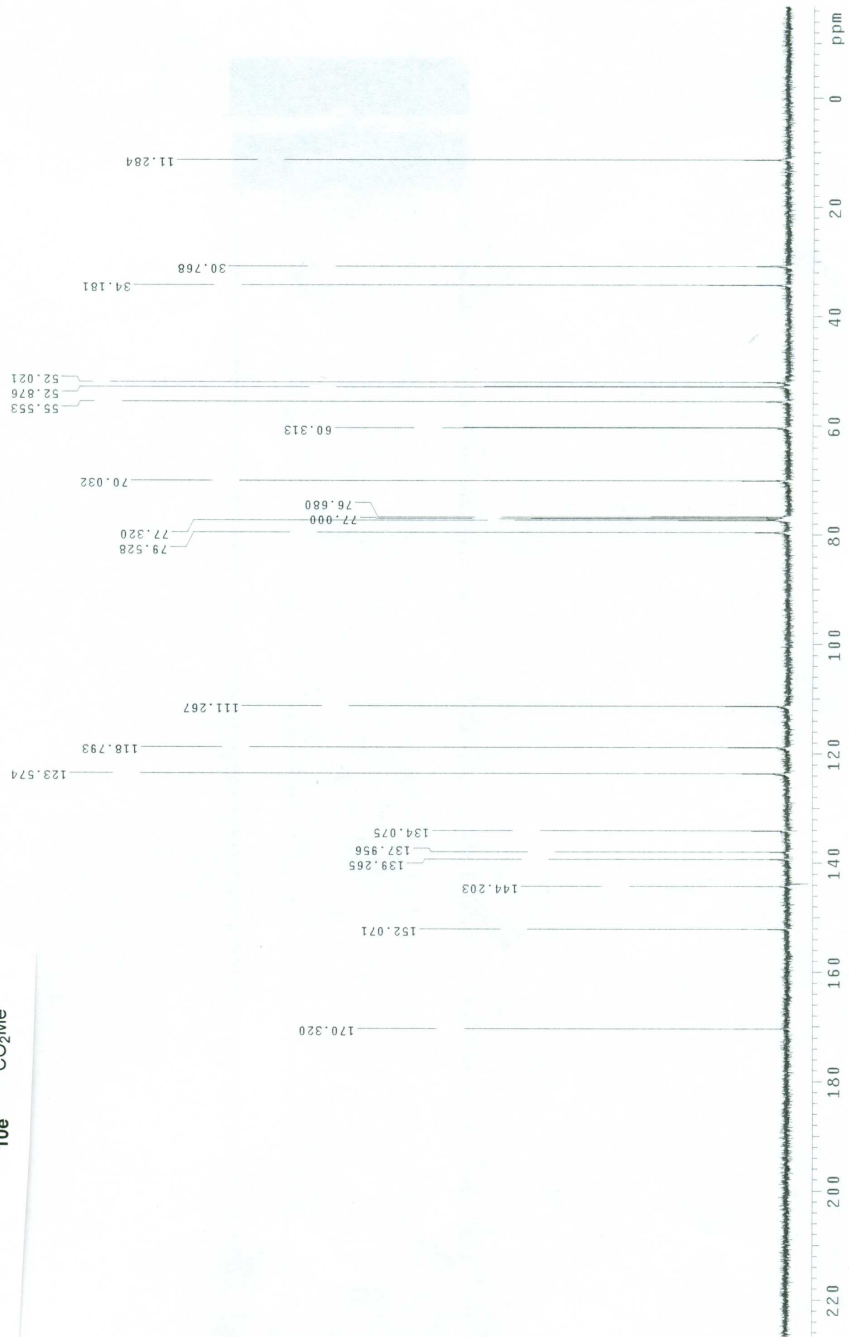

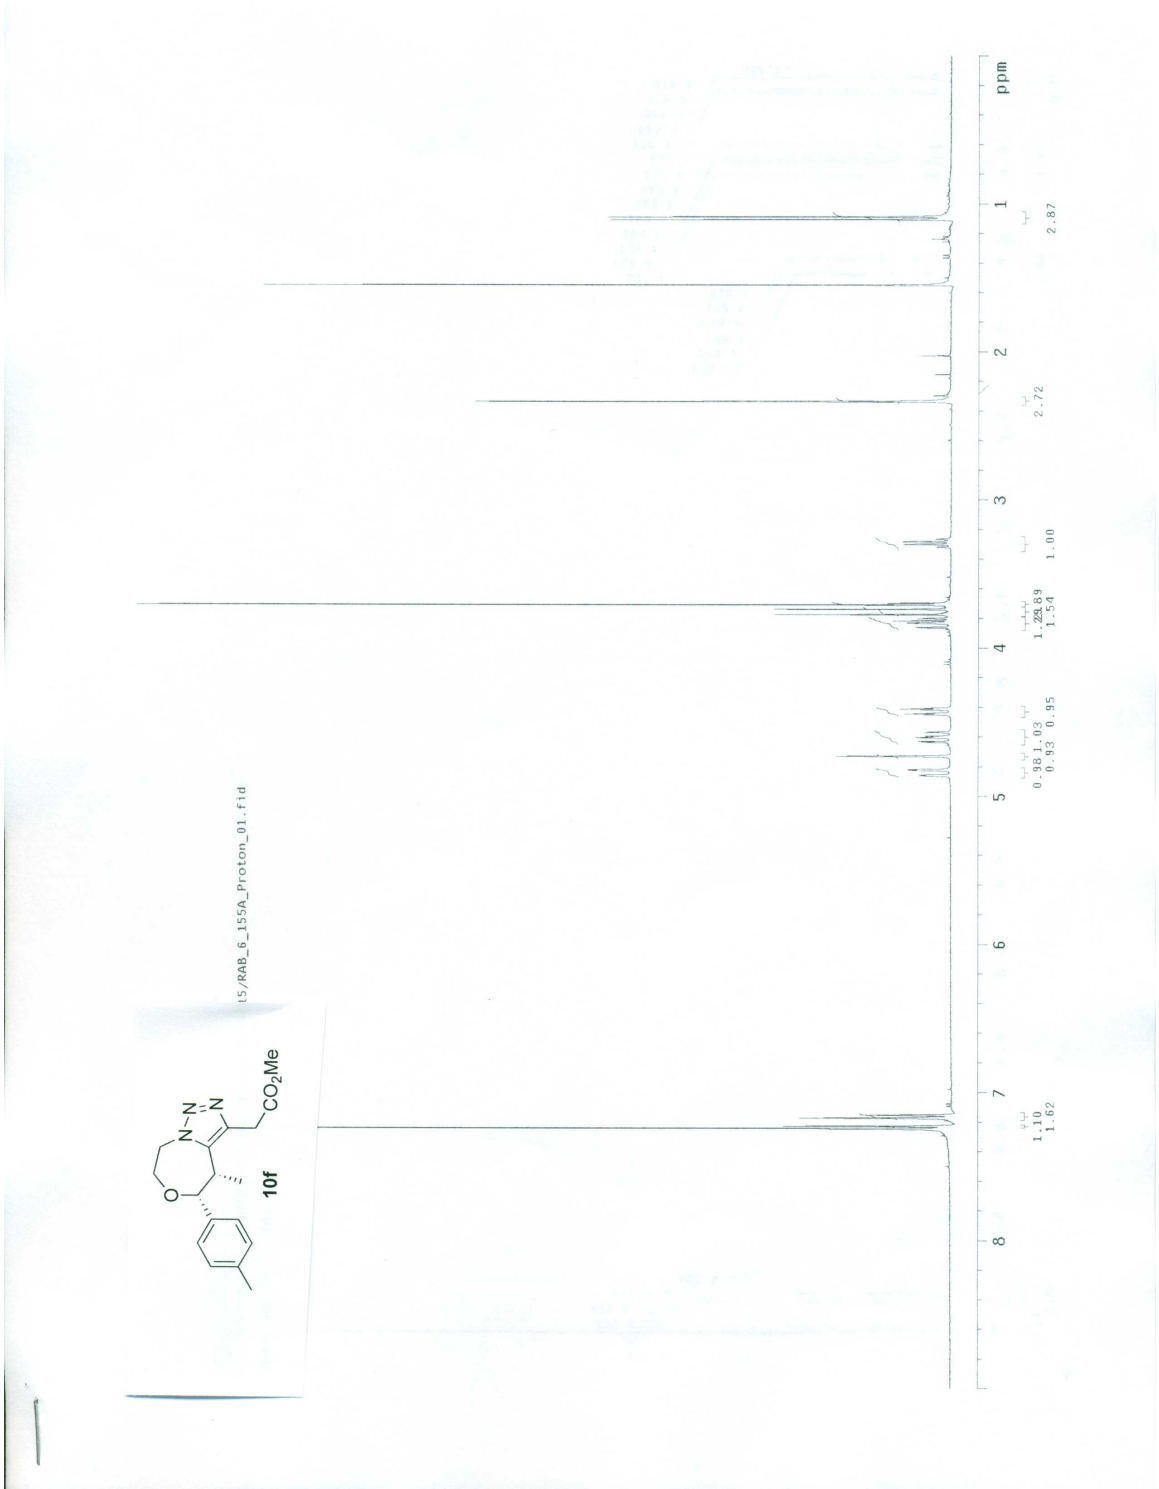

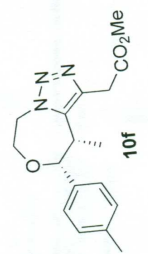

/nmr/sy/data/studies/auto\_2007\_04\_10\_02

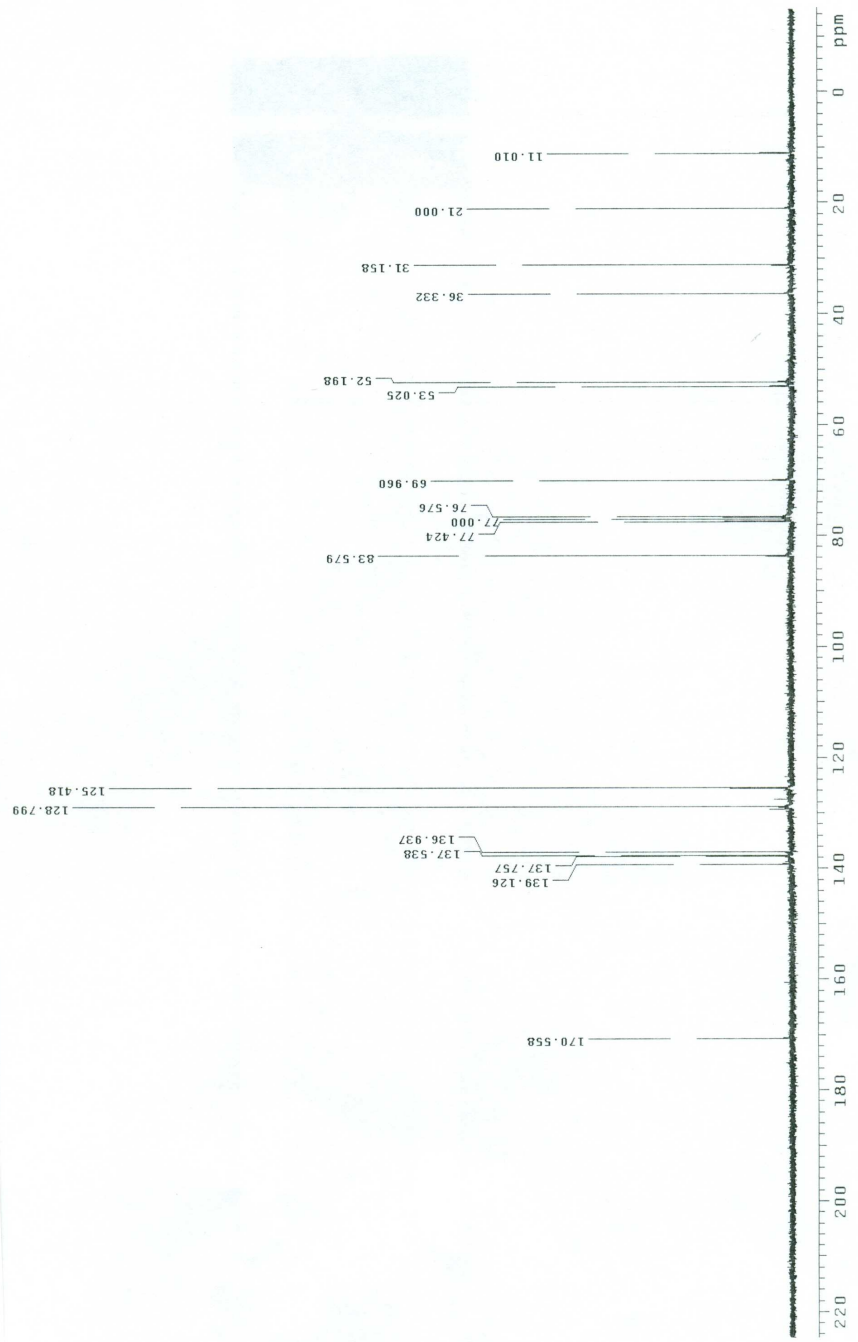

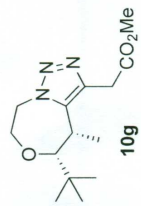

1./RAB\_6\_145B\_Proton\_01.fid

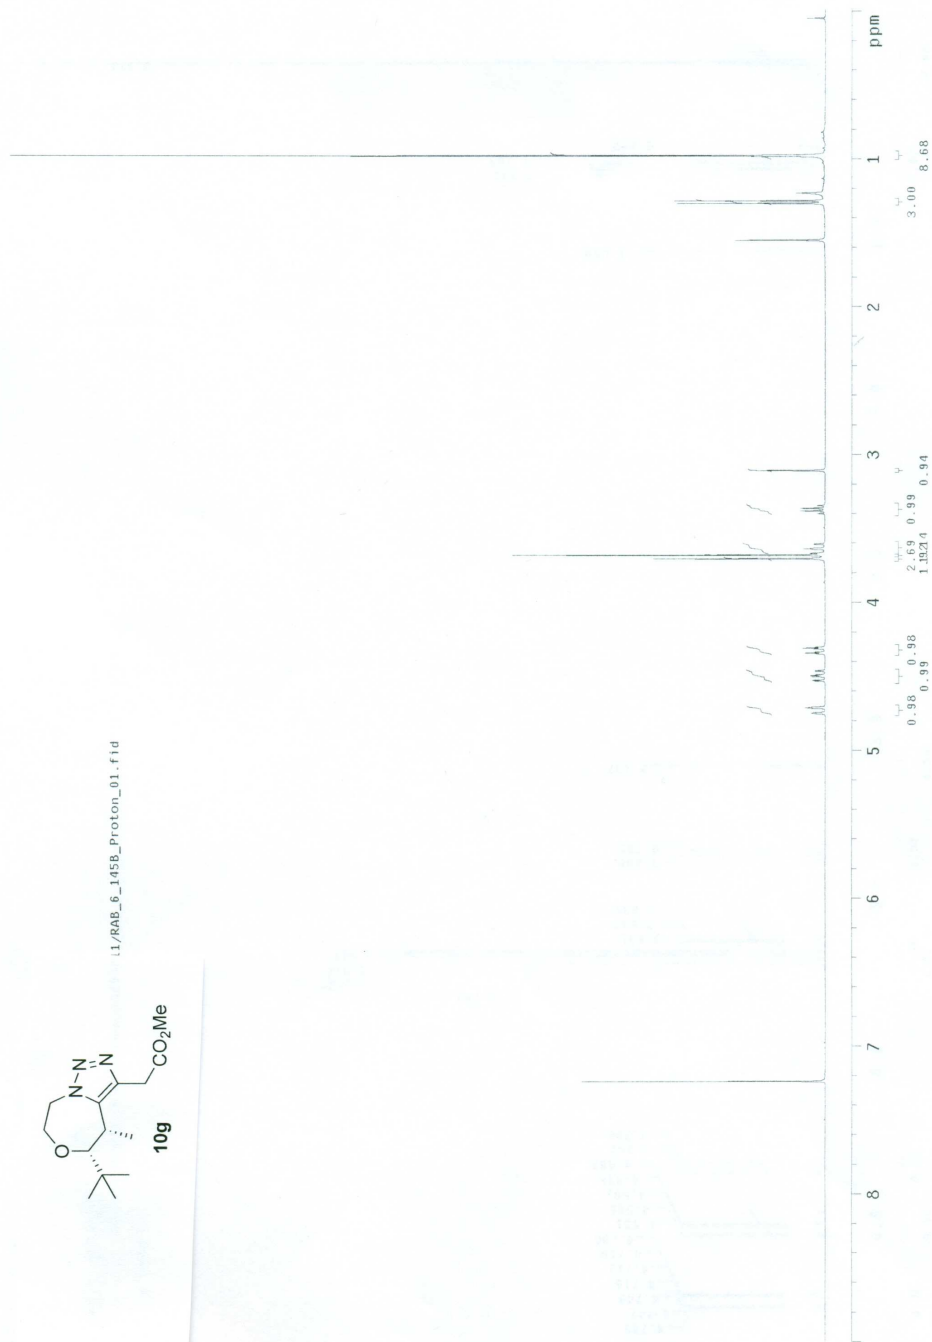

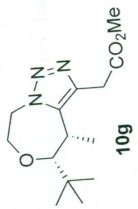

mr sys\data\s studies\auto\_2007\_04\_10\_02

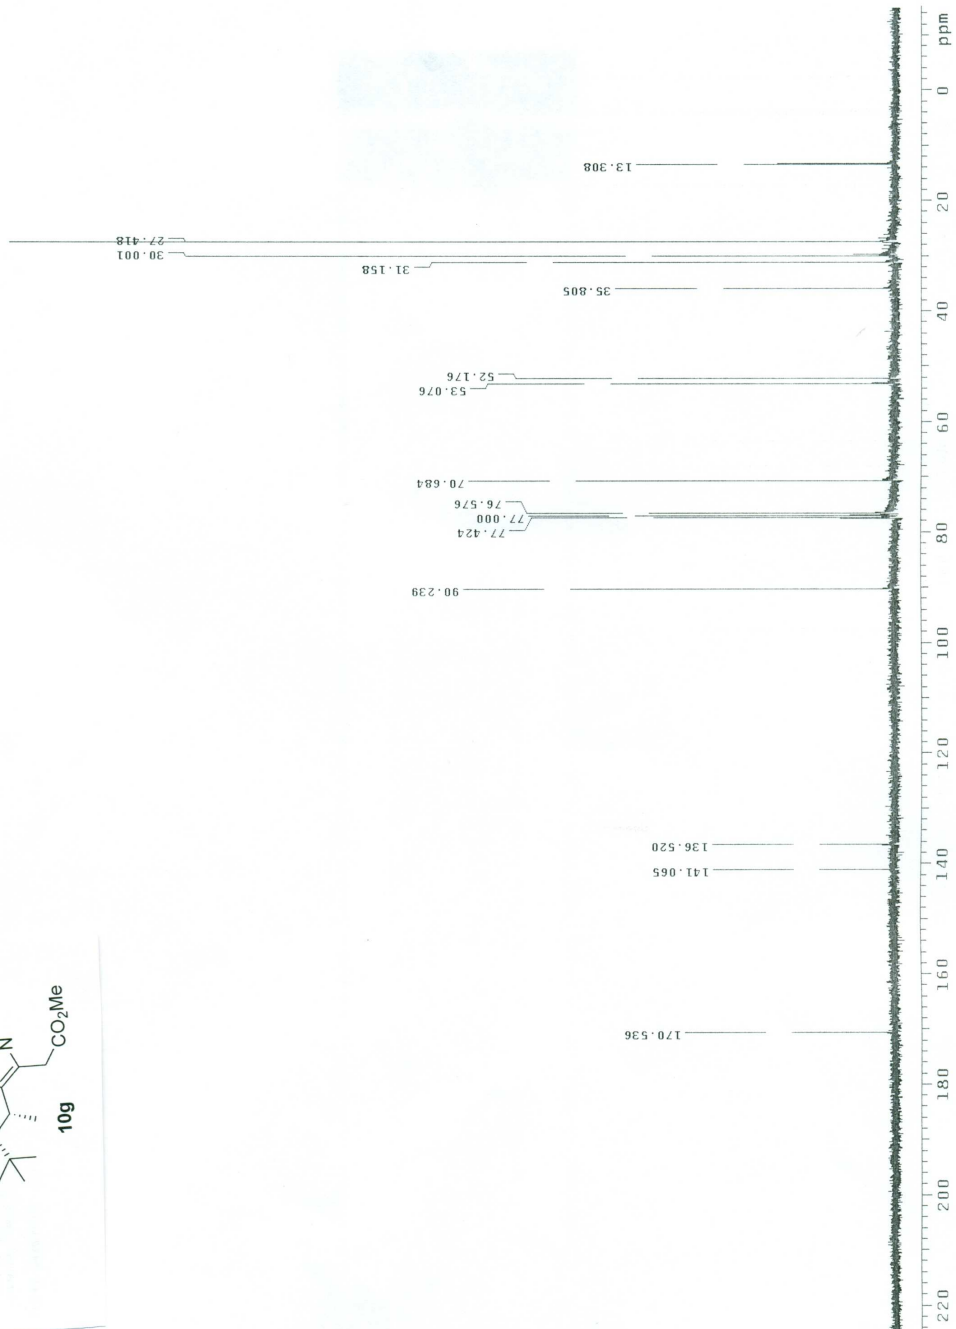

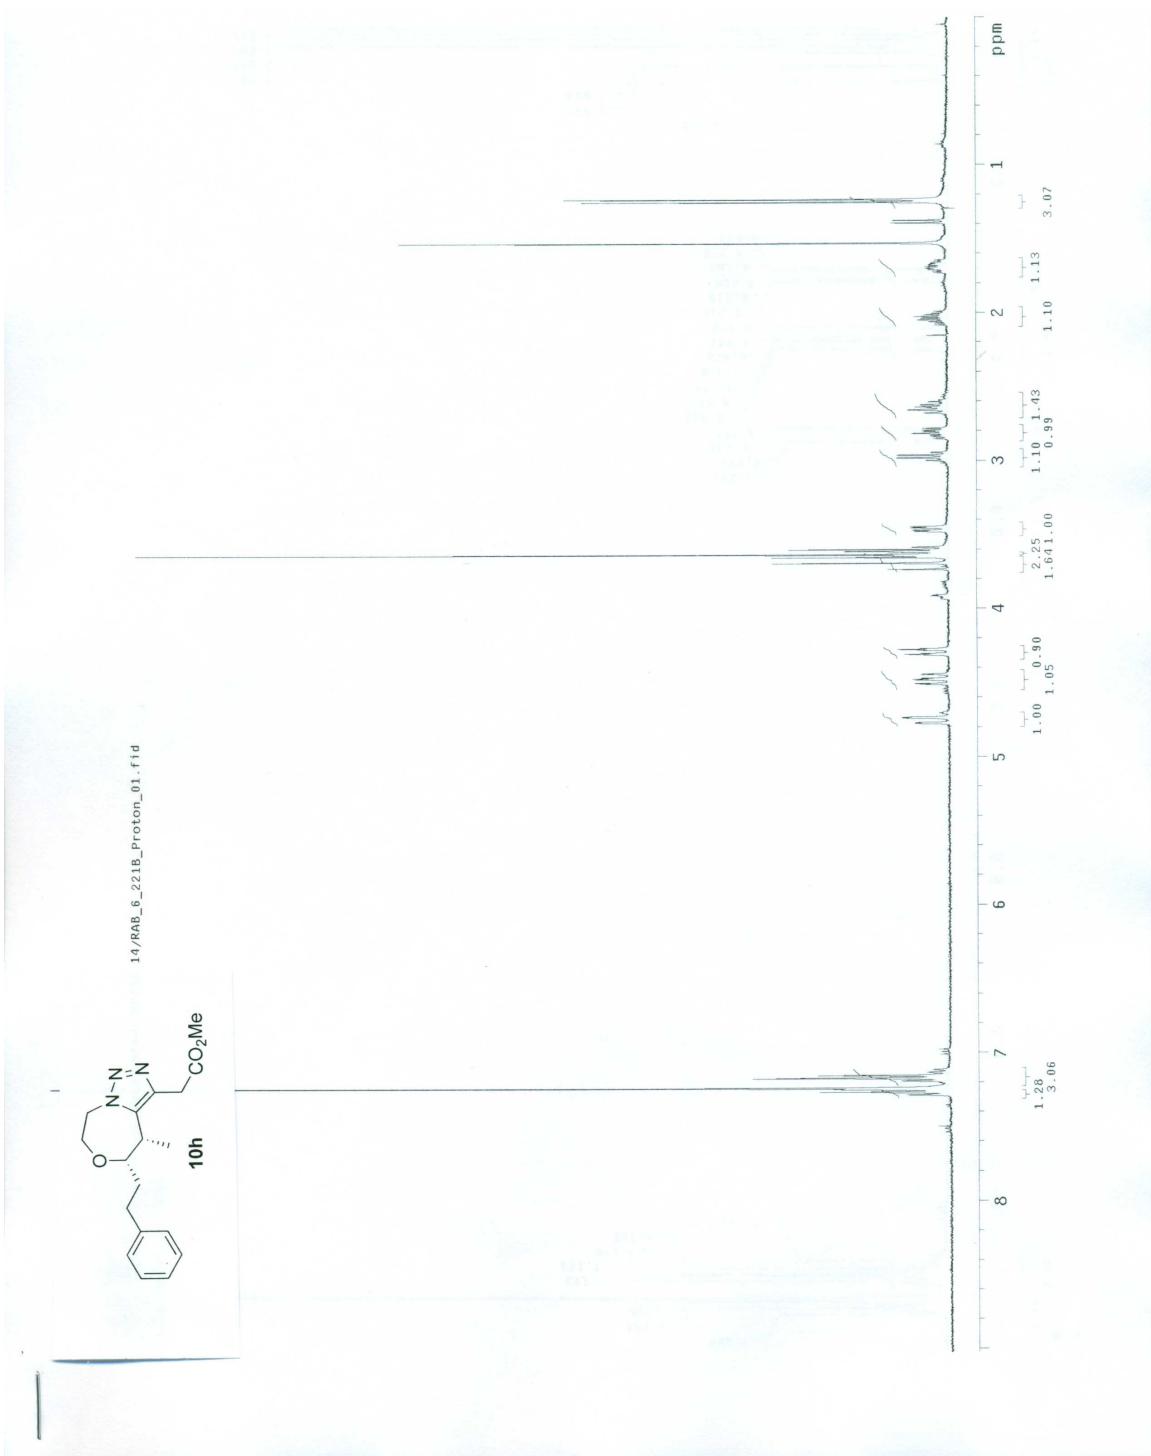



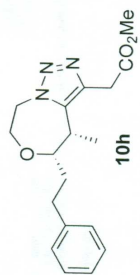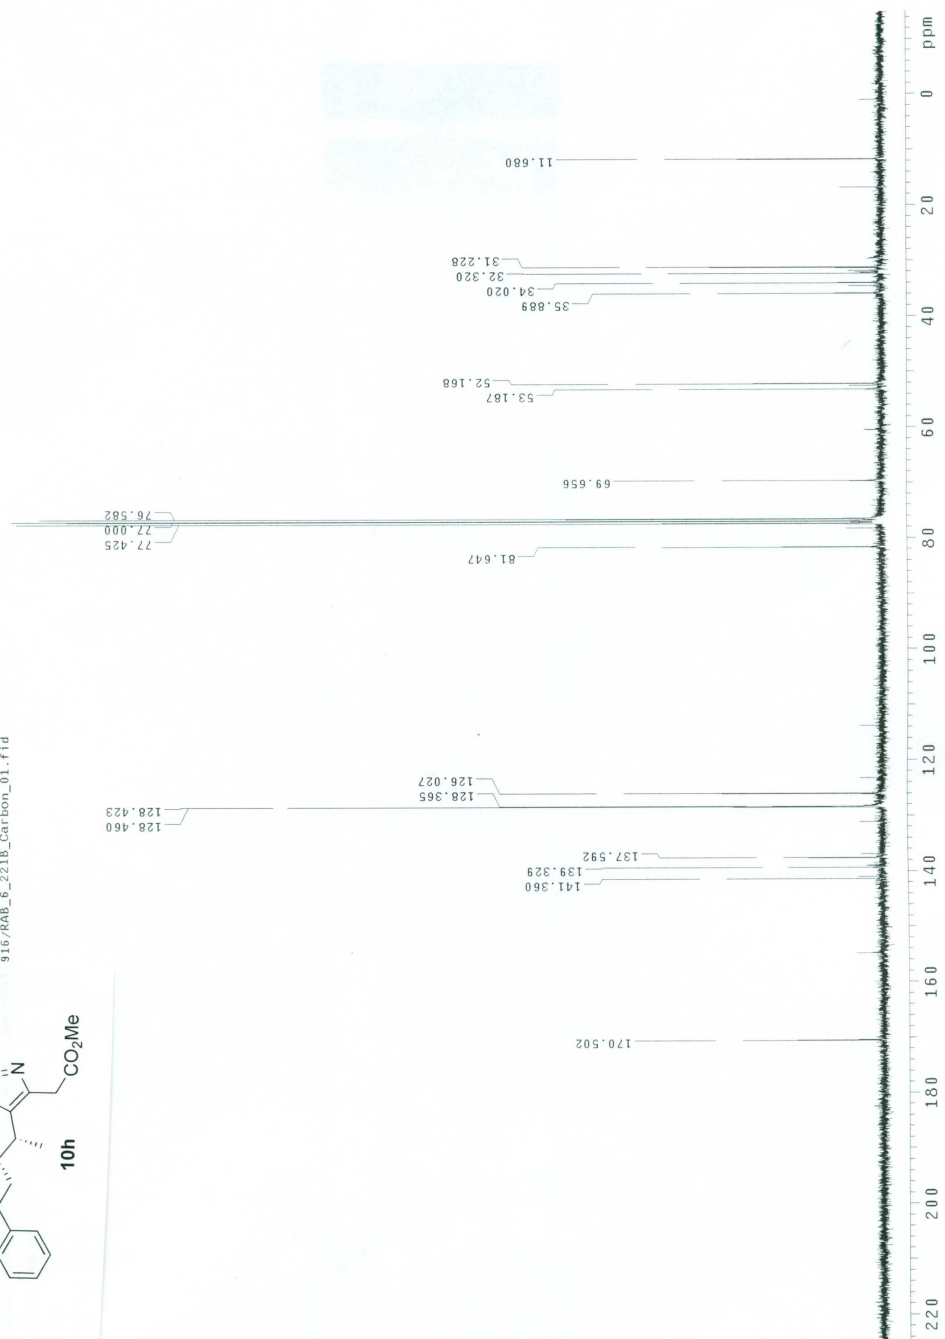

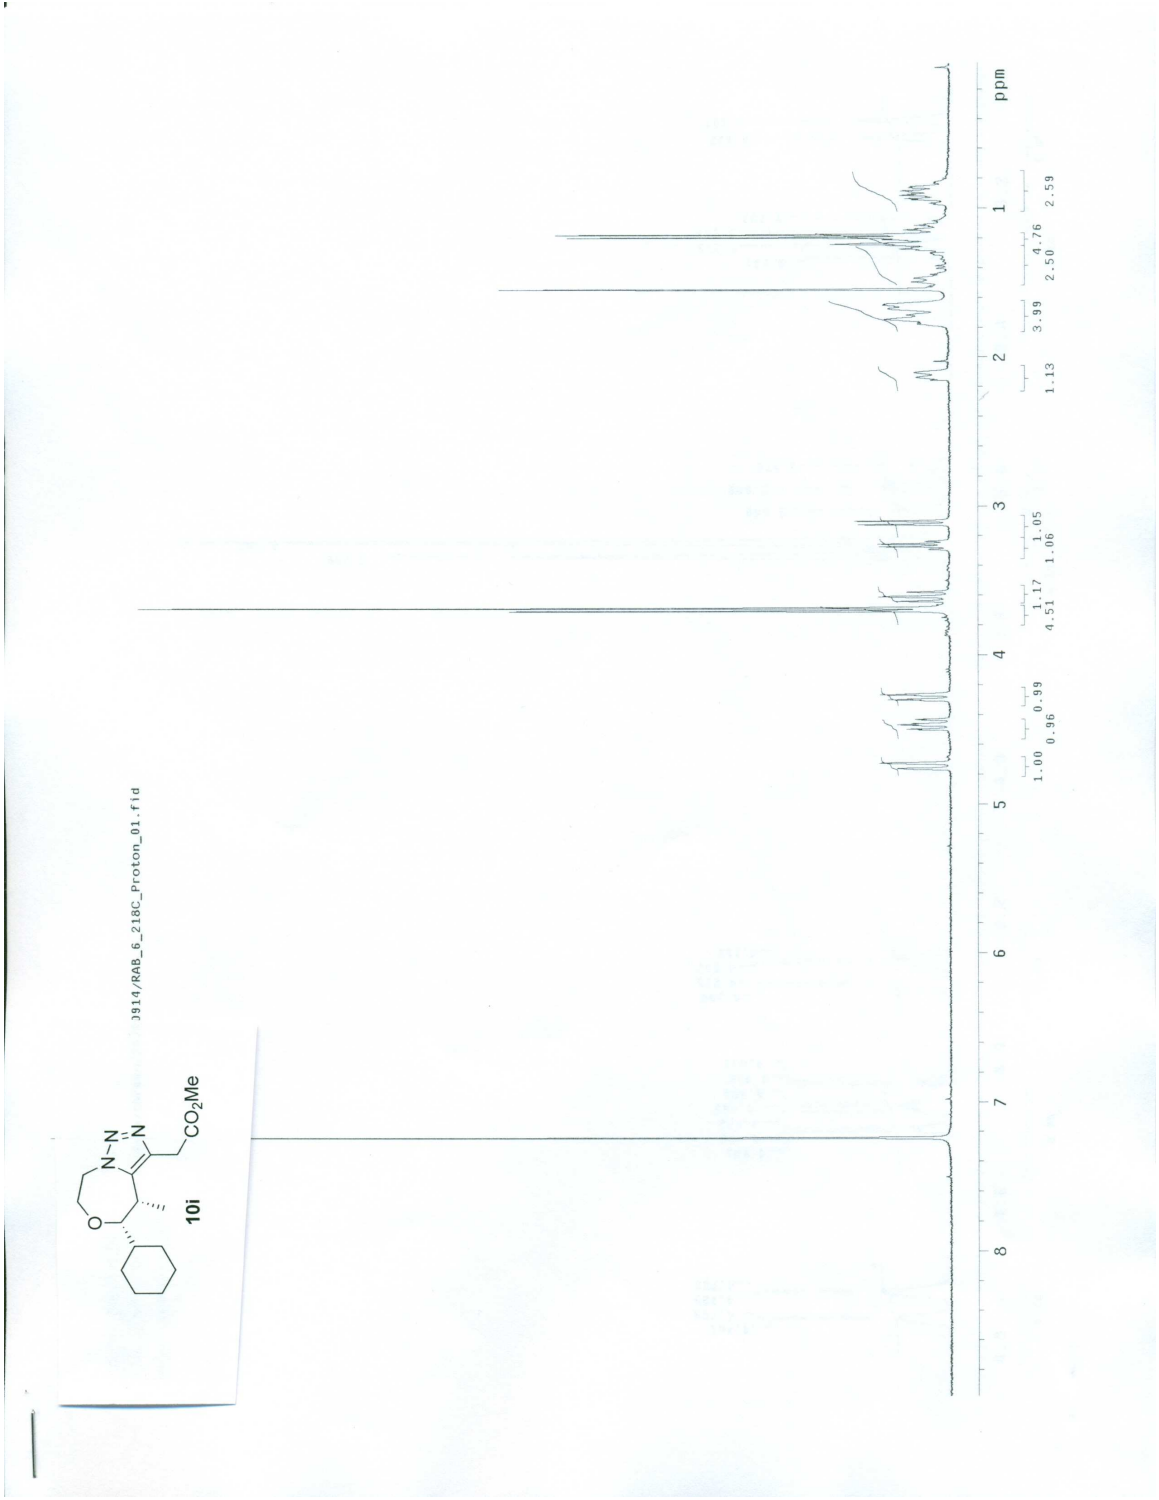

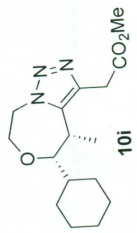

16/RAB\_6\_218C\_Carbon\_01.fid

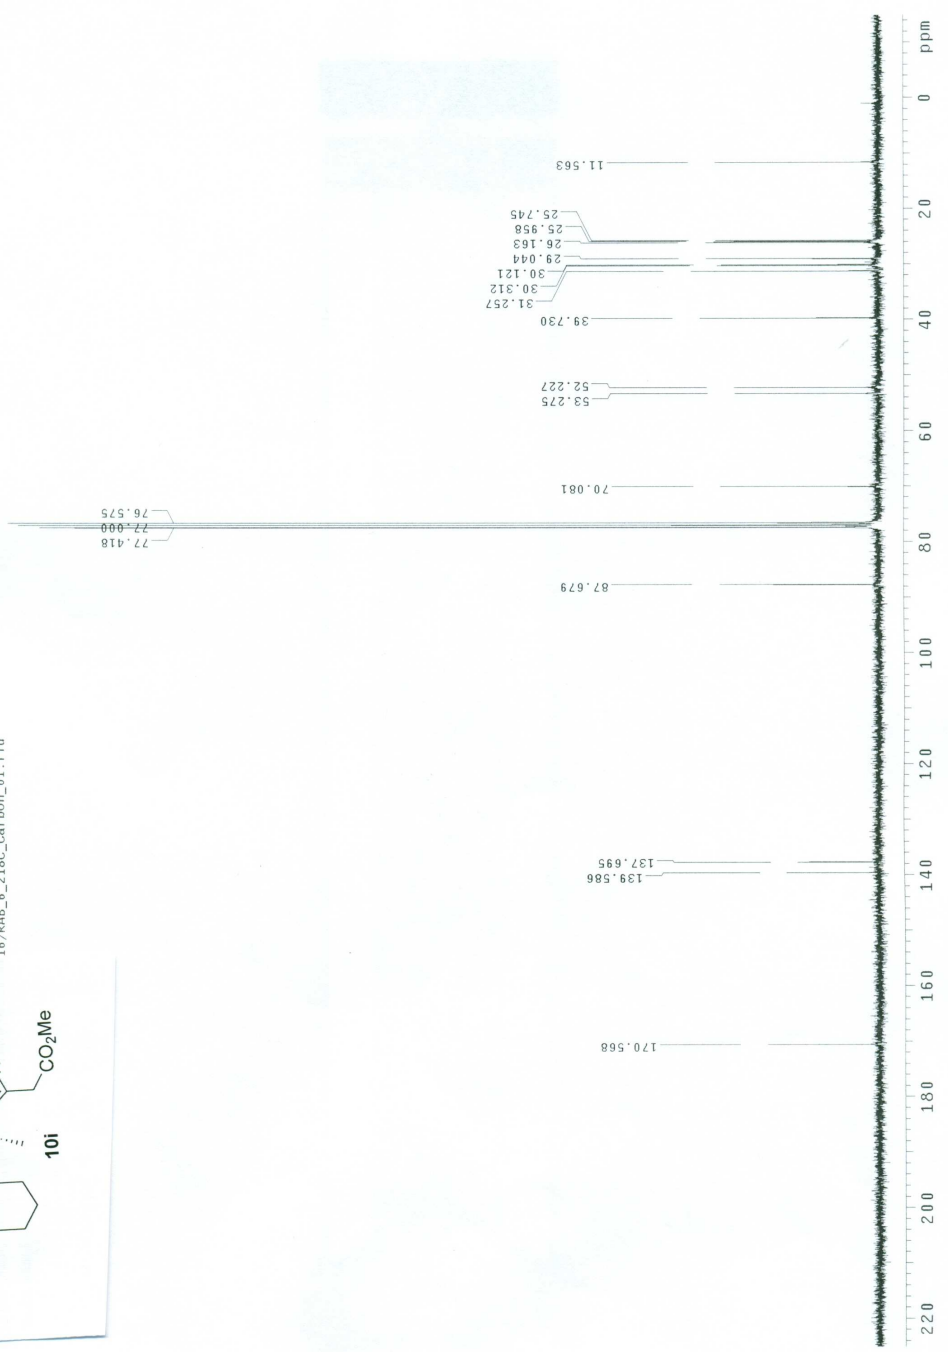

Supplement: NIHMS166168-supplement-2_si_002.pdf [file NIHMS166168-supplement-2_si_002.pdf]
