# Supplementary material
Source: PubMed Central journal article supplement (PMC3164318)

Supporting Information 3:

## **Regioselective Intramolecular Dipolar Cycloaddition of Azides and Unsymmetrical Alkynes**

Ryan A. Brawn, Morgan Welzel, Jason T. Lowe, and James S. Panek\*

Department of Chemistry and Center for Chemical Methodology and Library Development,  
Metcalf Center for Science and Engineering, 590 Commonwealth Avenue, Boston University,  
Boston, Massachusetts 02215

**$^1\text{H}$  and  $^{13}\text{C}$  NMR spectra for all new compounds:**

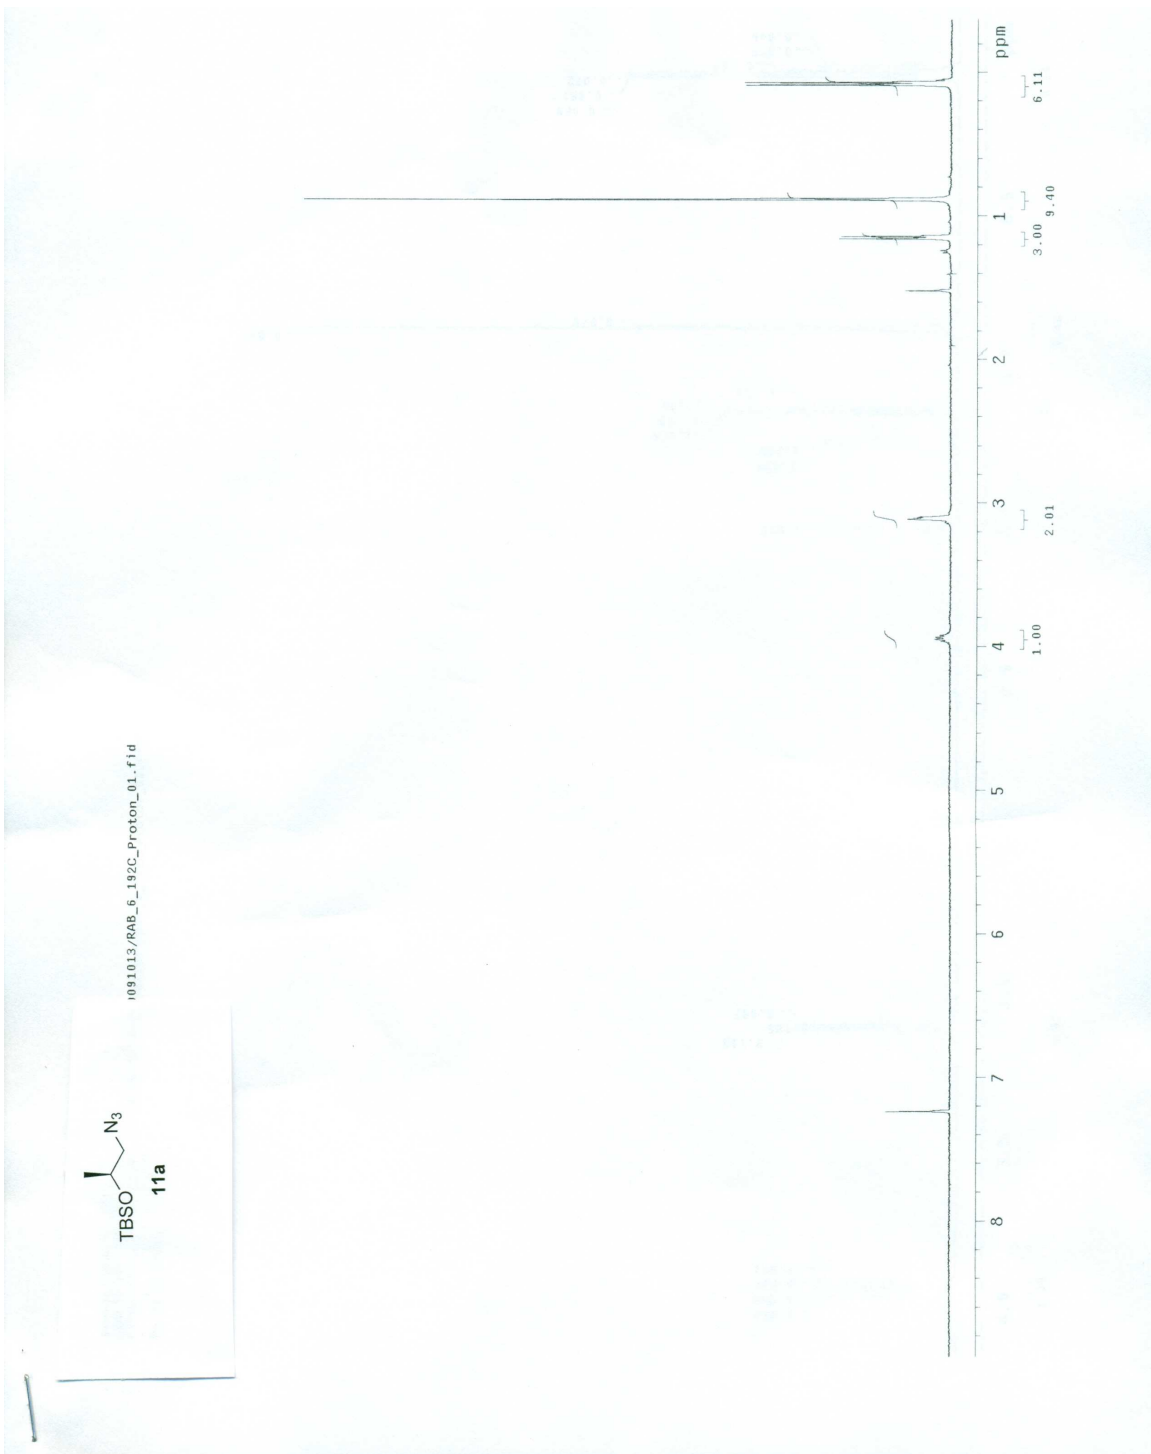

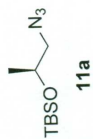

0091014/RAB\_5\_192C\_Carbon\_01.f1d

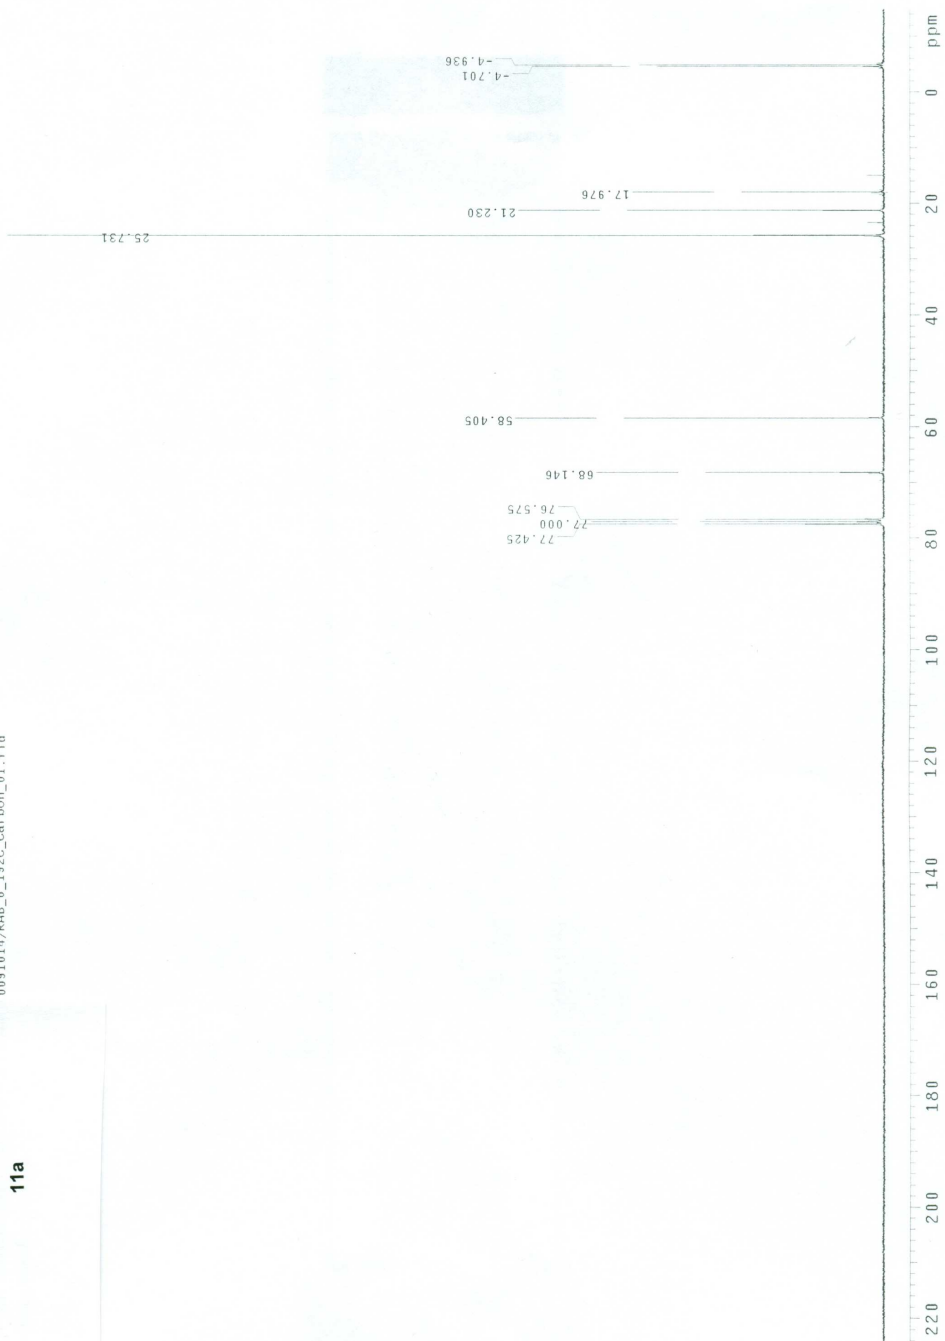

390902/RAB\_6\_2076\_Proton\_01.fid

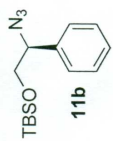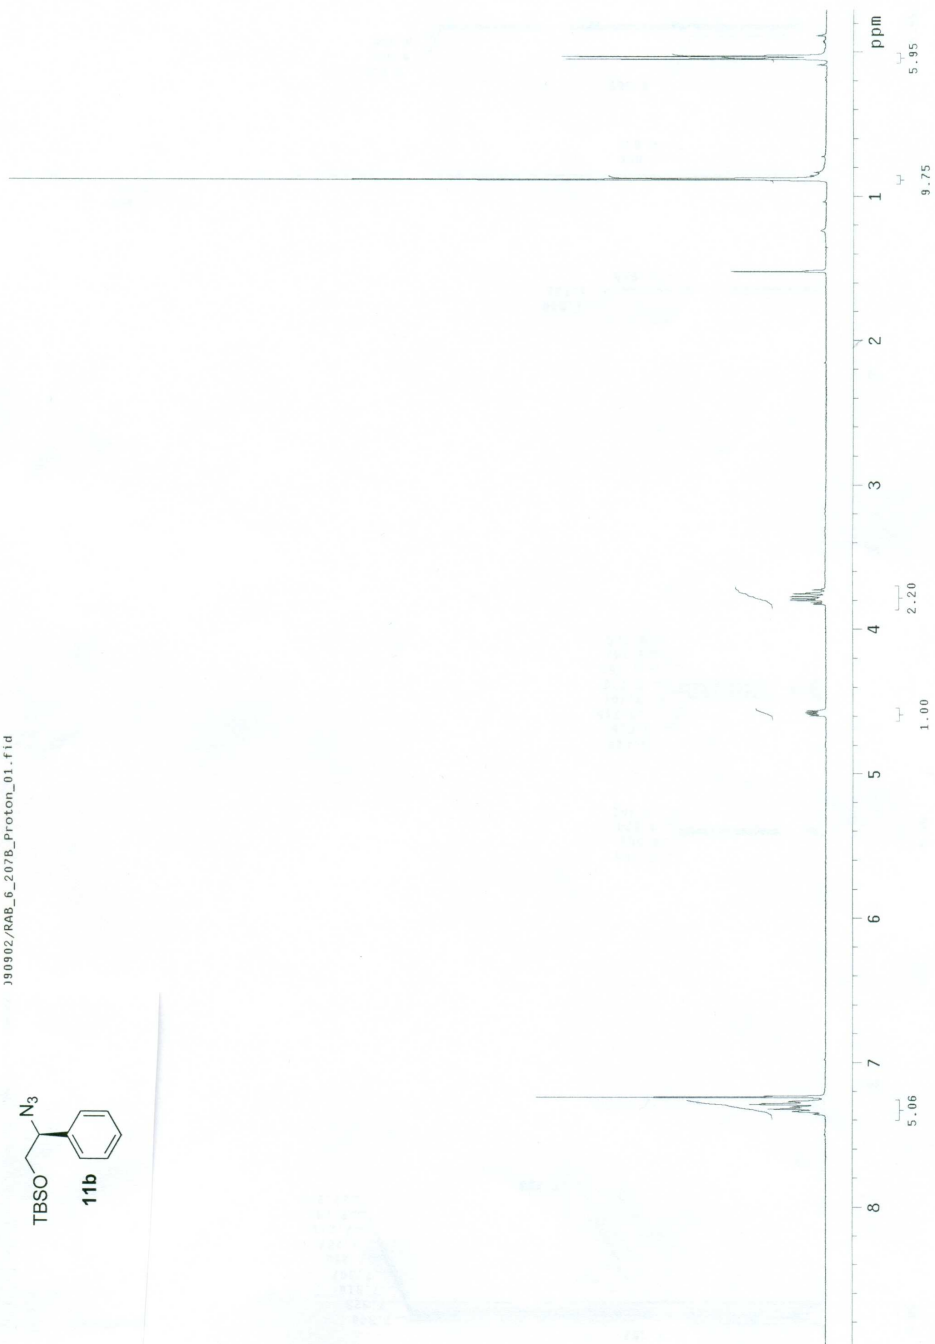

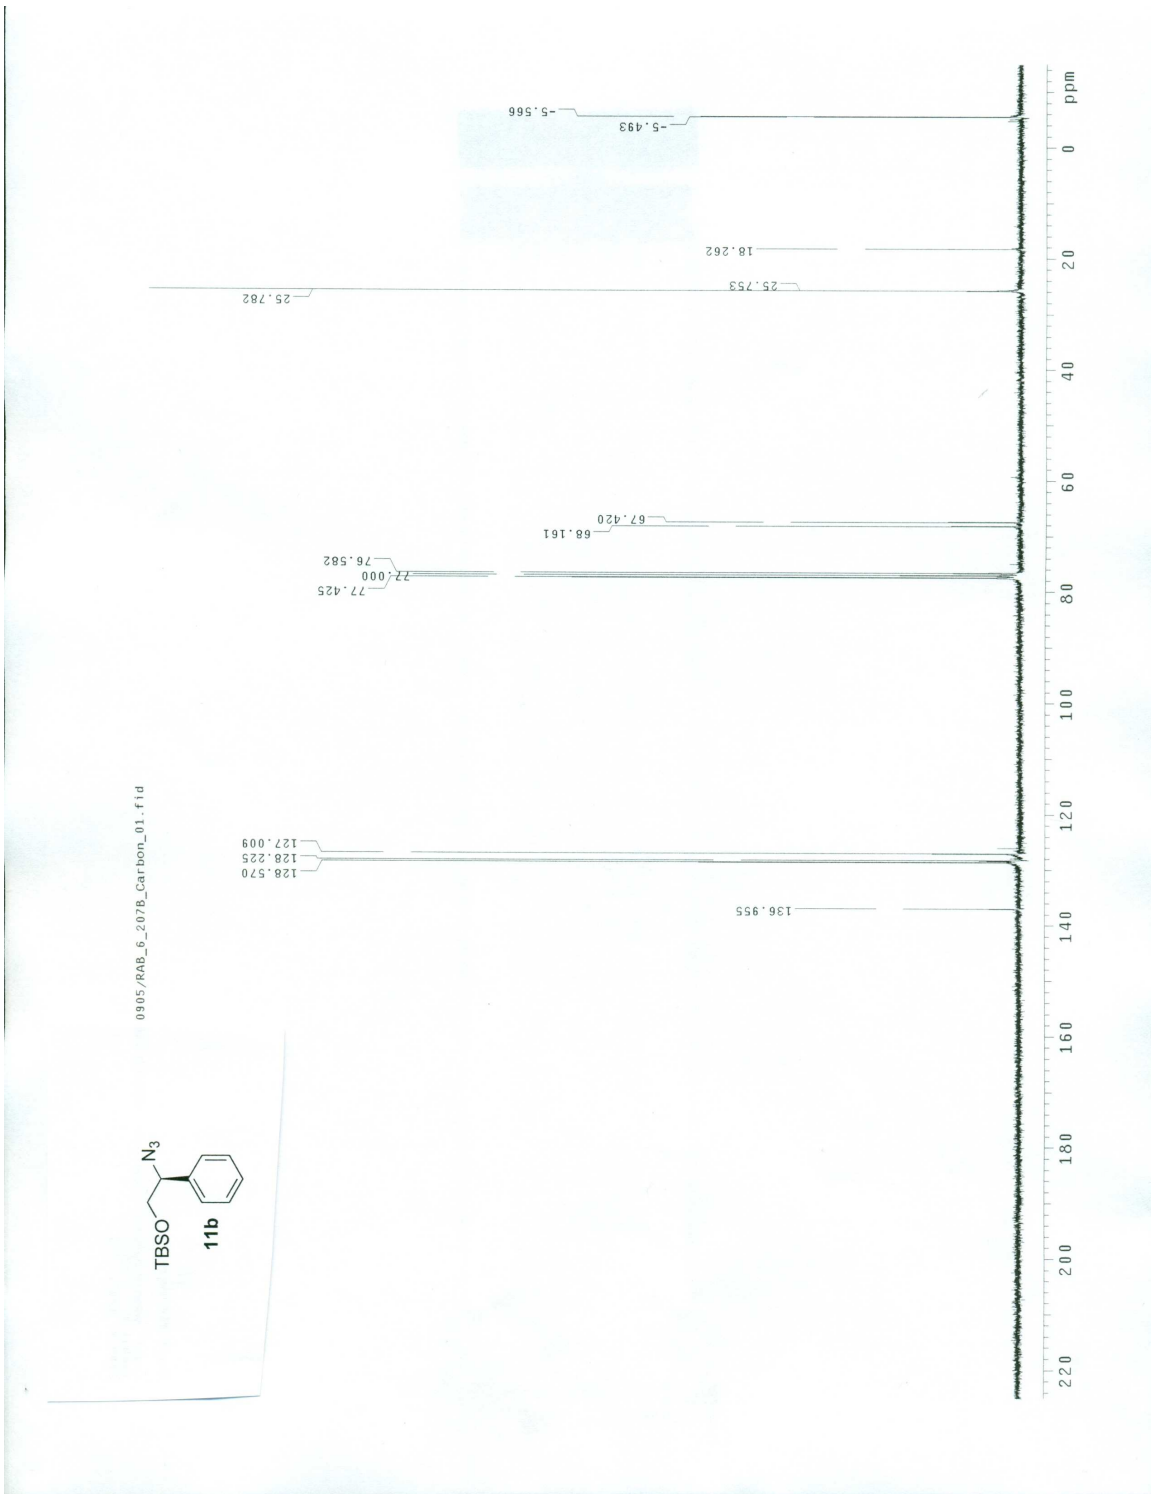

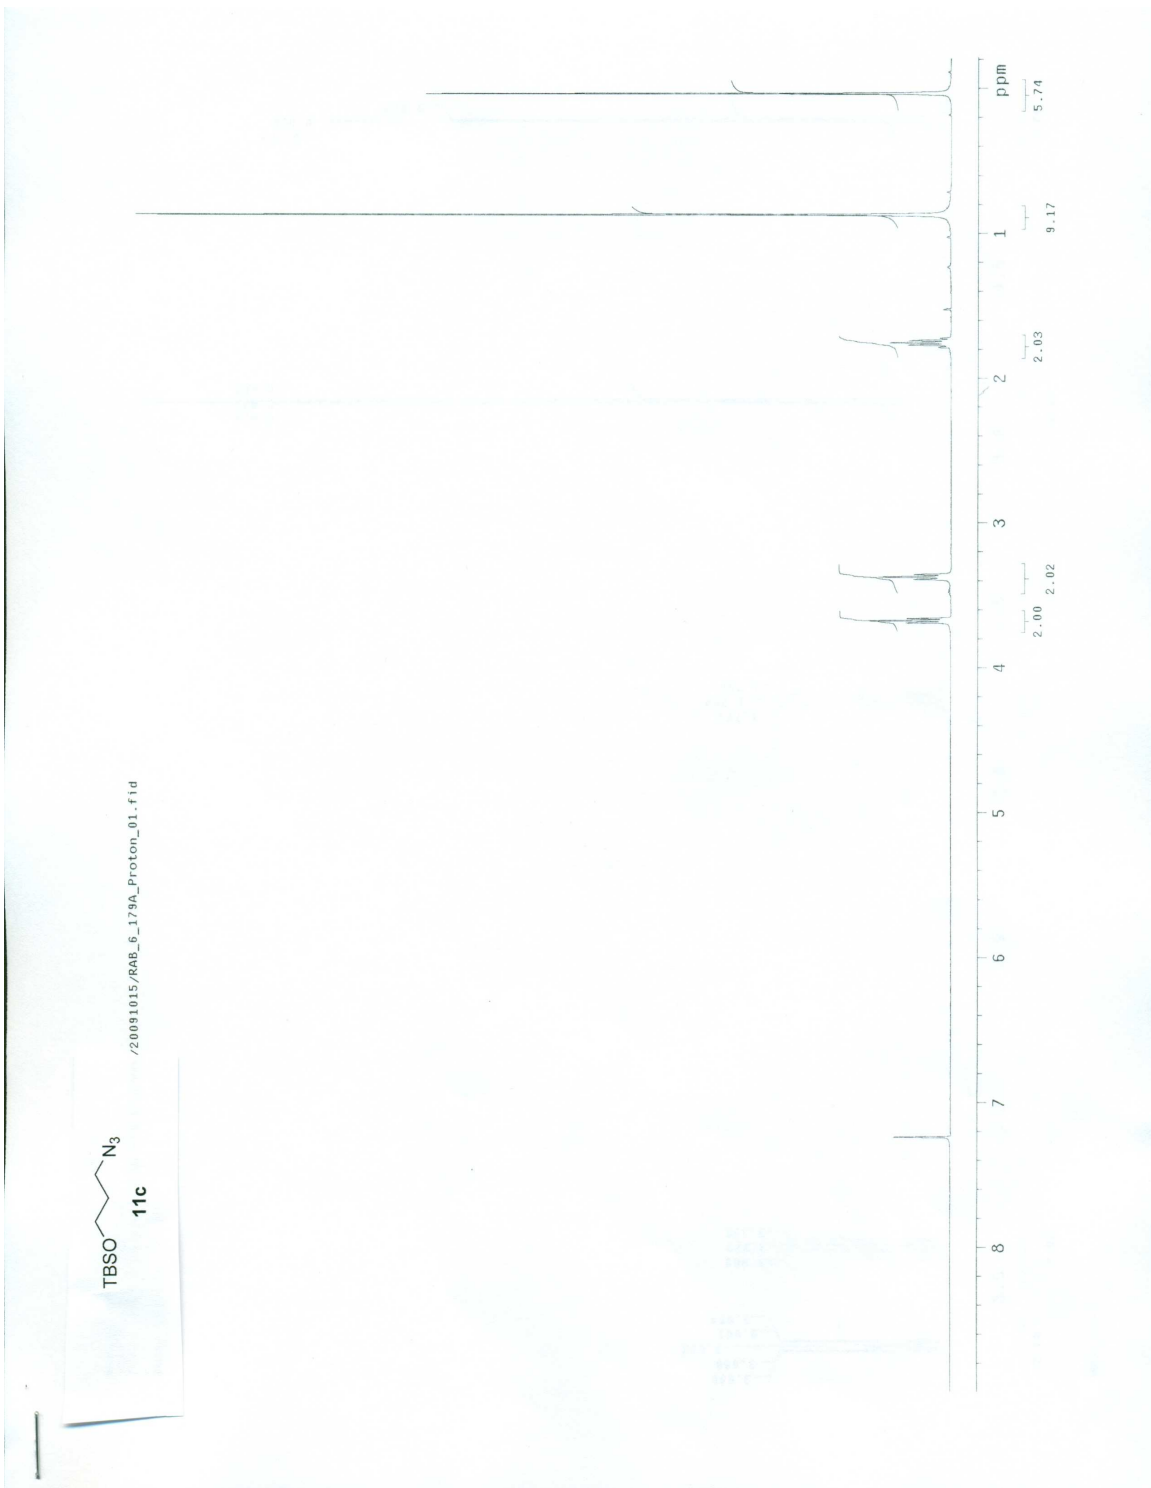

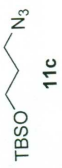

20091017/R08\_6\_179A\_Carbon\_01.fid

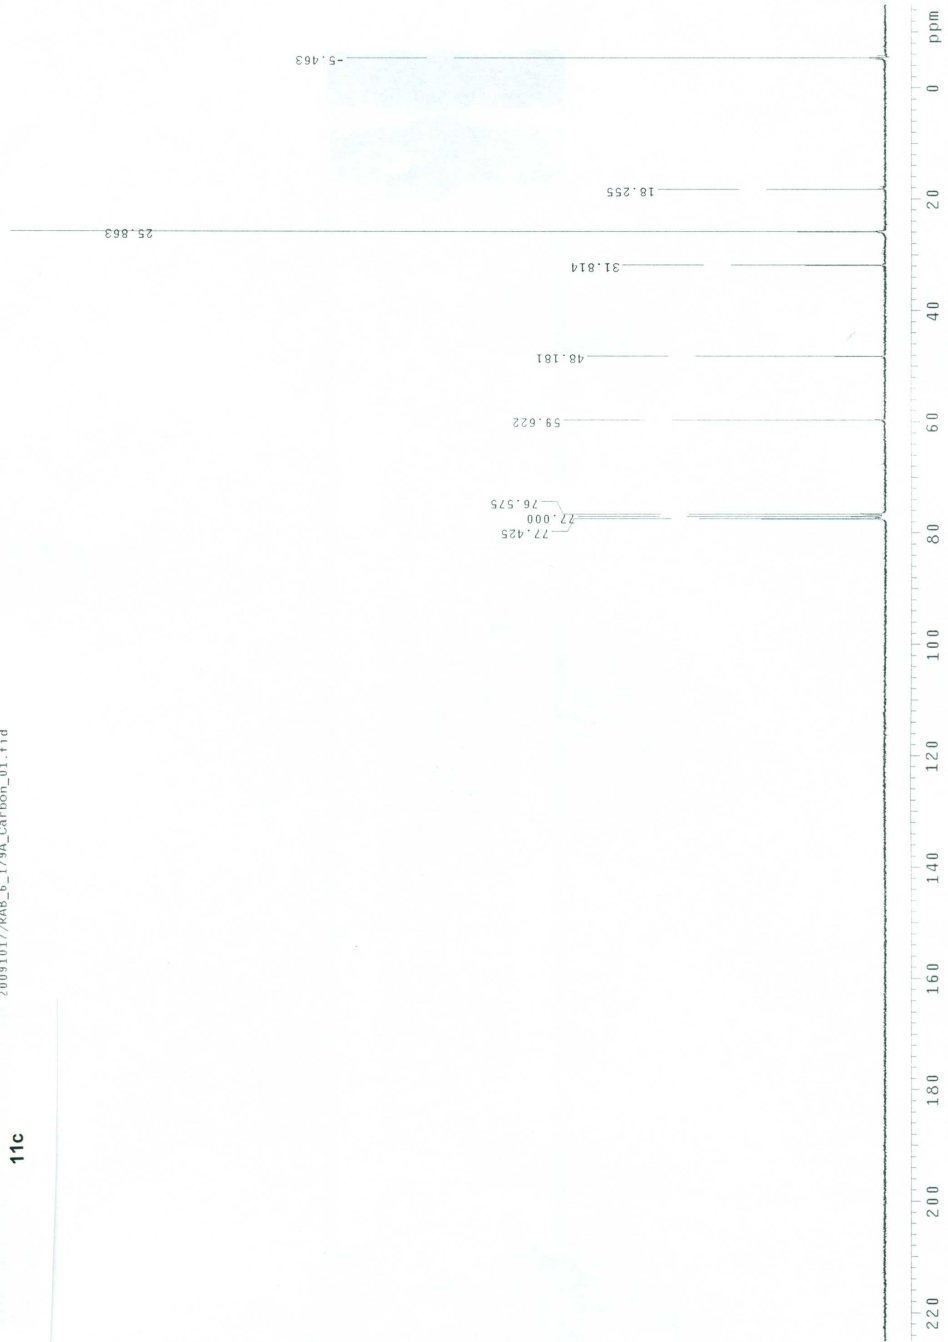

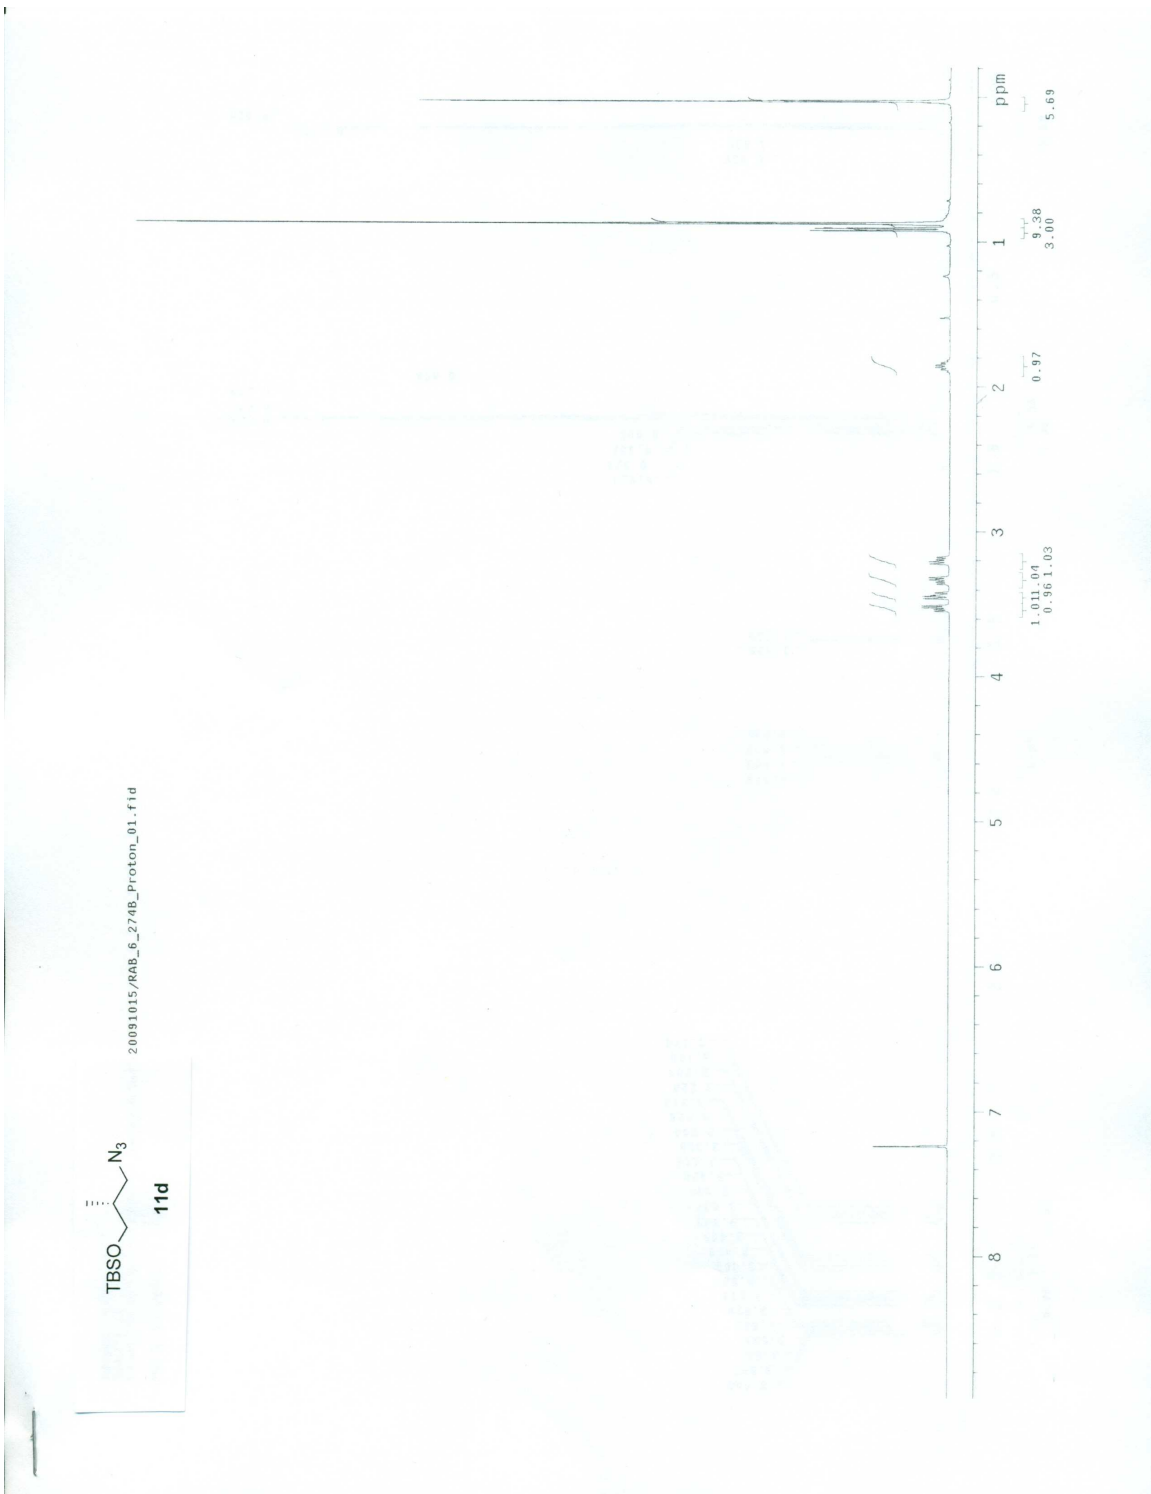



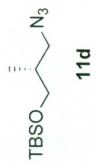

0091017/RAB\_6\_274B\_Carbon\_01.f1d

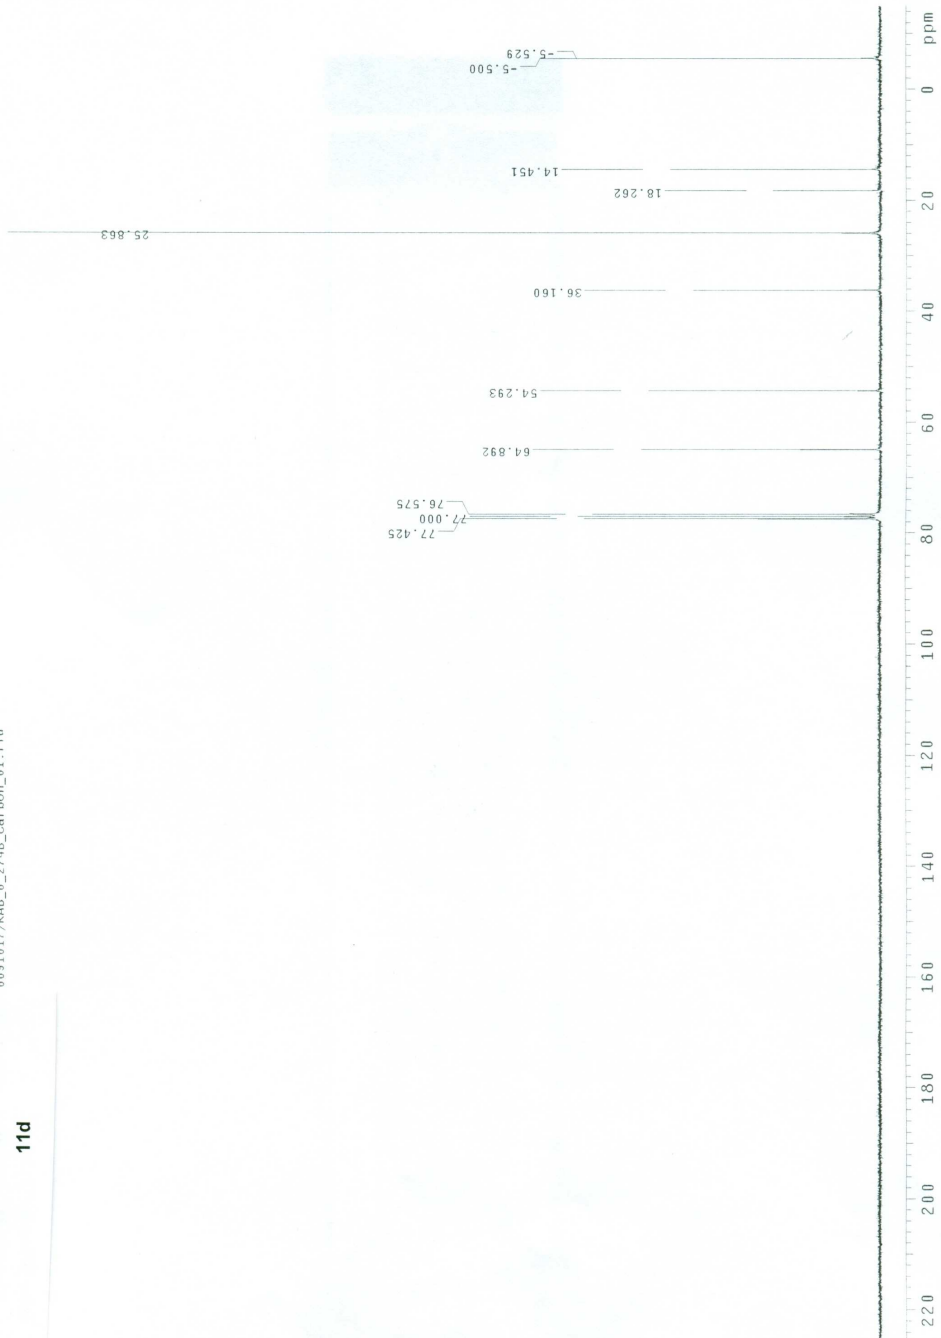

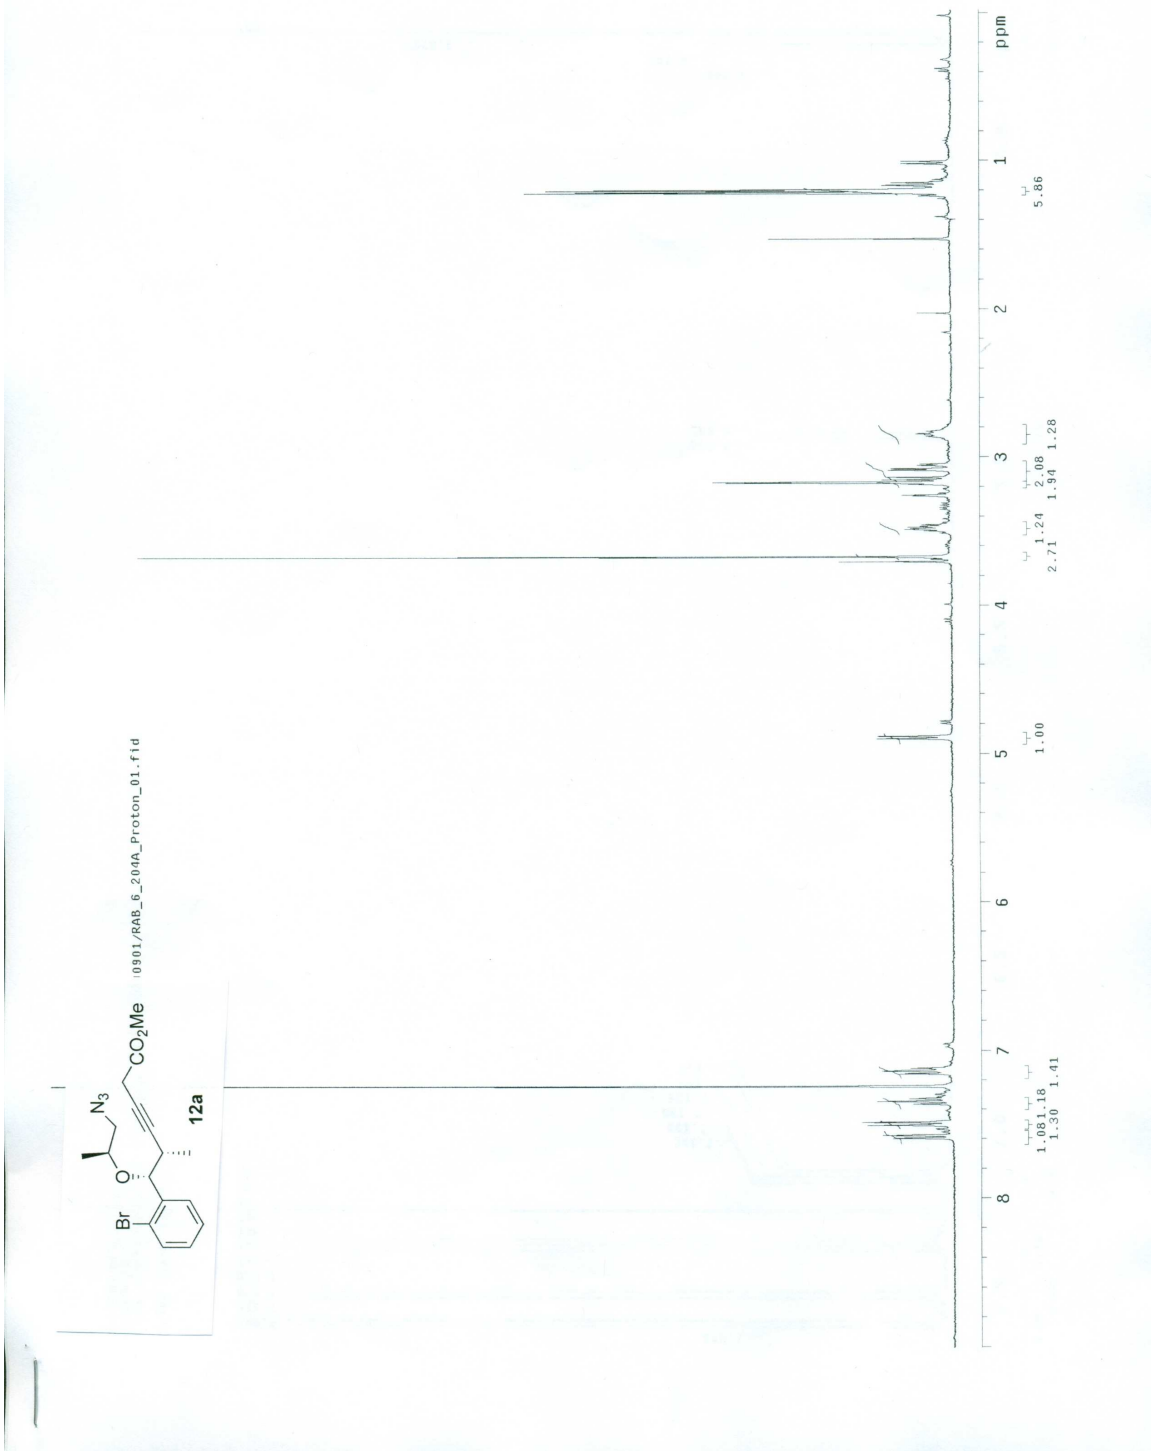

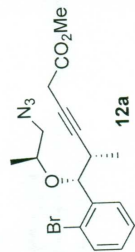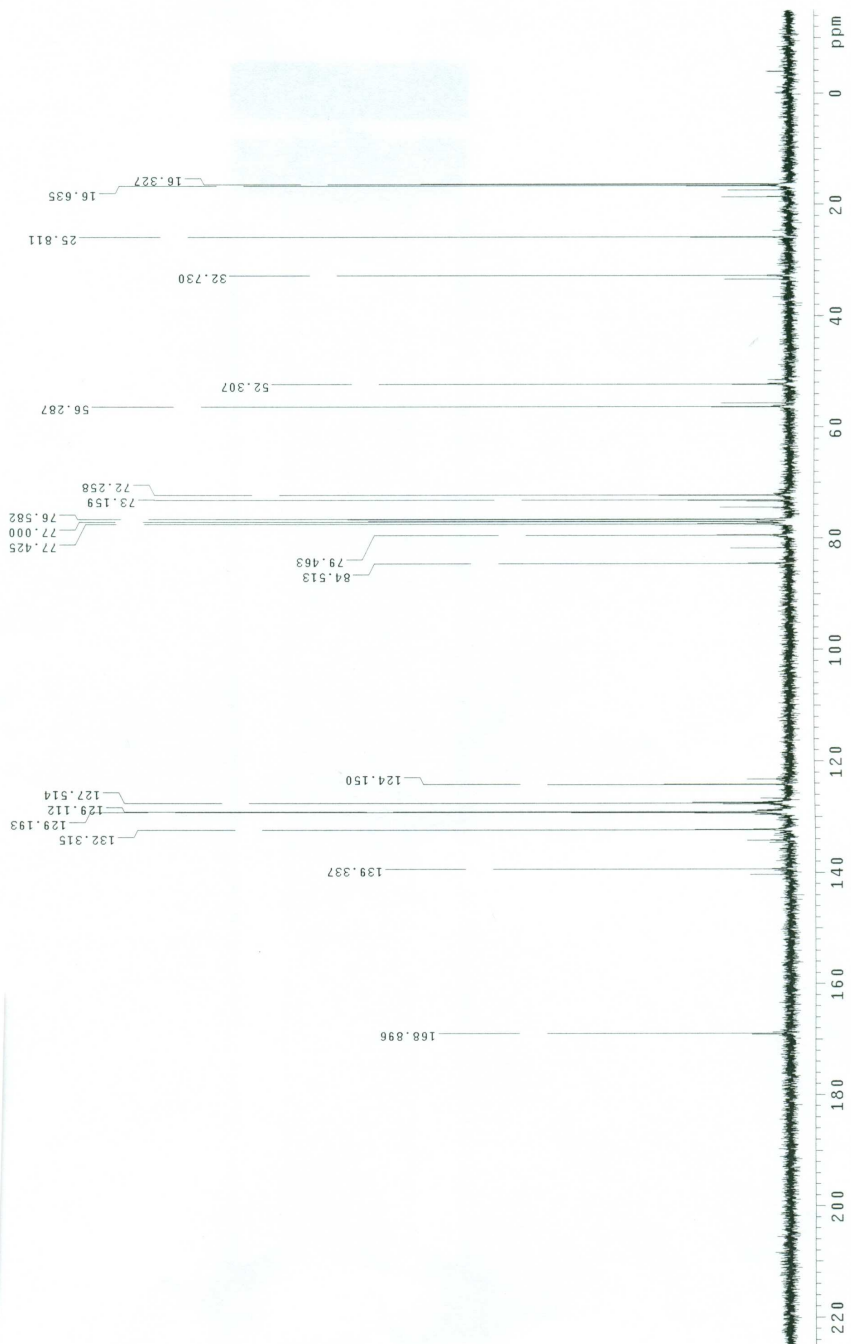

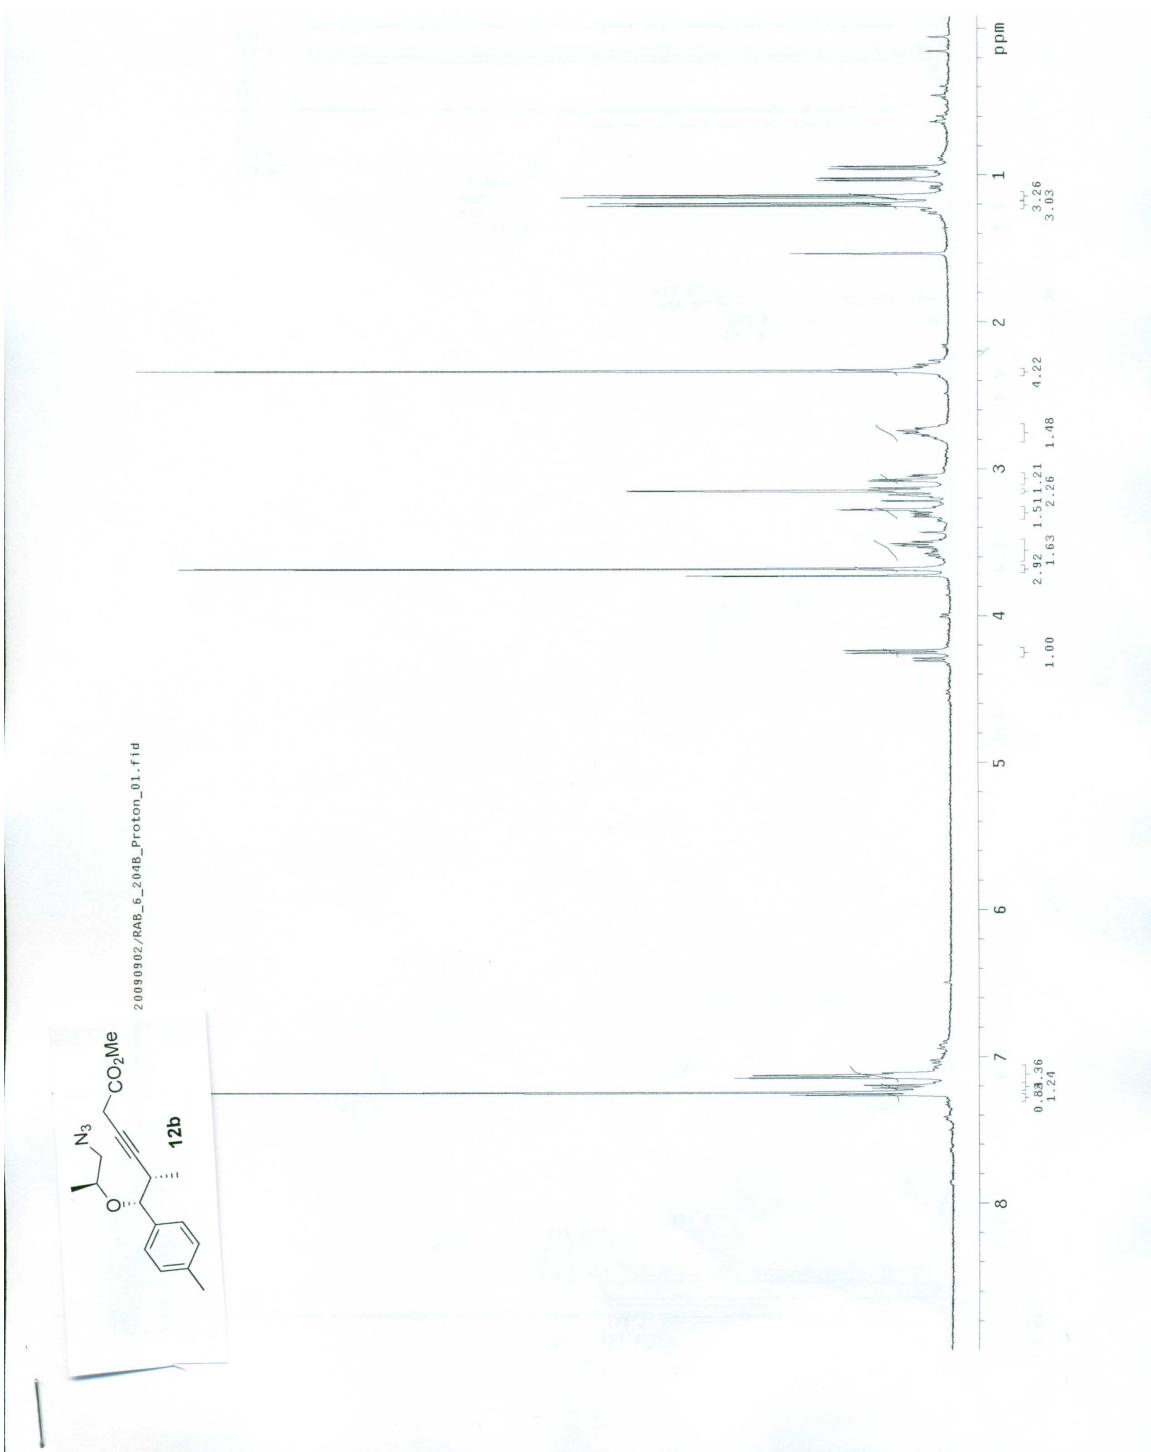

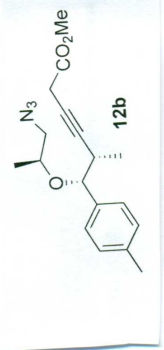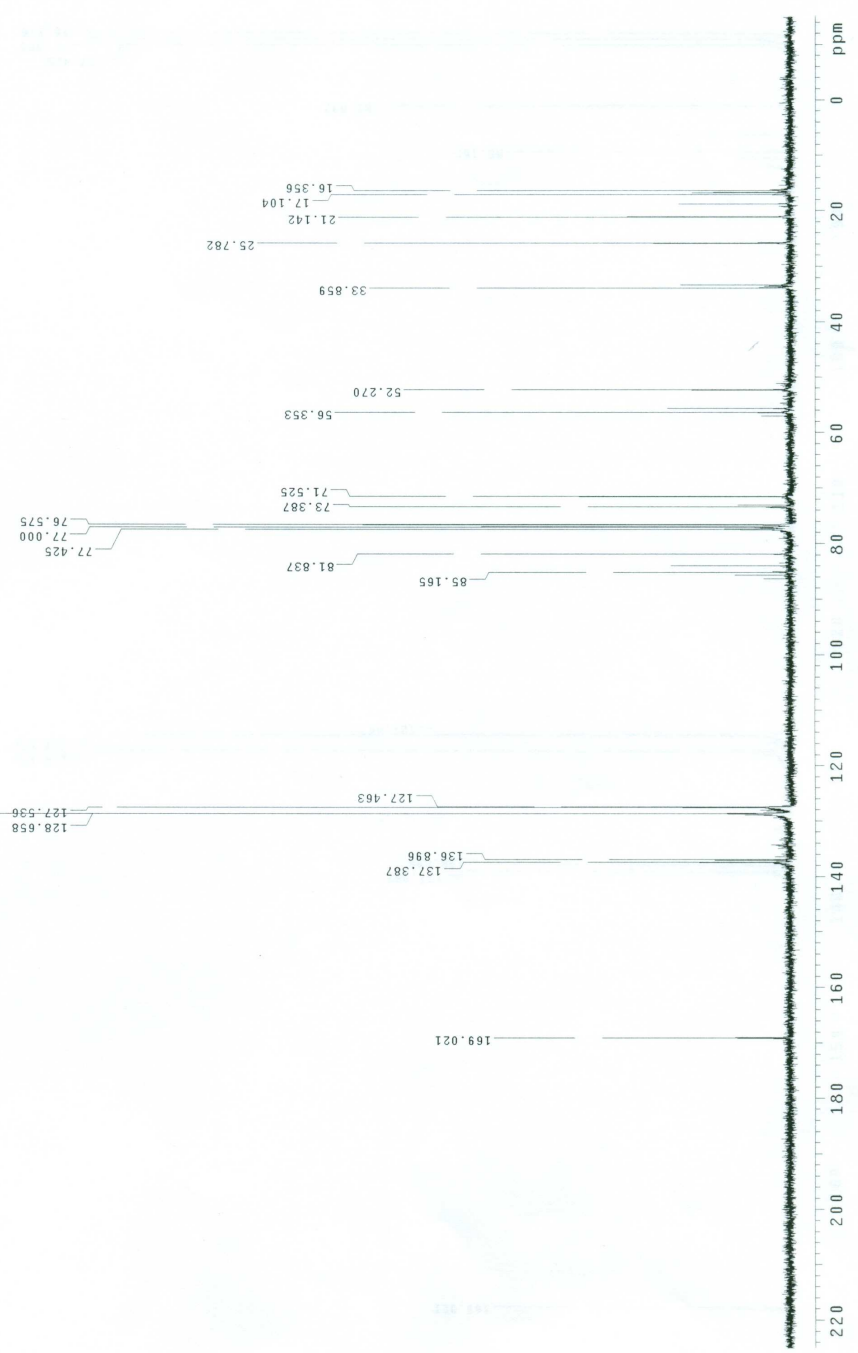

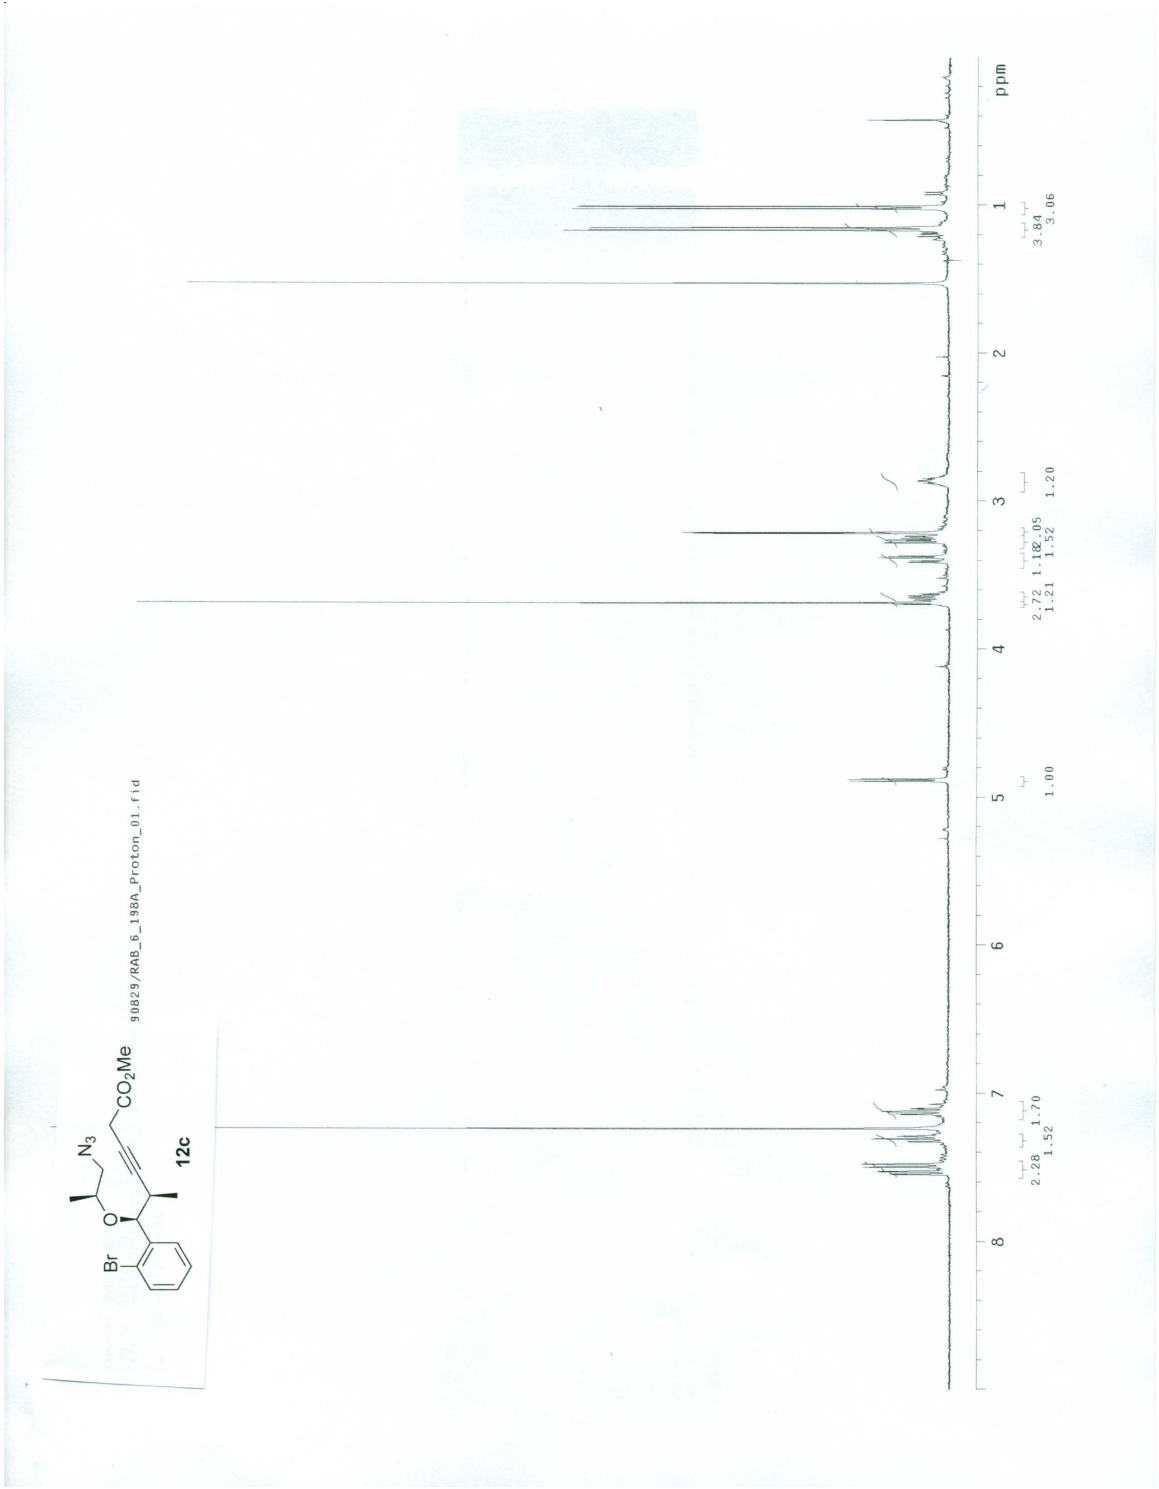

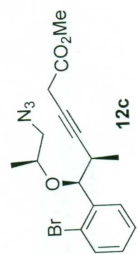

090829/RAB\_6\_198A\_Carbon\_01.fid

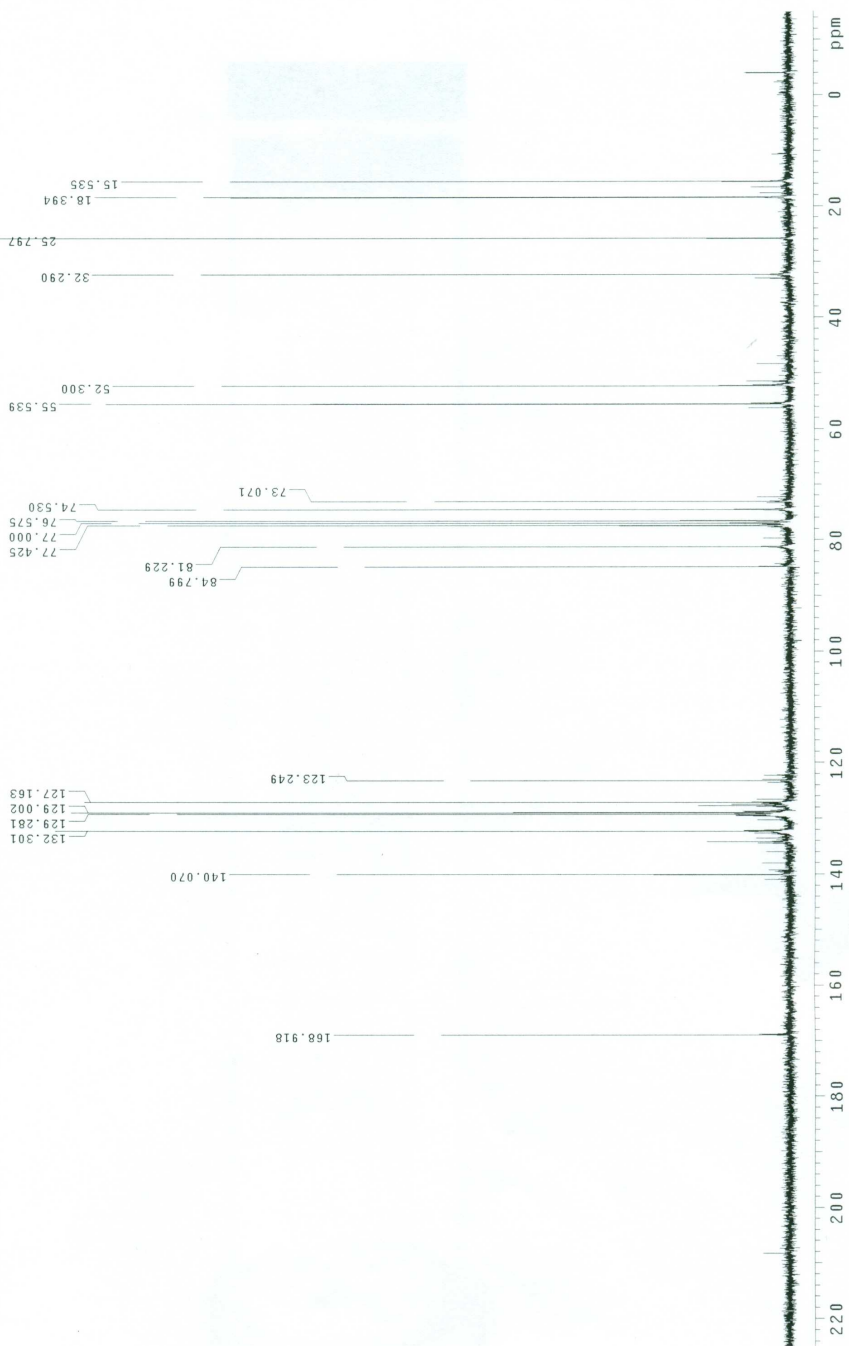

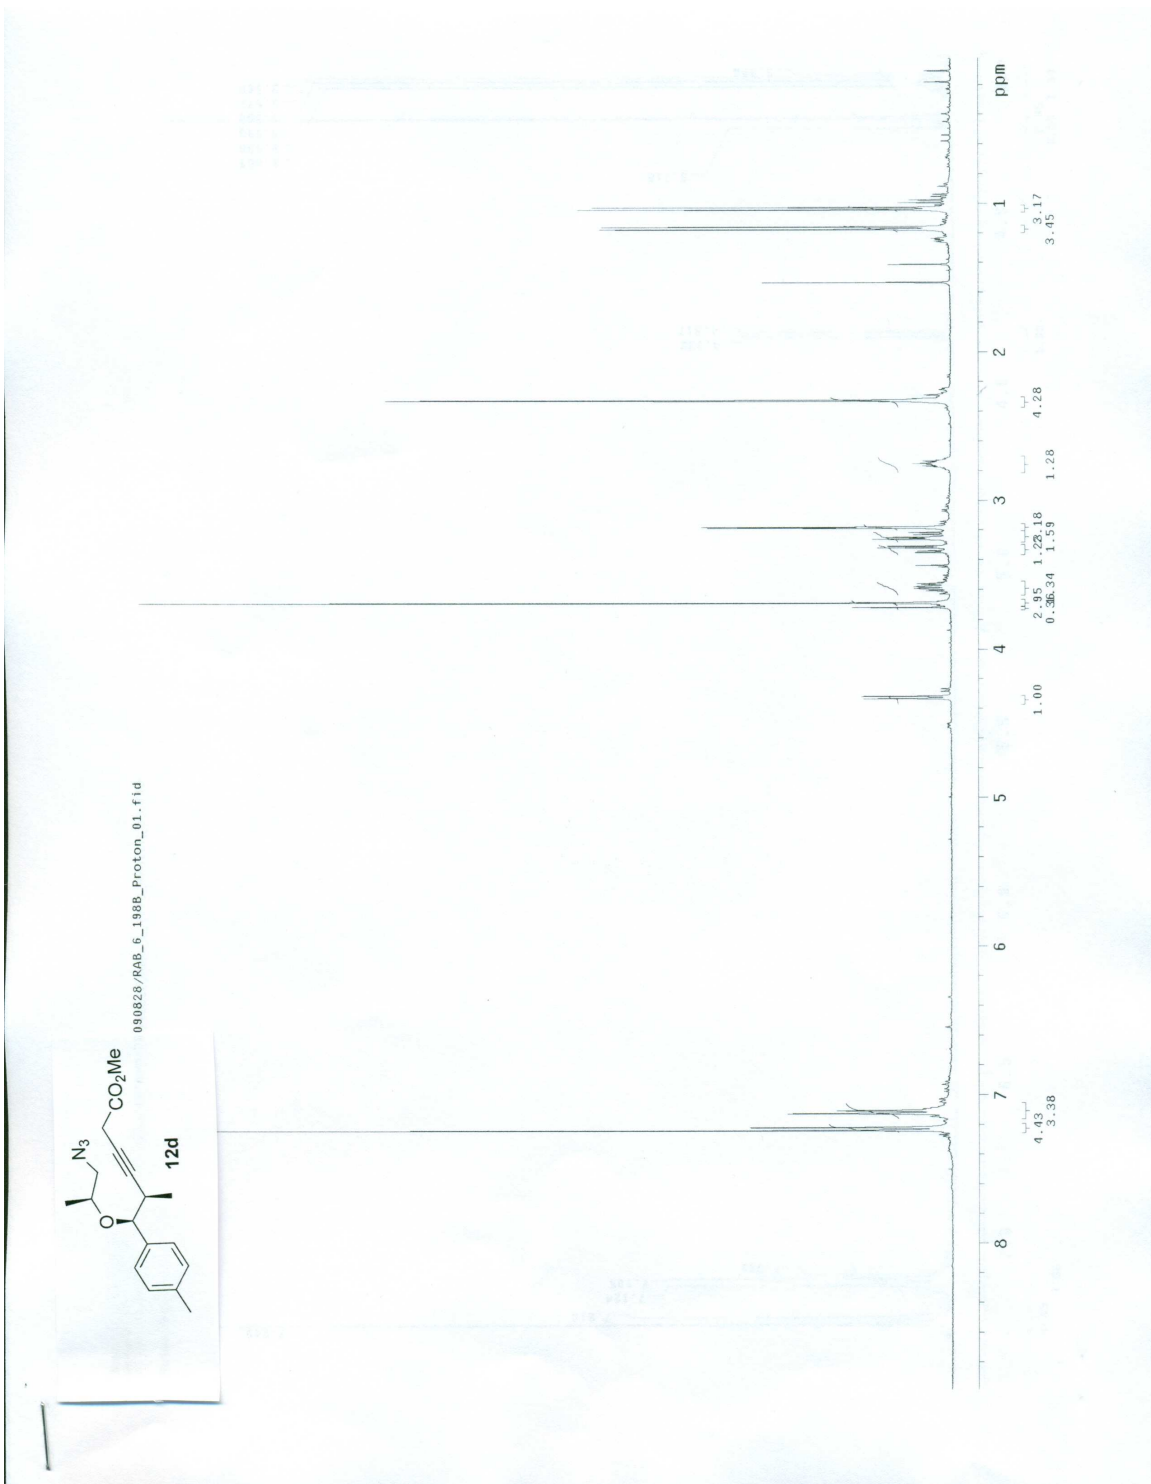



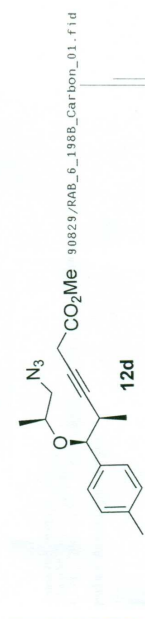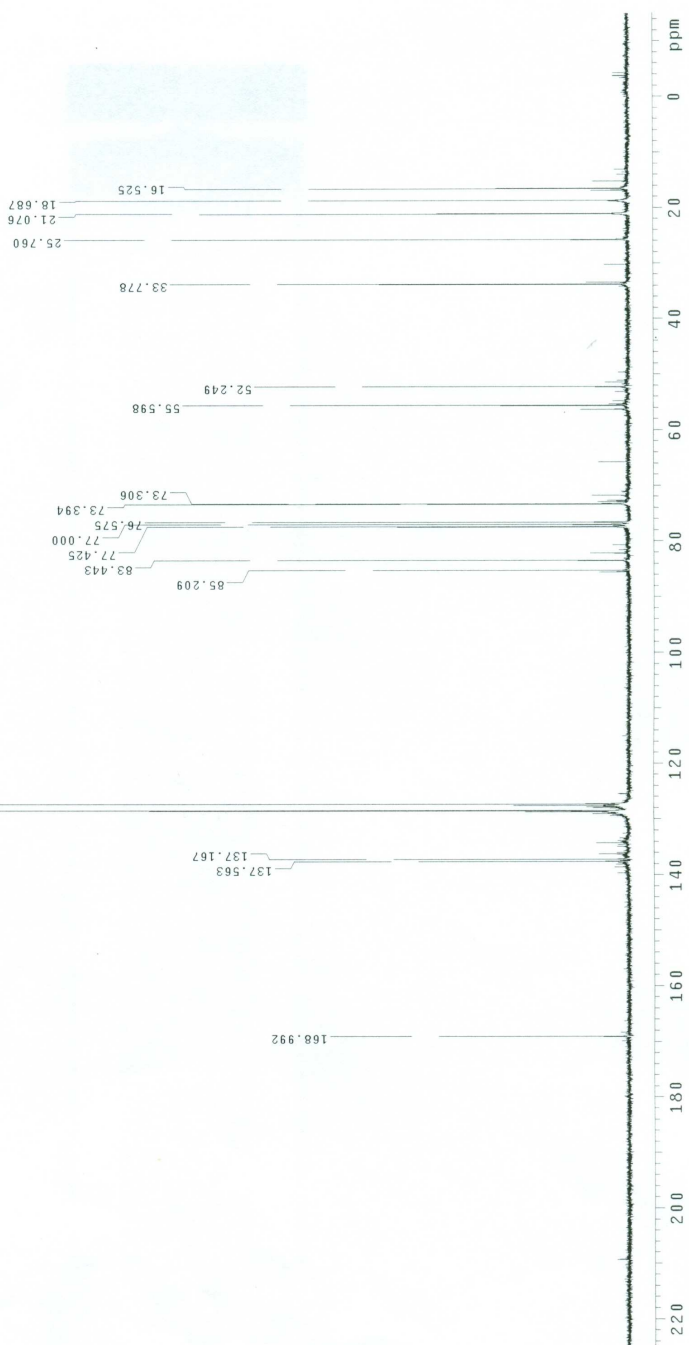

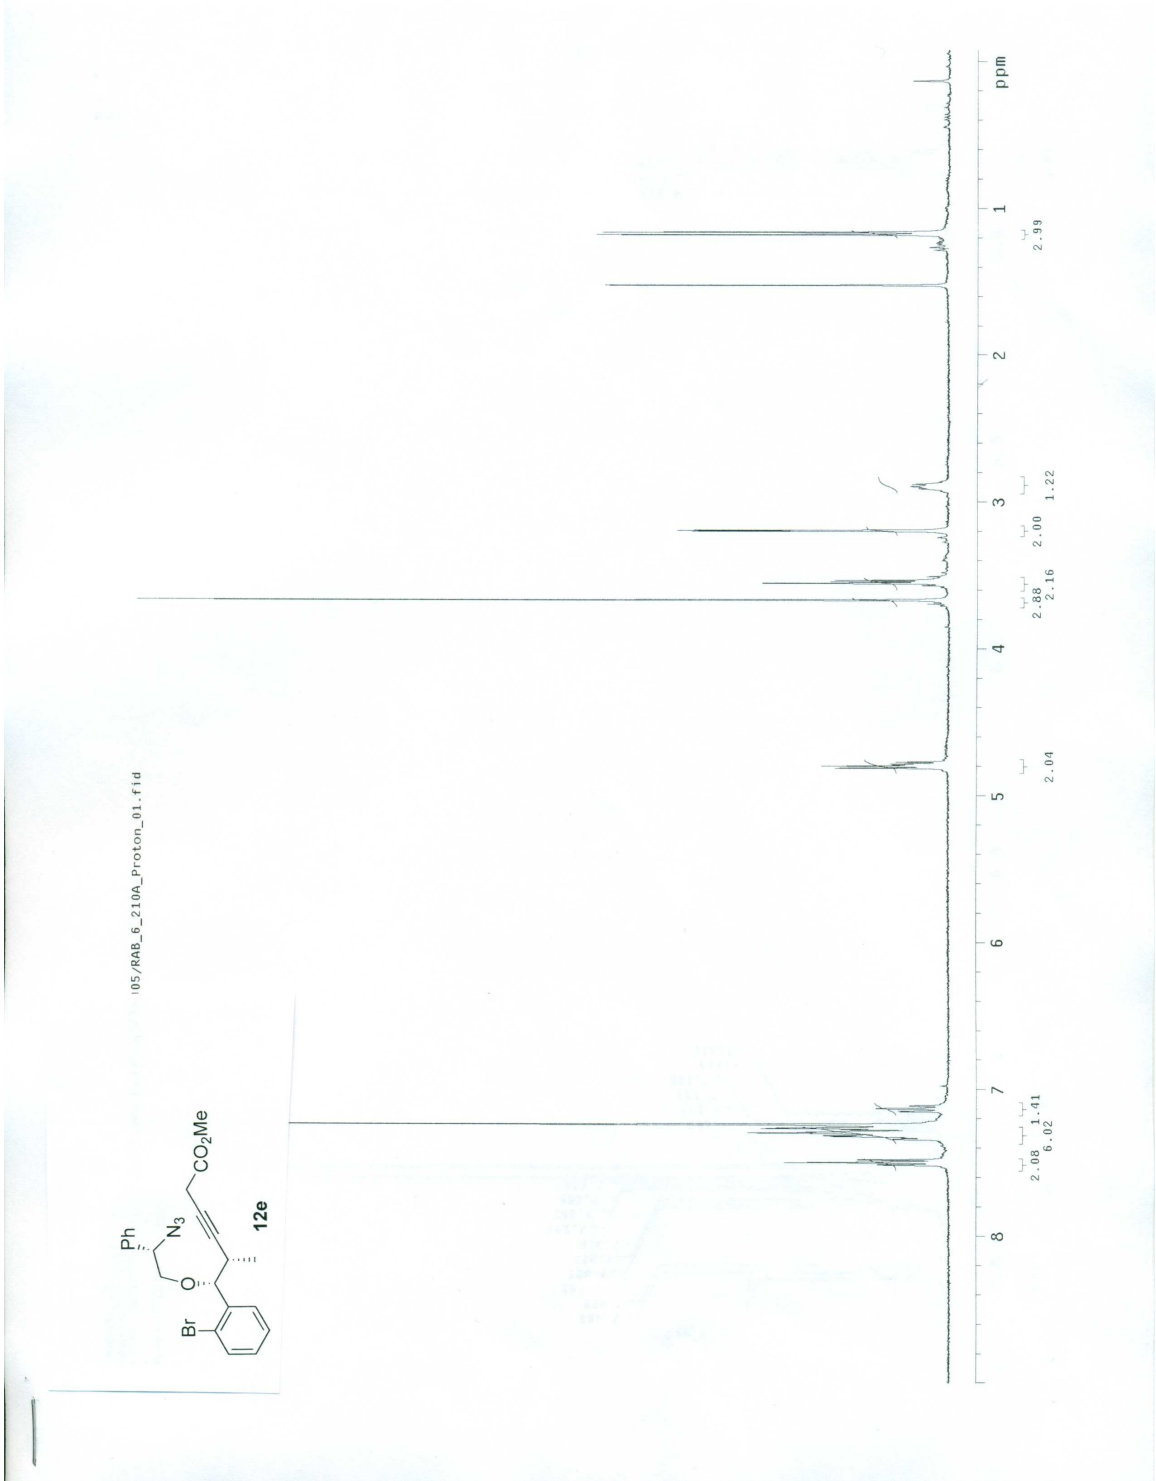

108/RAE\_6\_210A\_Carbon\_01.fid

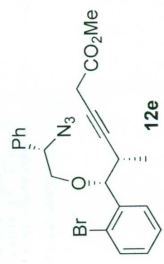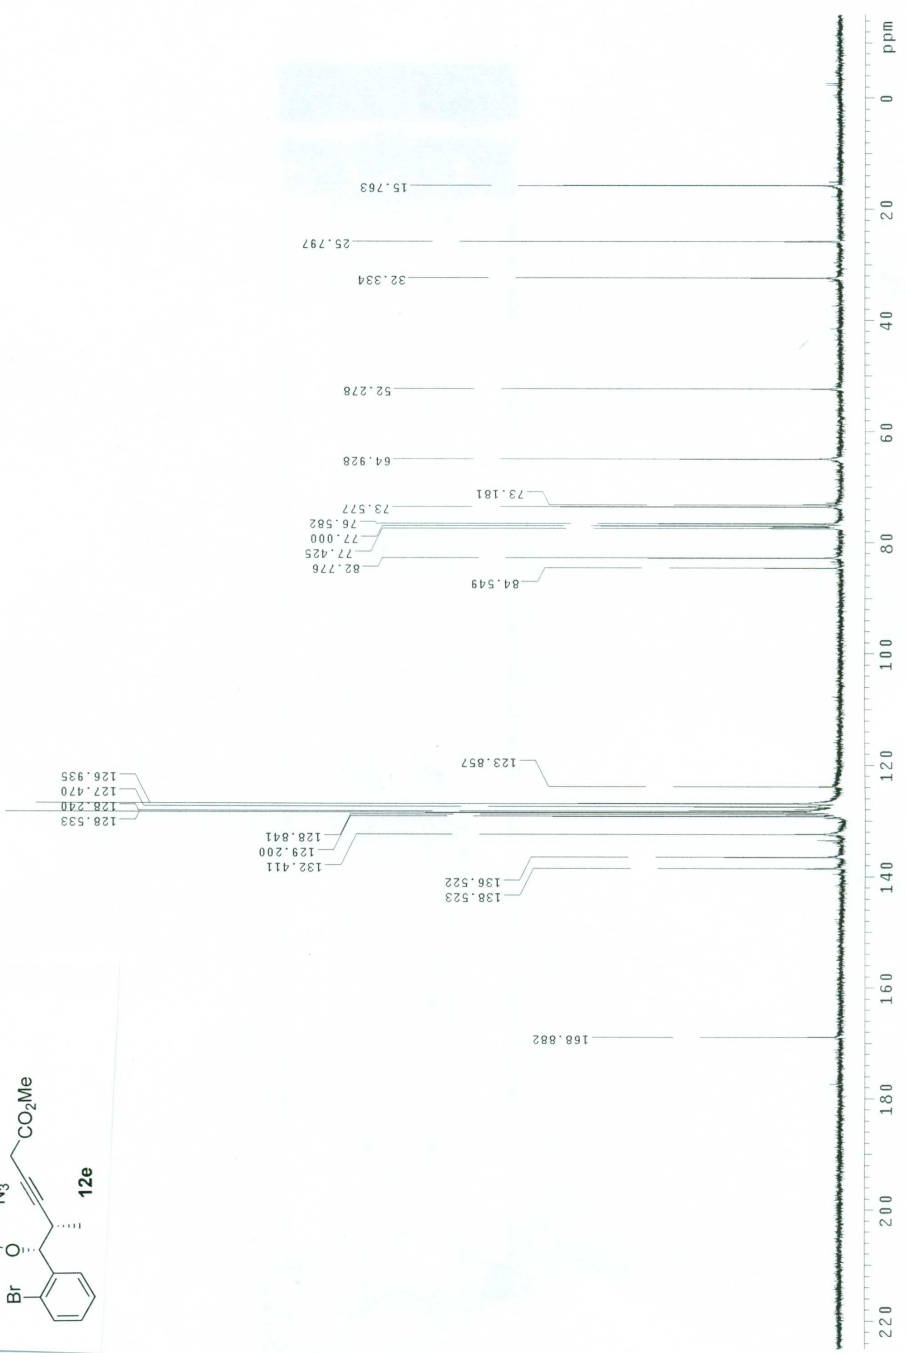

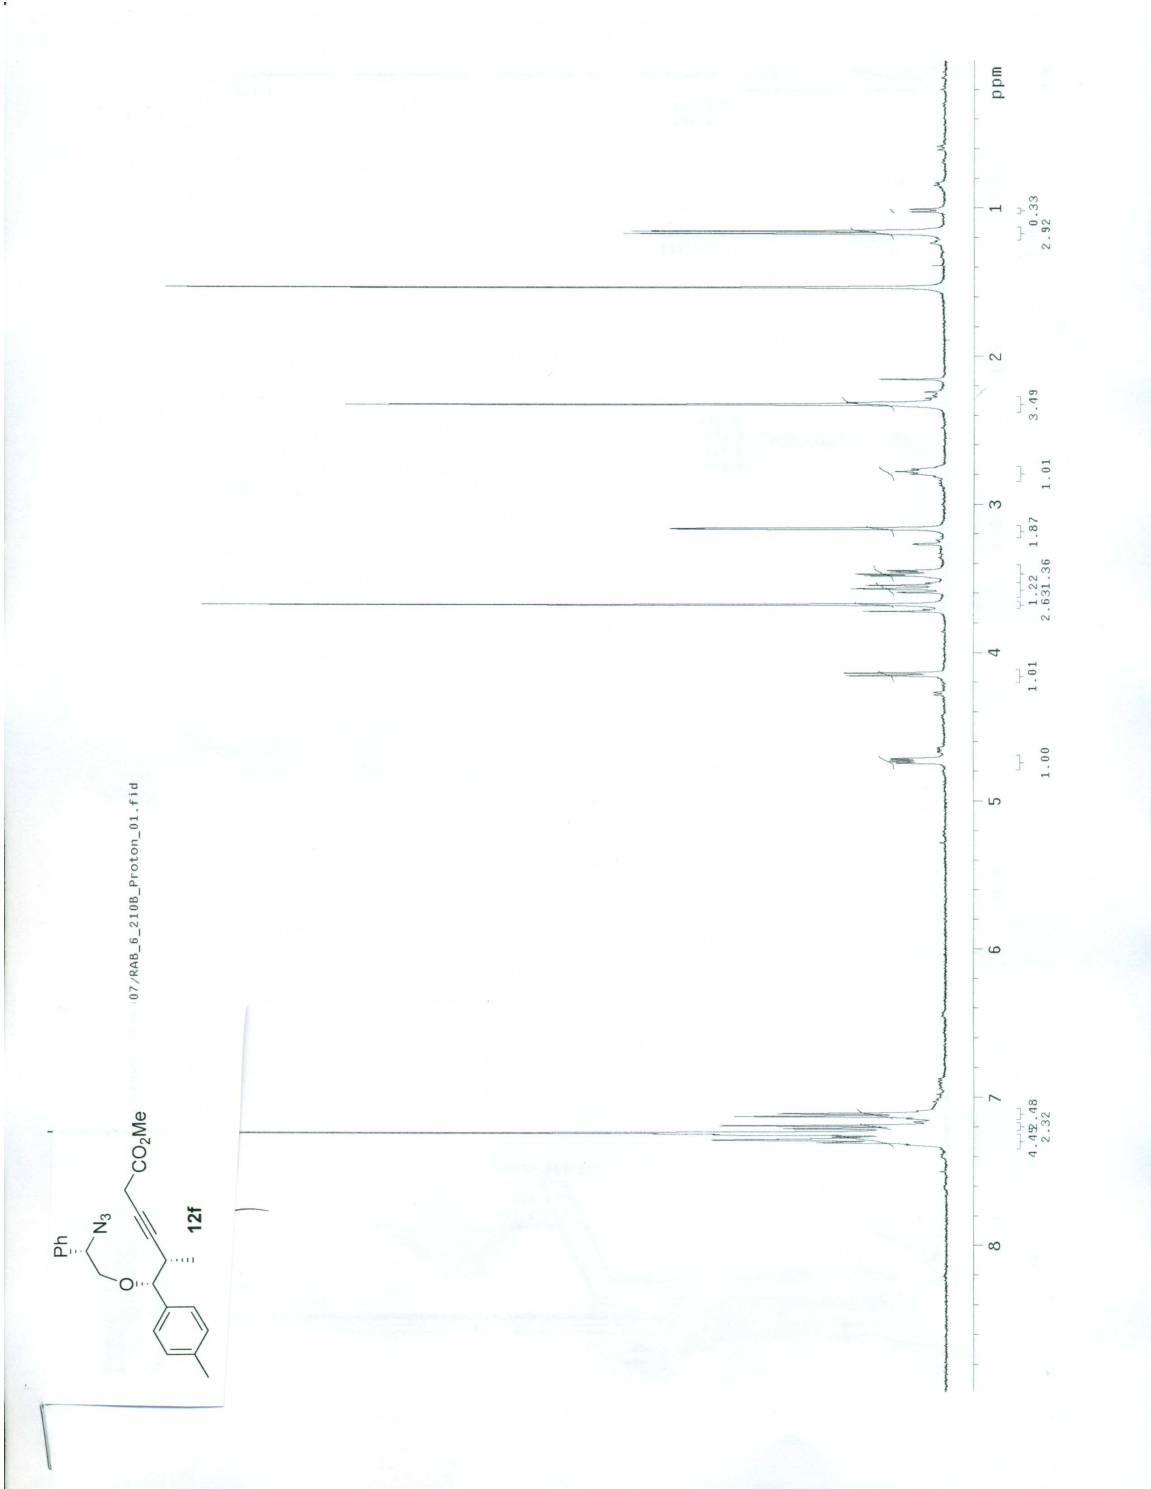

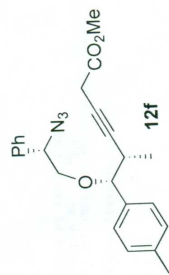

08/RAB\_6\_2108\_Carbon\_01.fid

128.672  
128.504  
128.203  
127.390  
127.361  
126.987

137.402  
136.742  
136.222

168.984

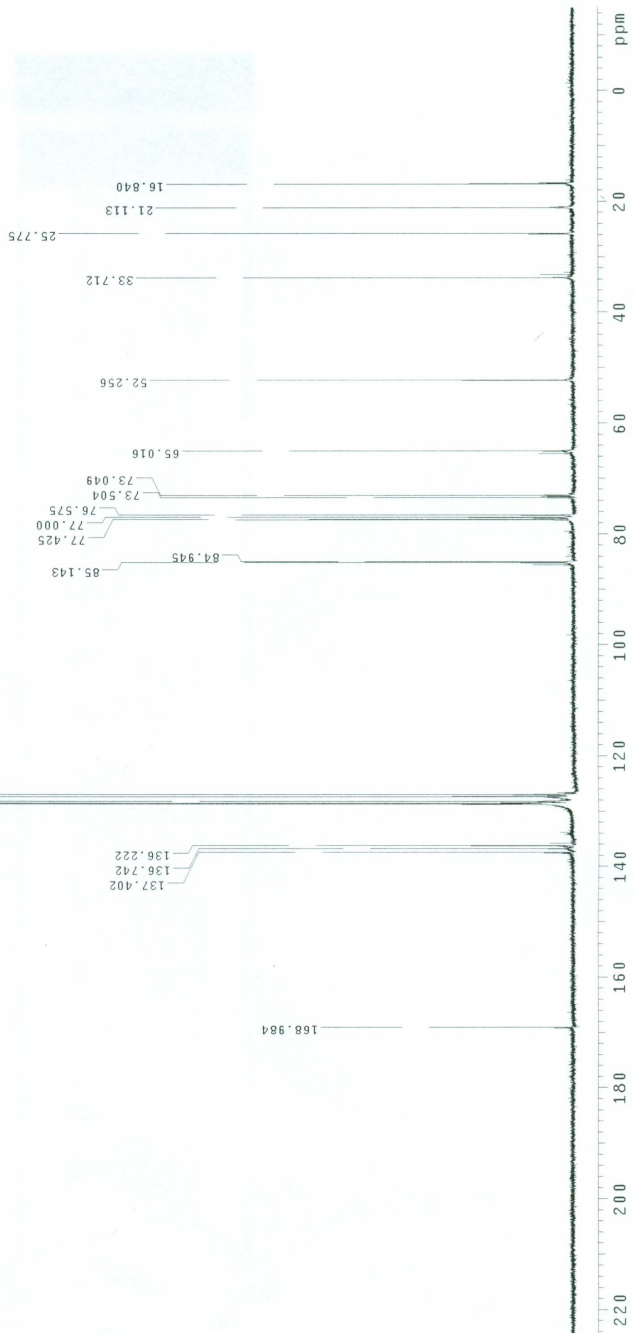

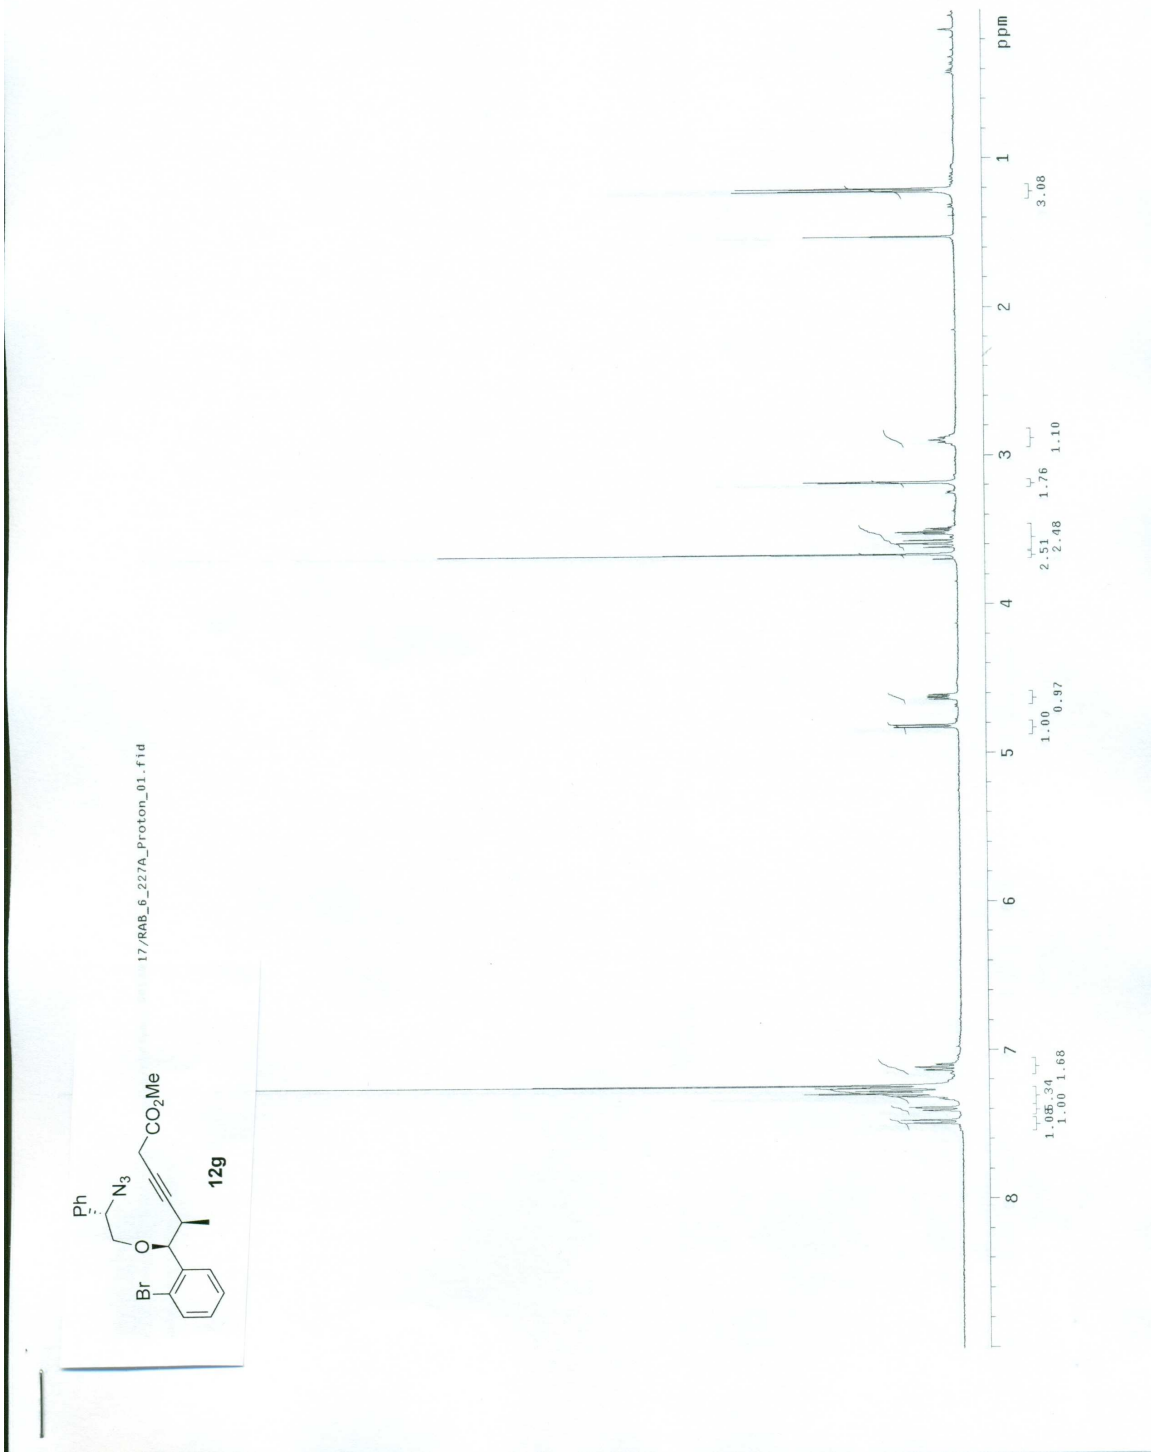

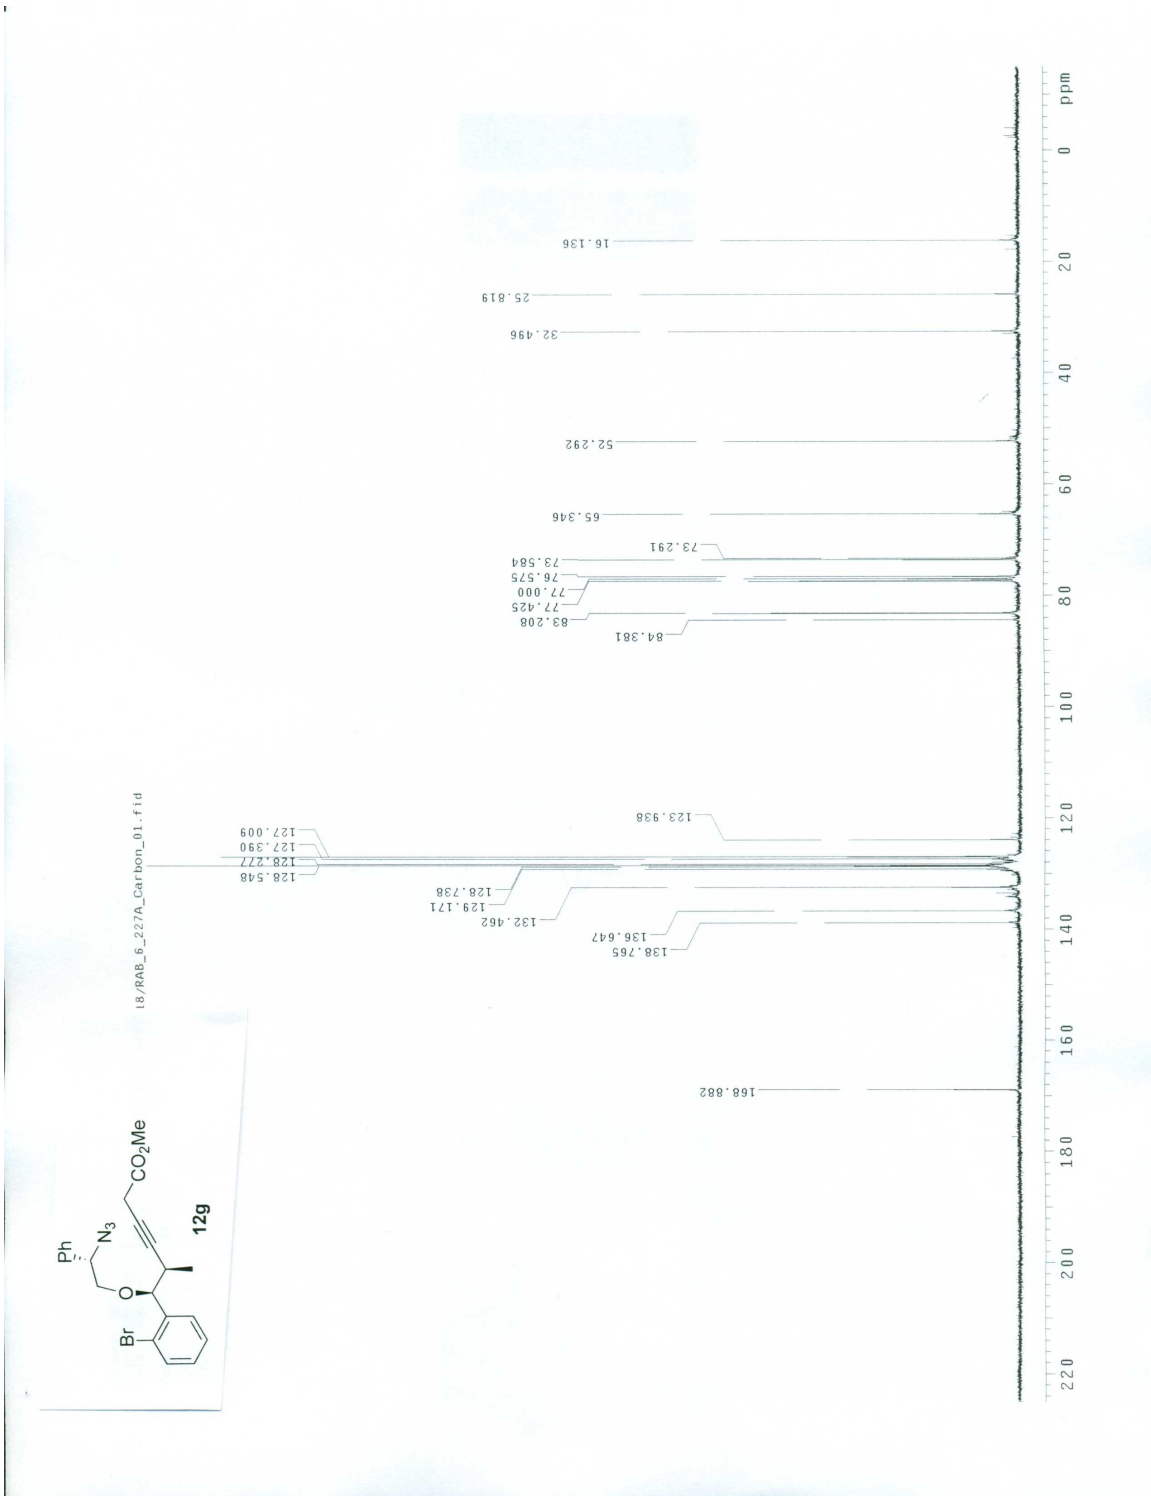

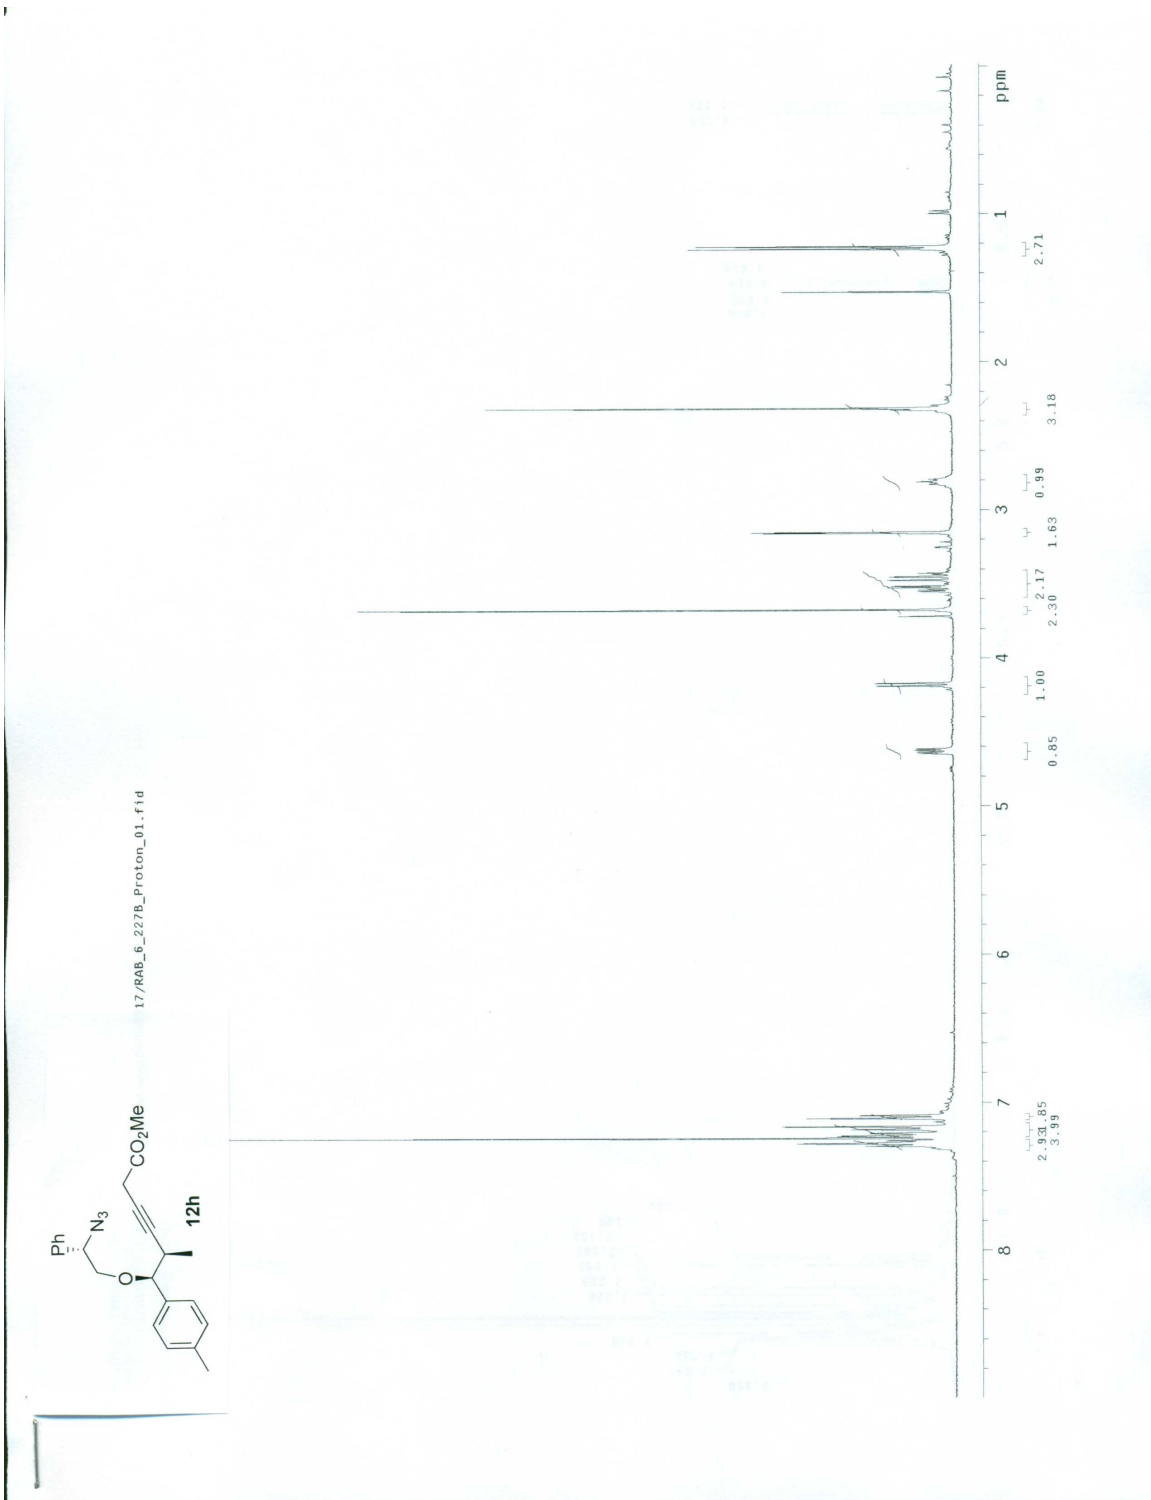



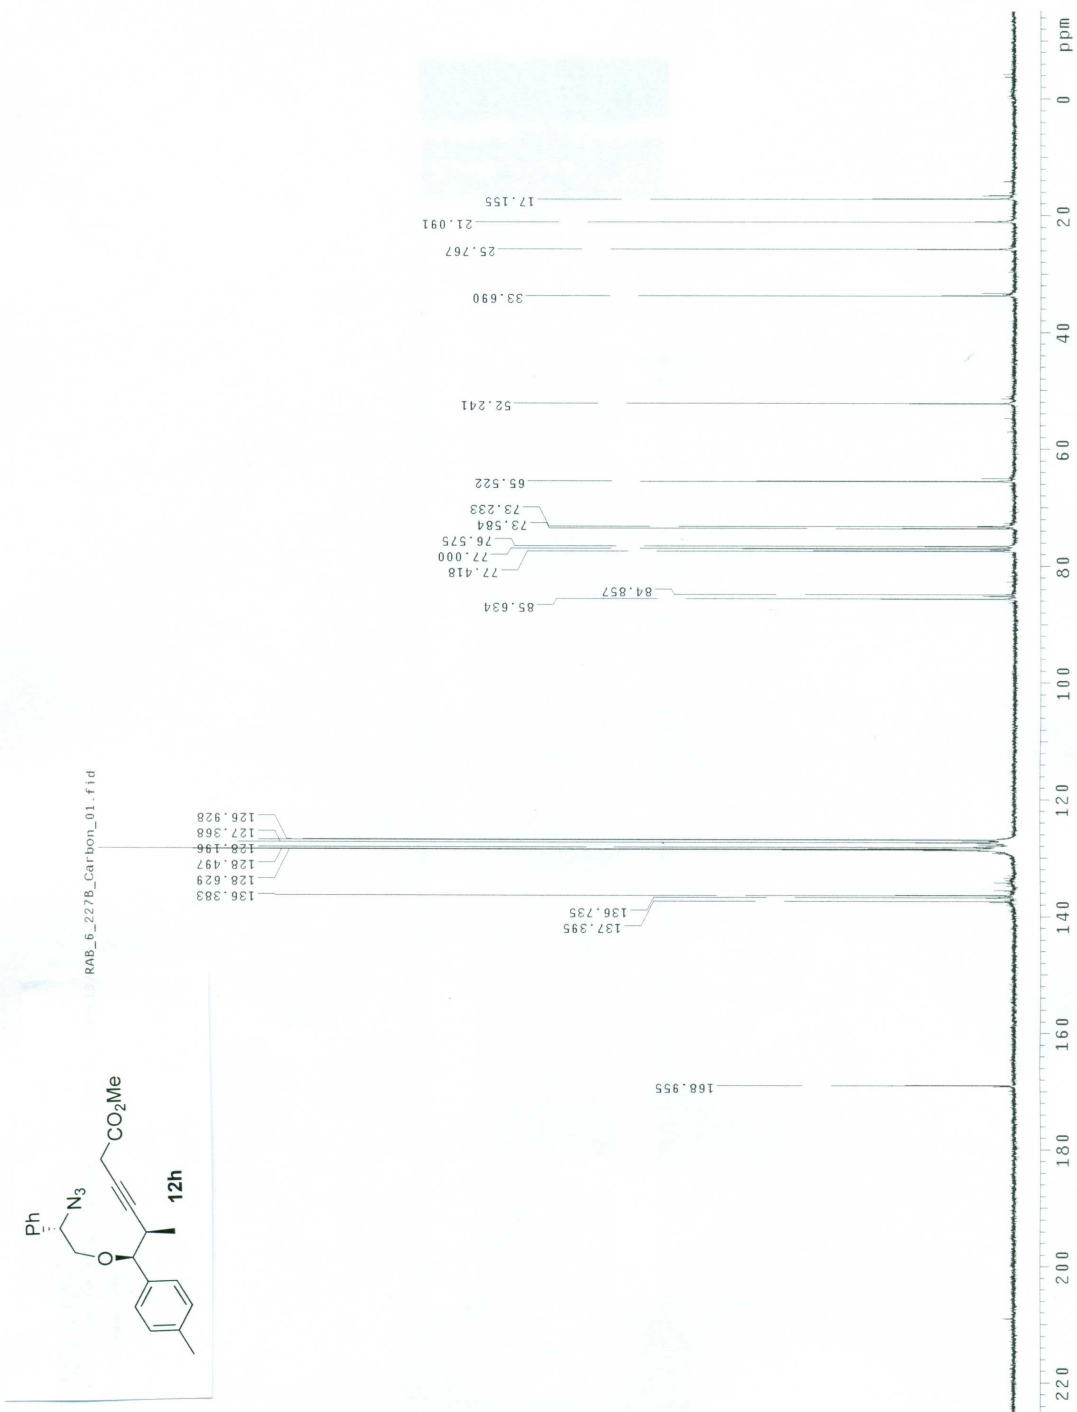

AB\_6\_159aC\_Proton\_02.f1d

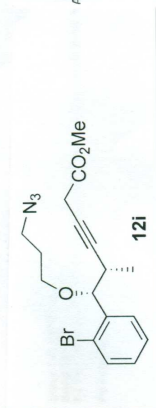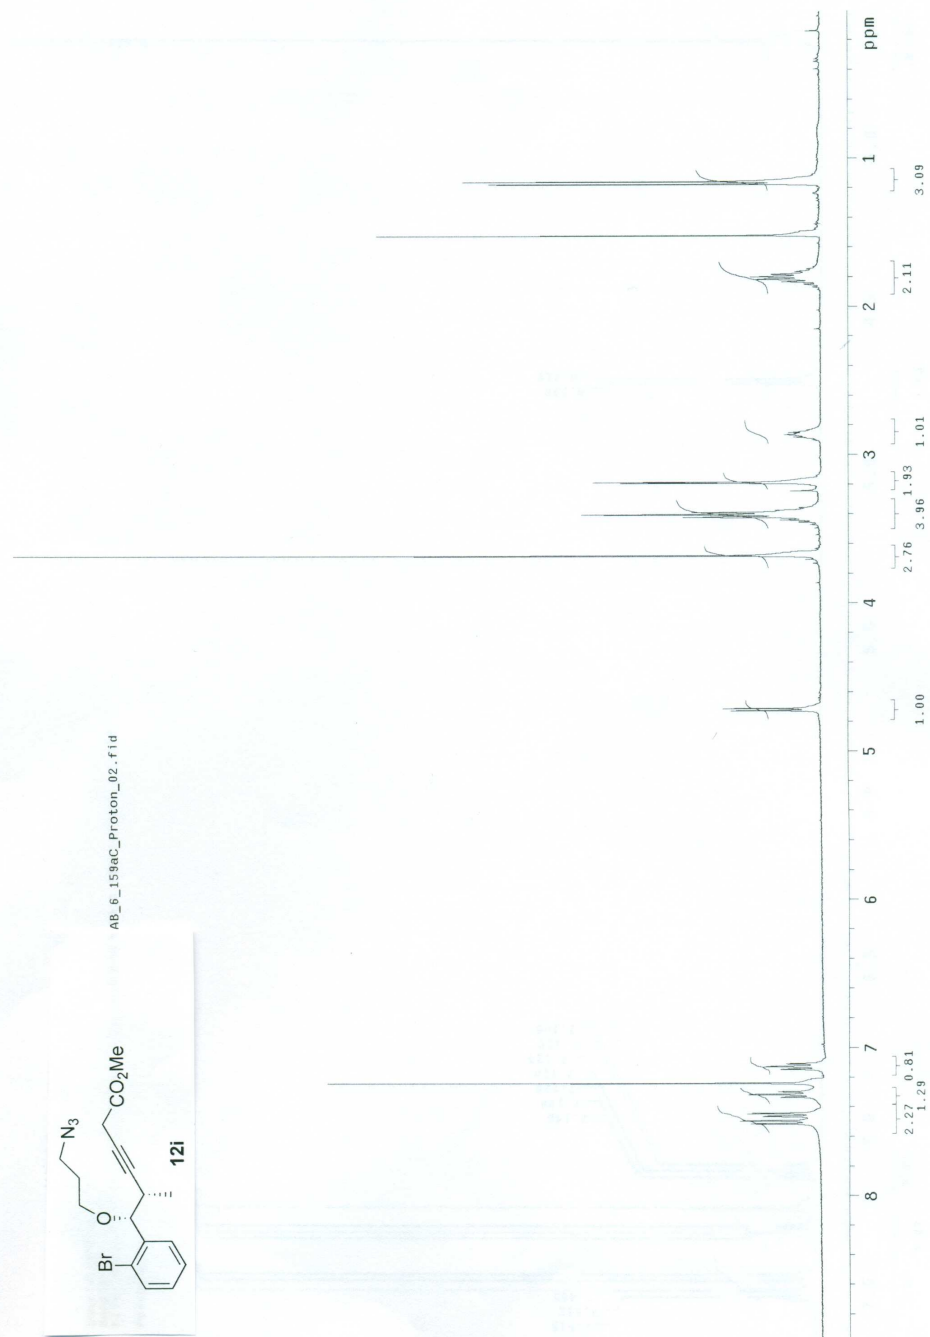

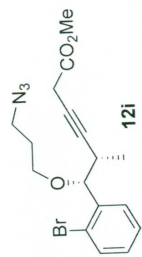

108/RAB\_6\_159aC\_Carbon\_01.F1d

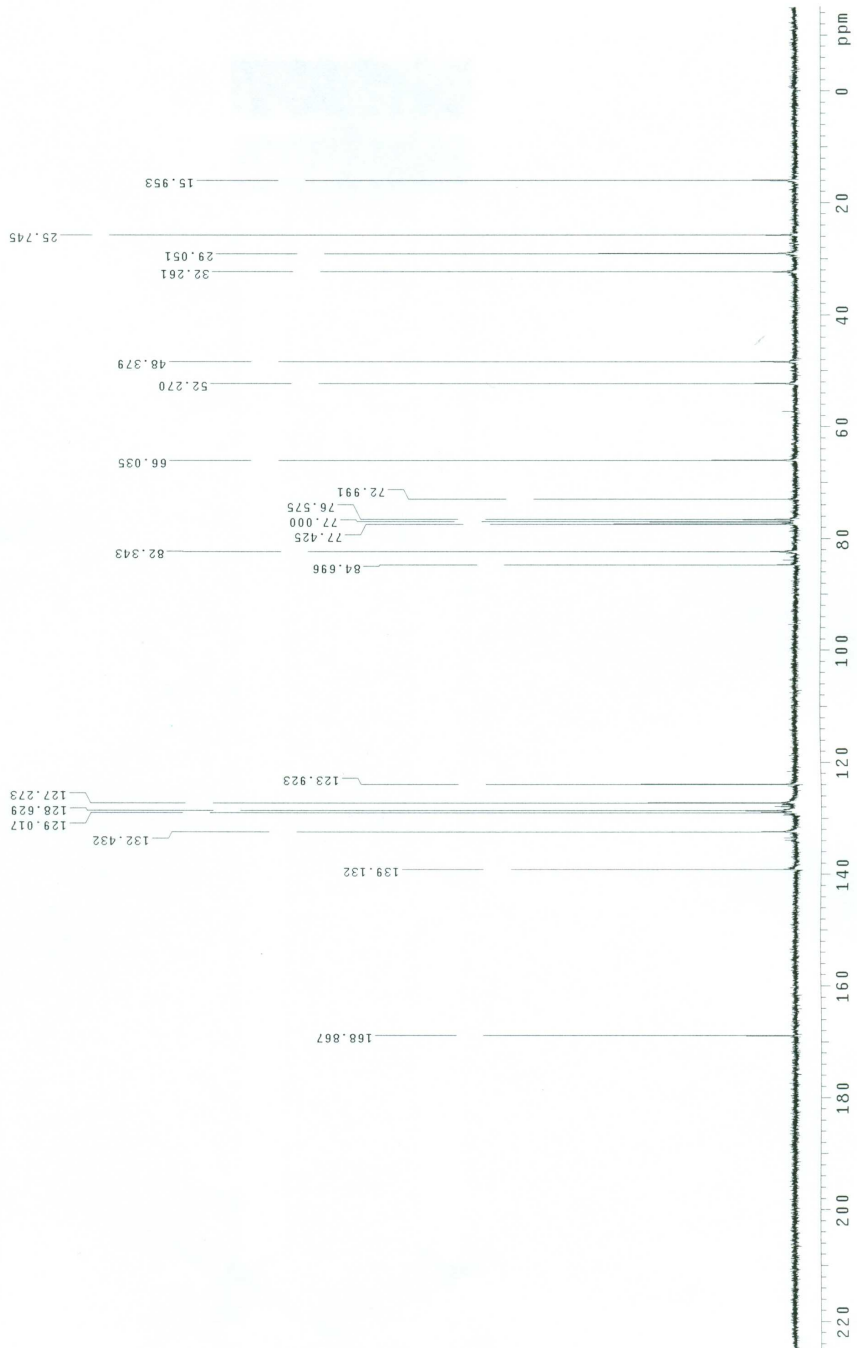

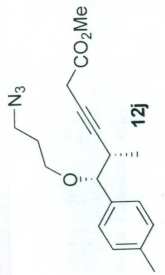

0/R08\_6\_1718\_Proton\_01.fid

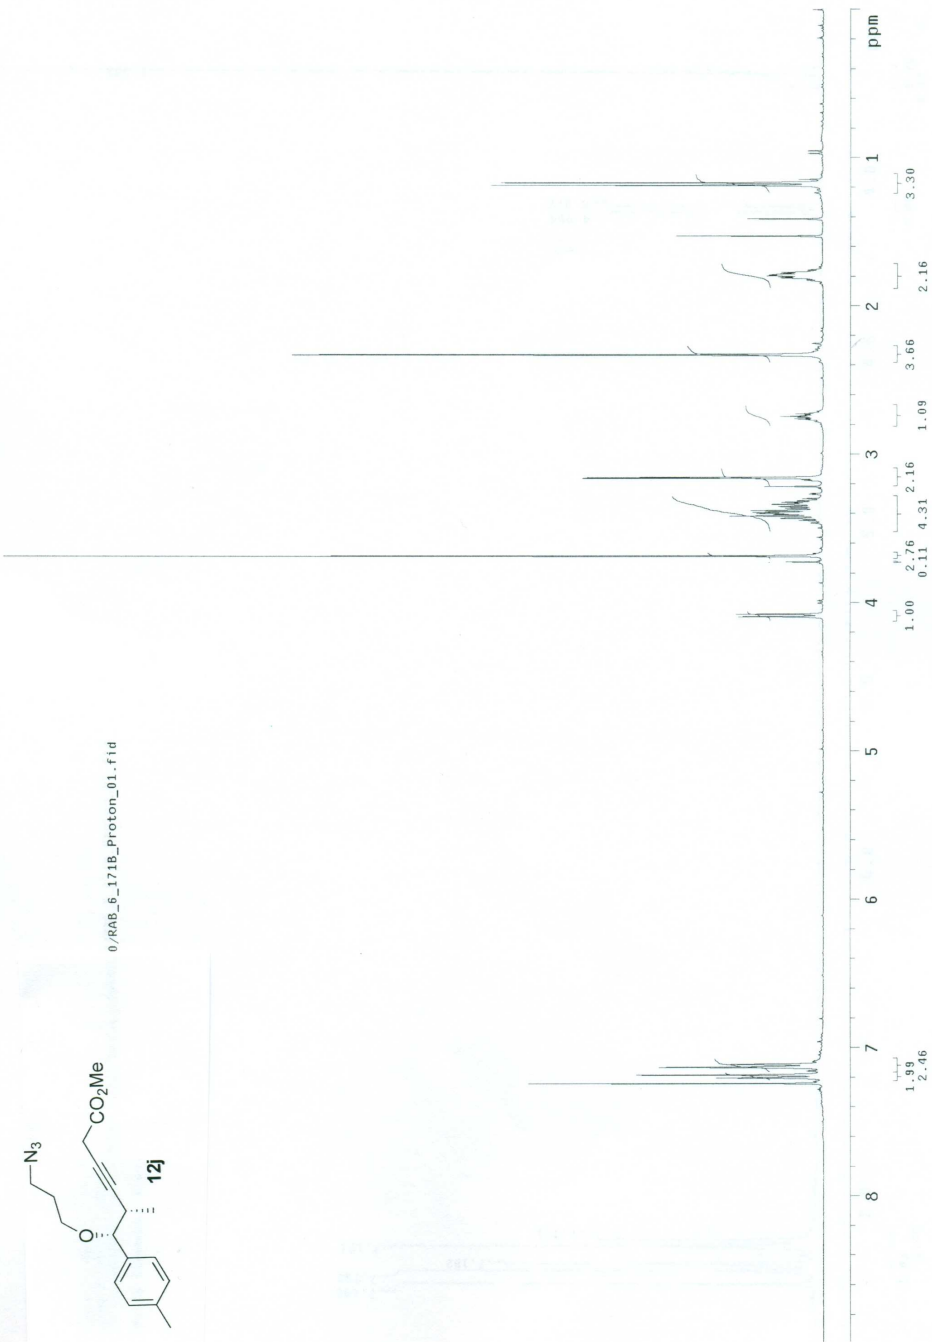

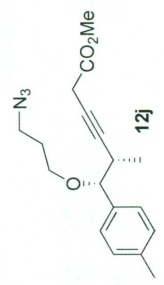

RAB\_6\_171E\_Carbon\_01.f1d

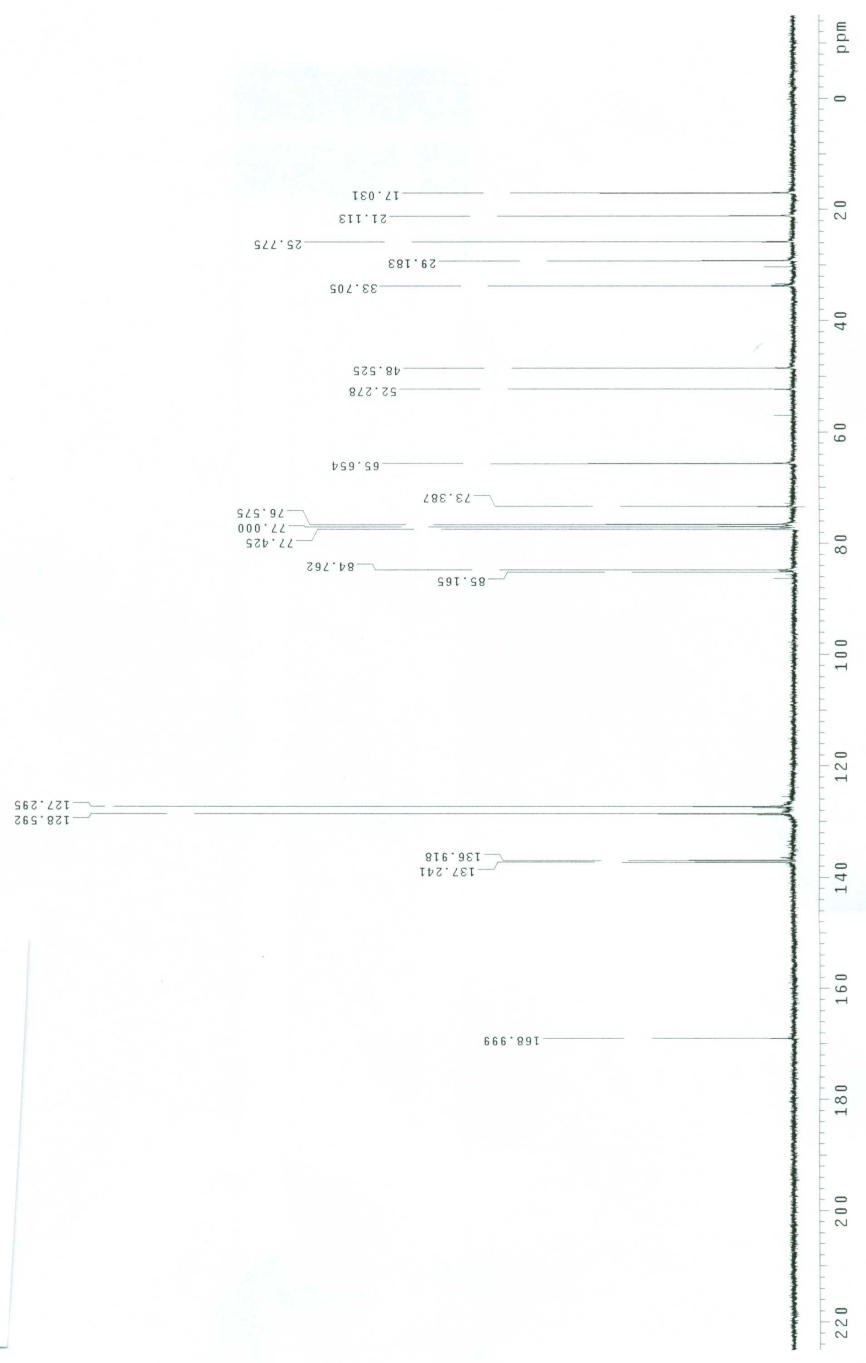

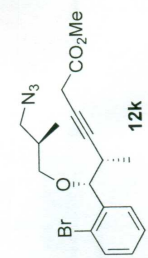

18\_6\_277A\_Proton\_02.fid

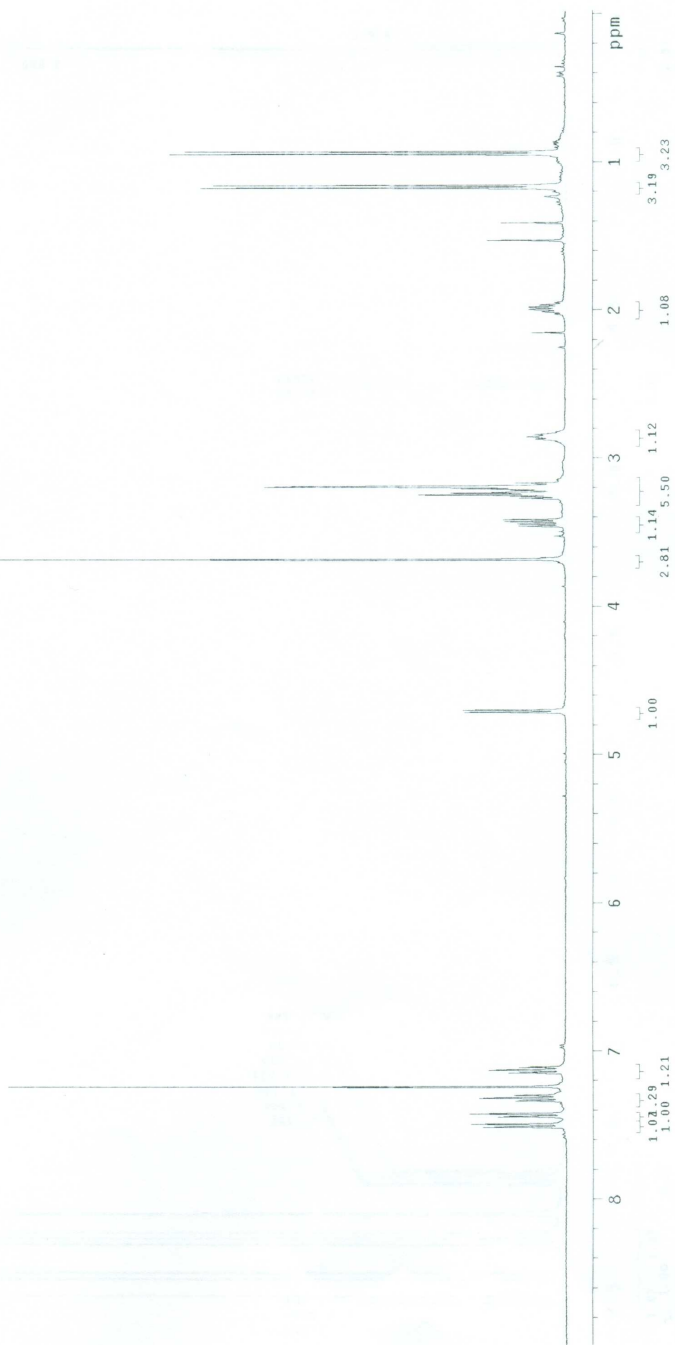

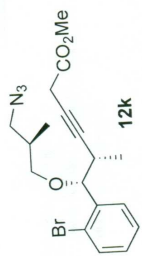

/RAB\_6\_277A\_Carbon\_01.fid

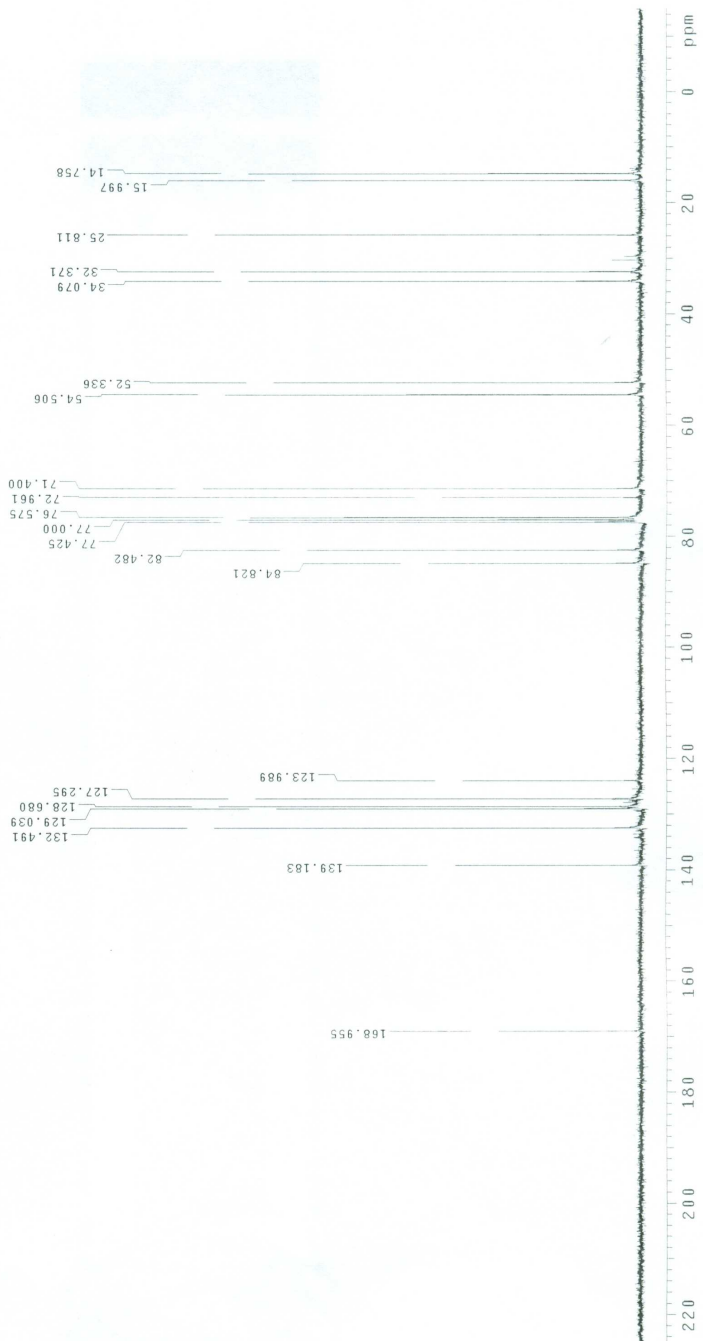

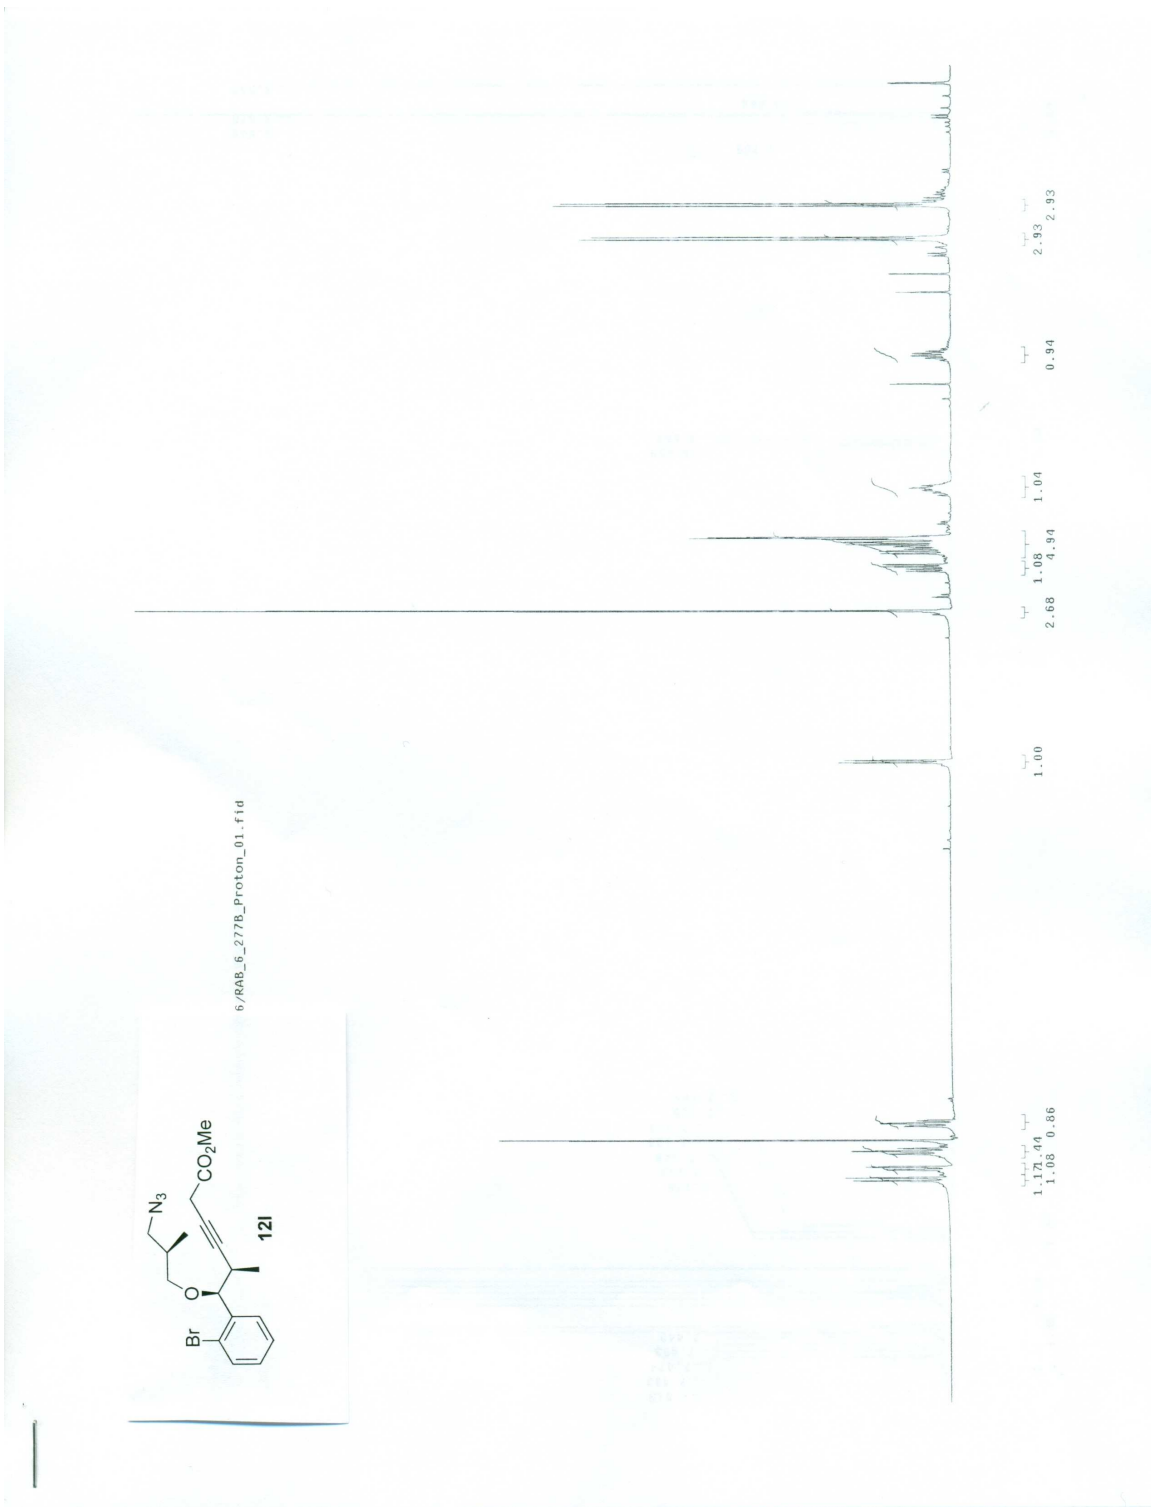



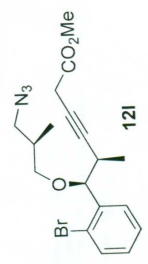

120/RAB\_6\_2778\_Carbon\_01..fid

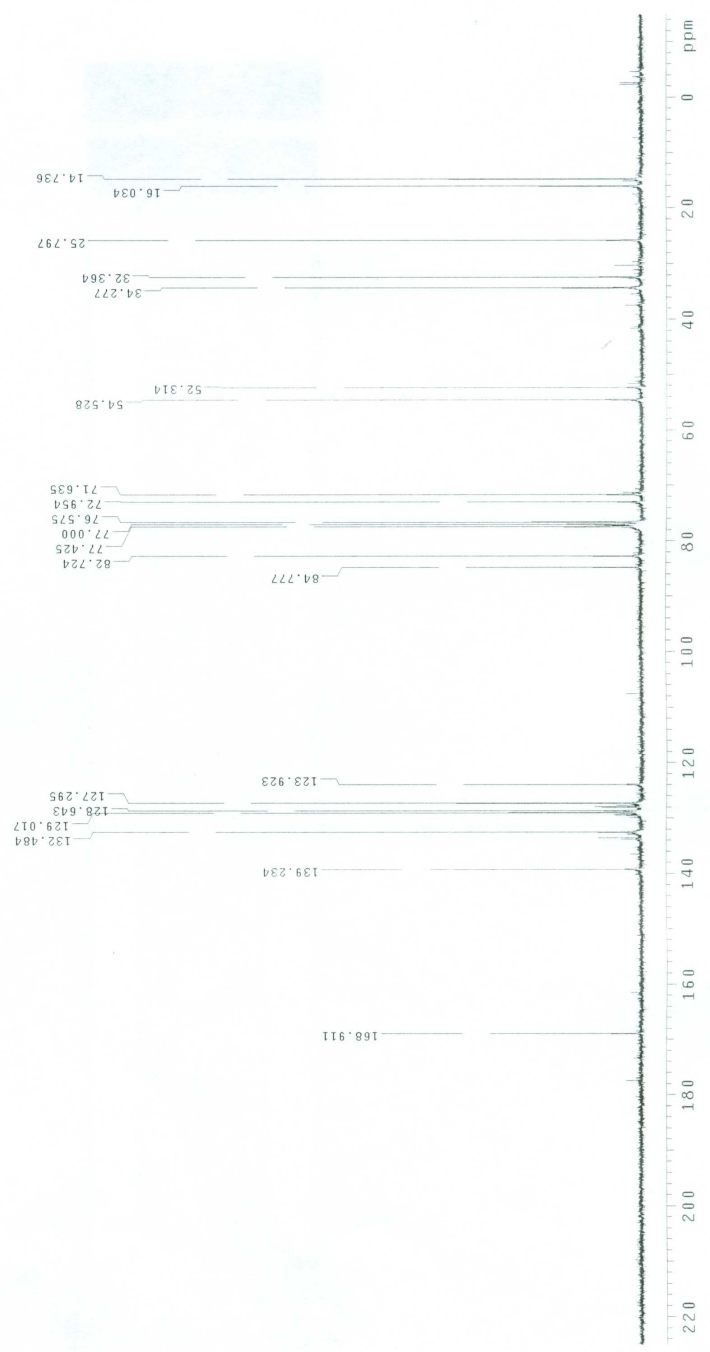

ata:/brawn/20090908/048\_6\_216A\_Proton\_01.fid

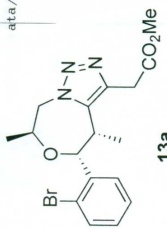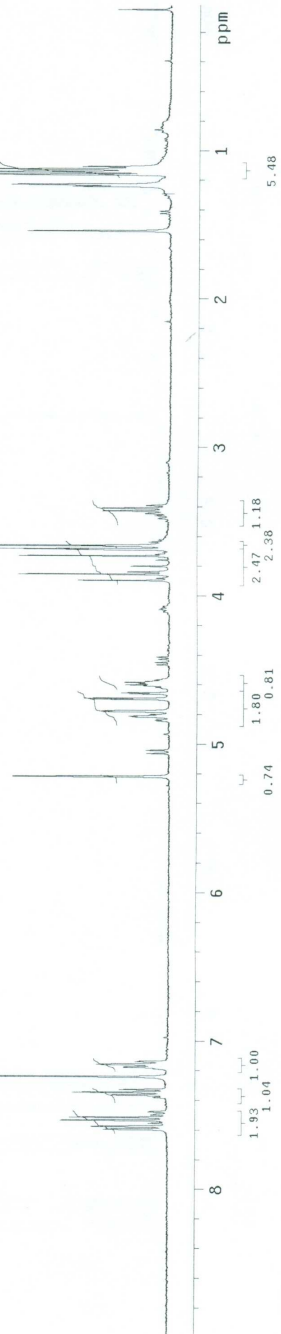

data://rbrawn/20080810/RAB\_6\_216A\_Carbon\_01.fid

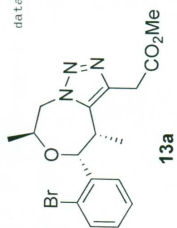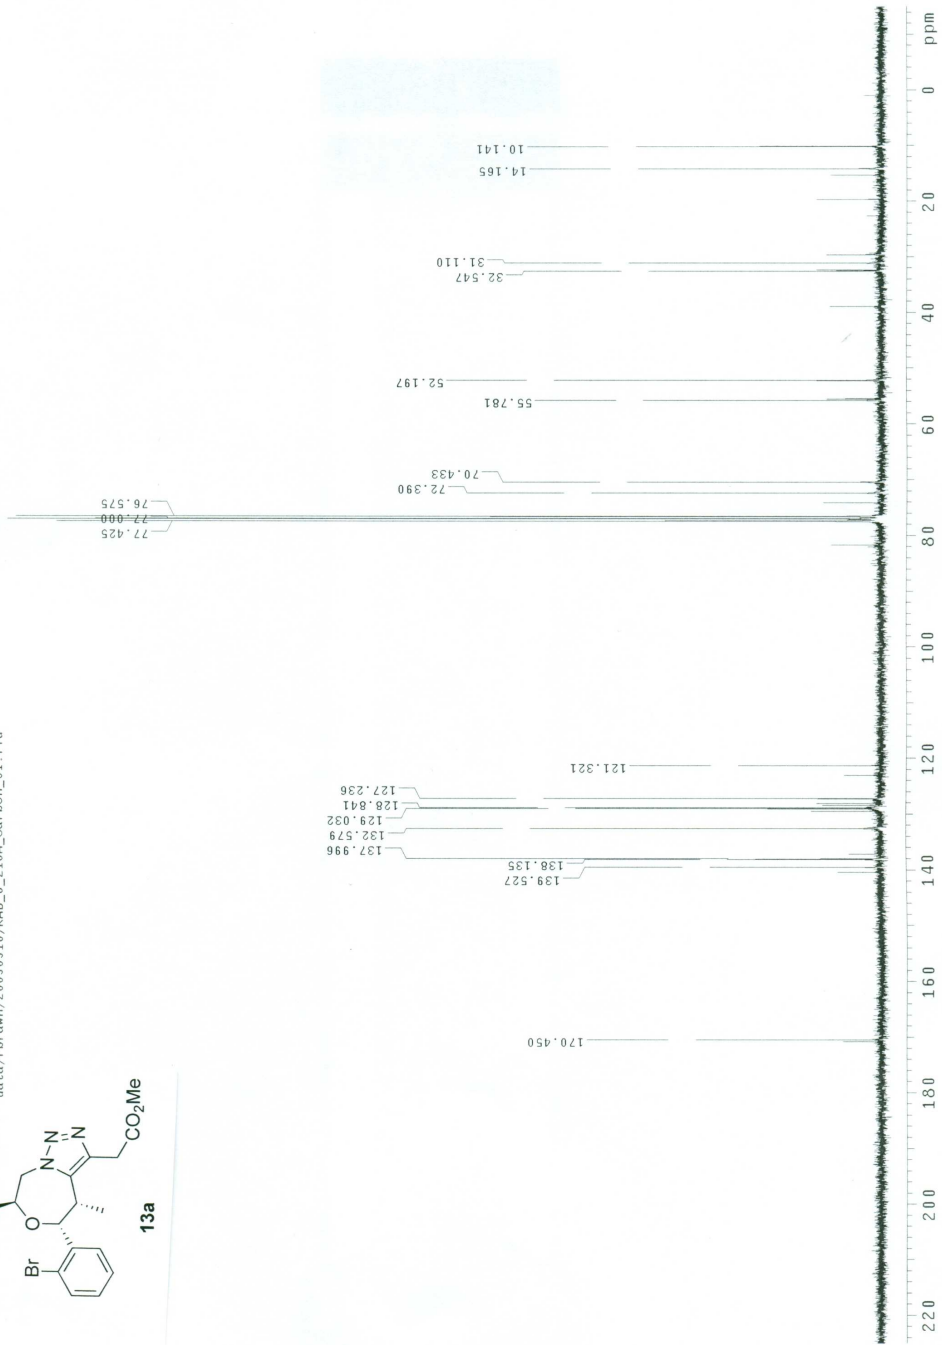

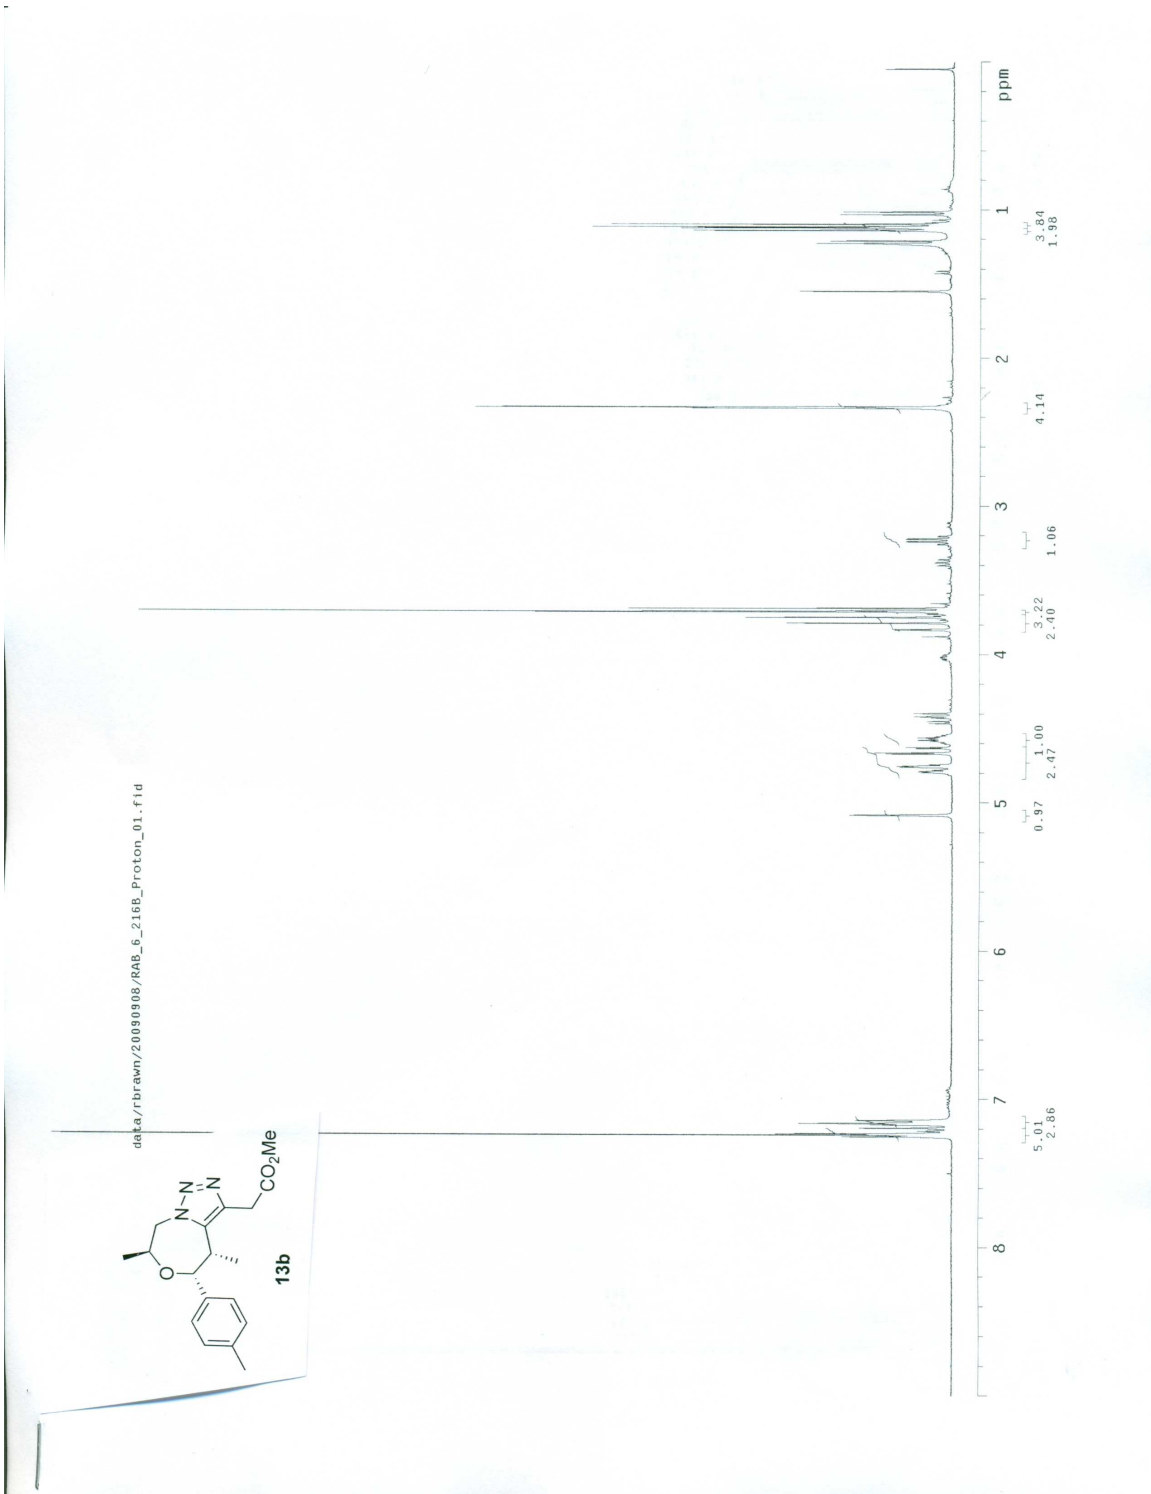

data/rbrawn/20090910/RAB\_6\_216B\_Carbon\_01.fid

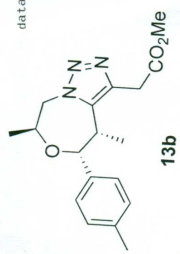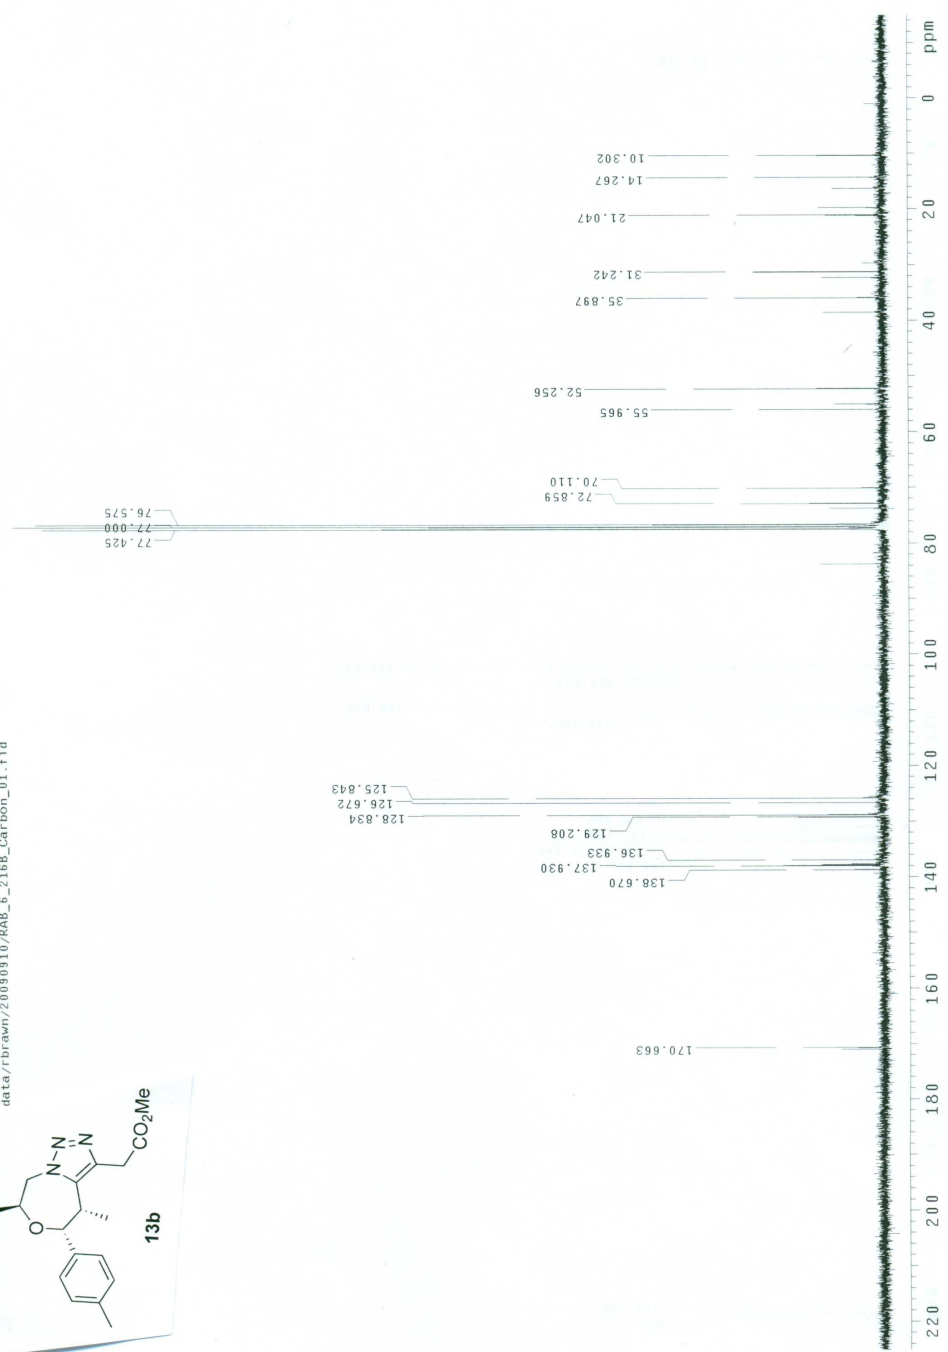

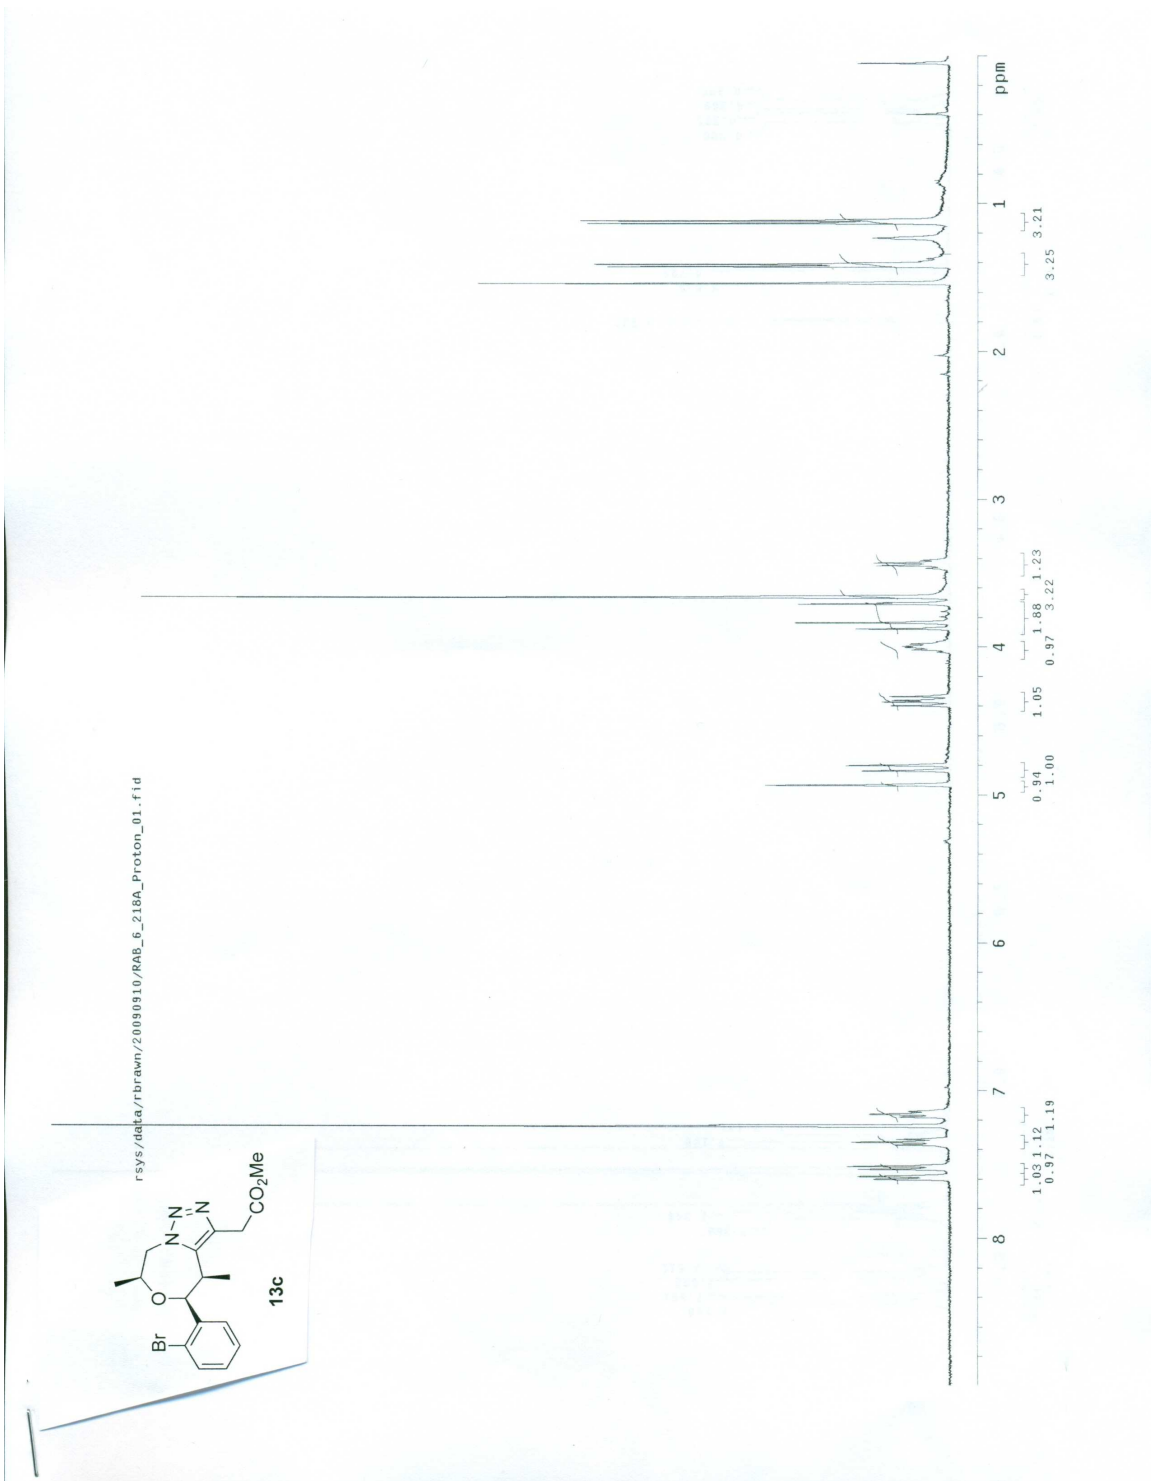

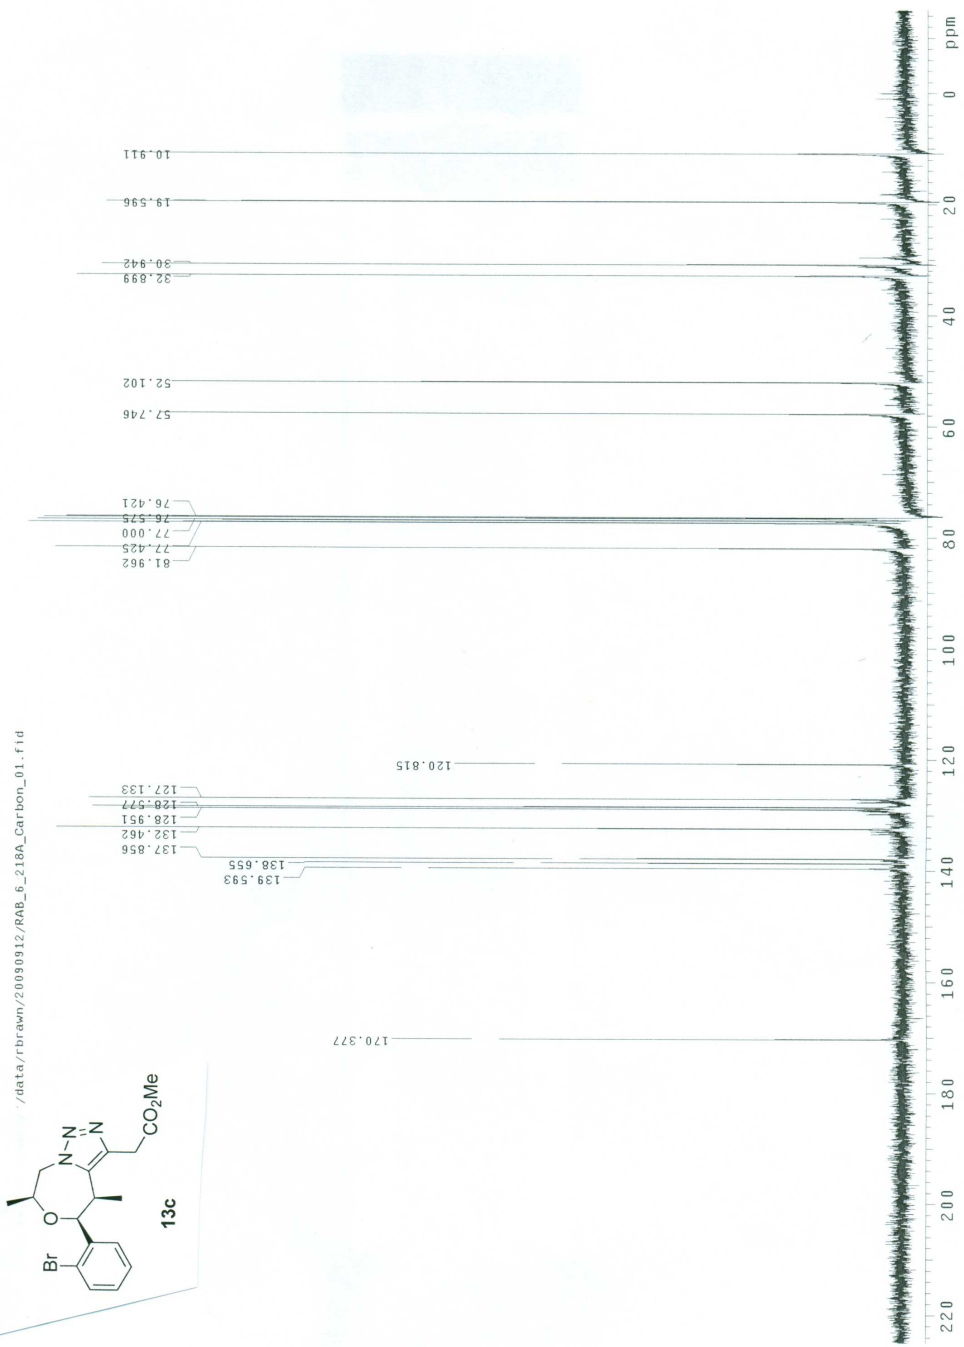

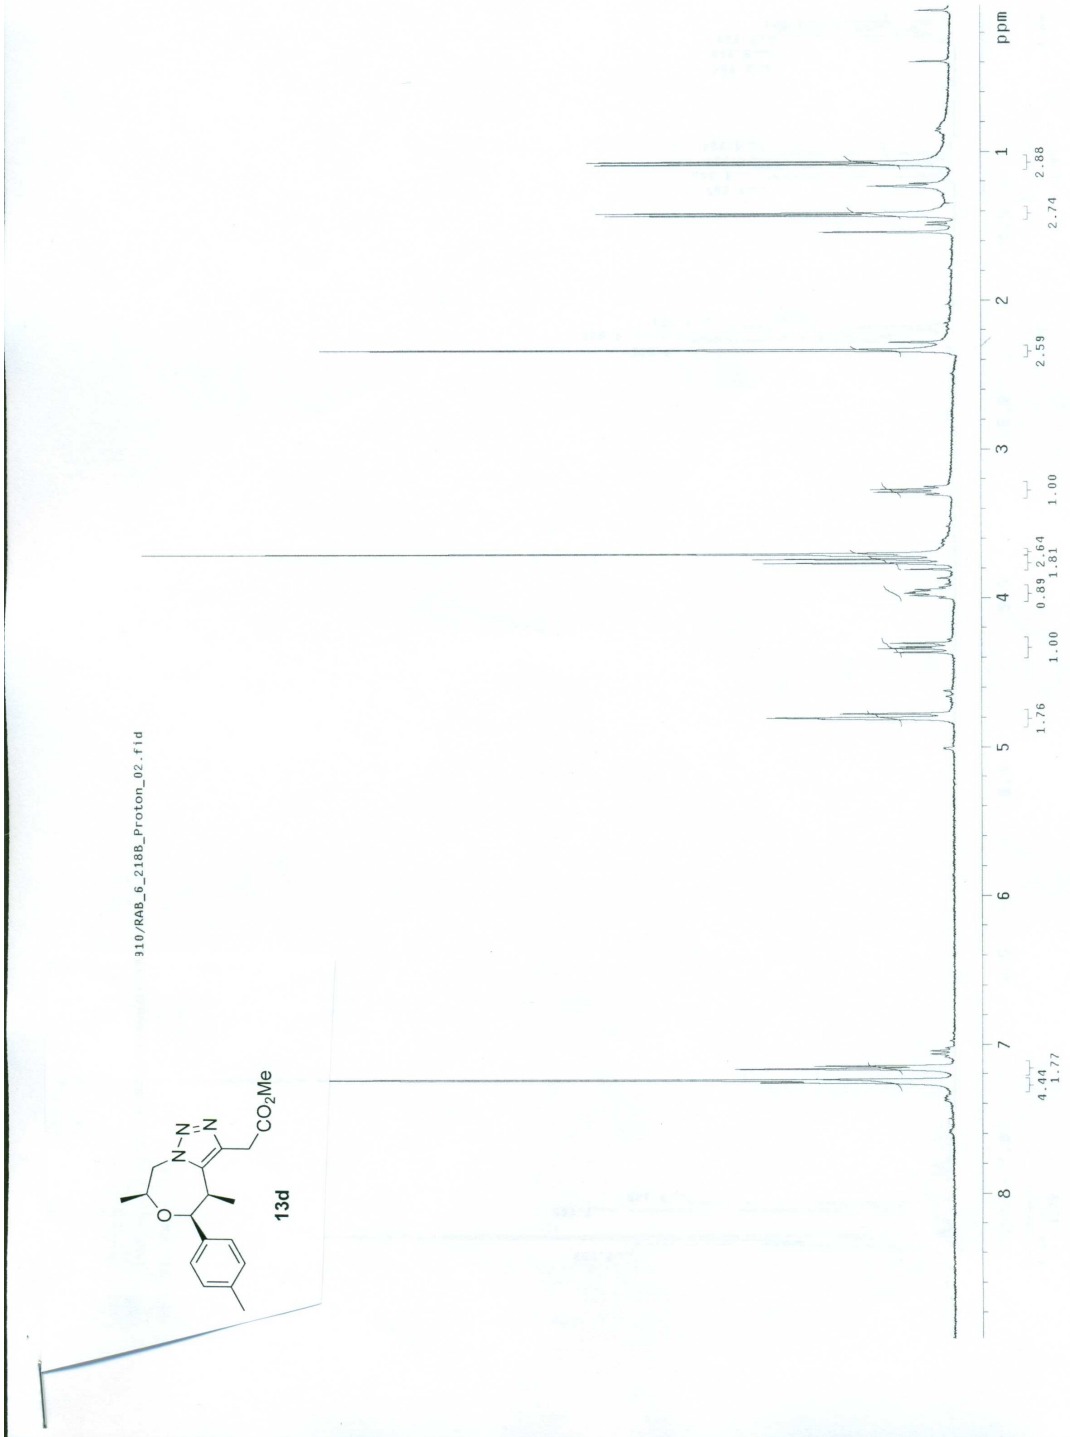



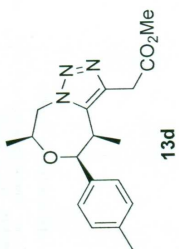

0912/RAB\_6\_2188\_Carbon\_01.f1d

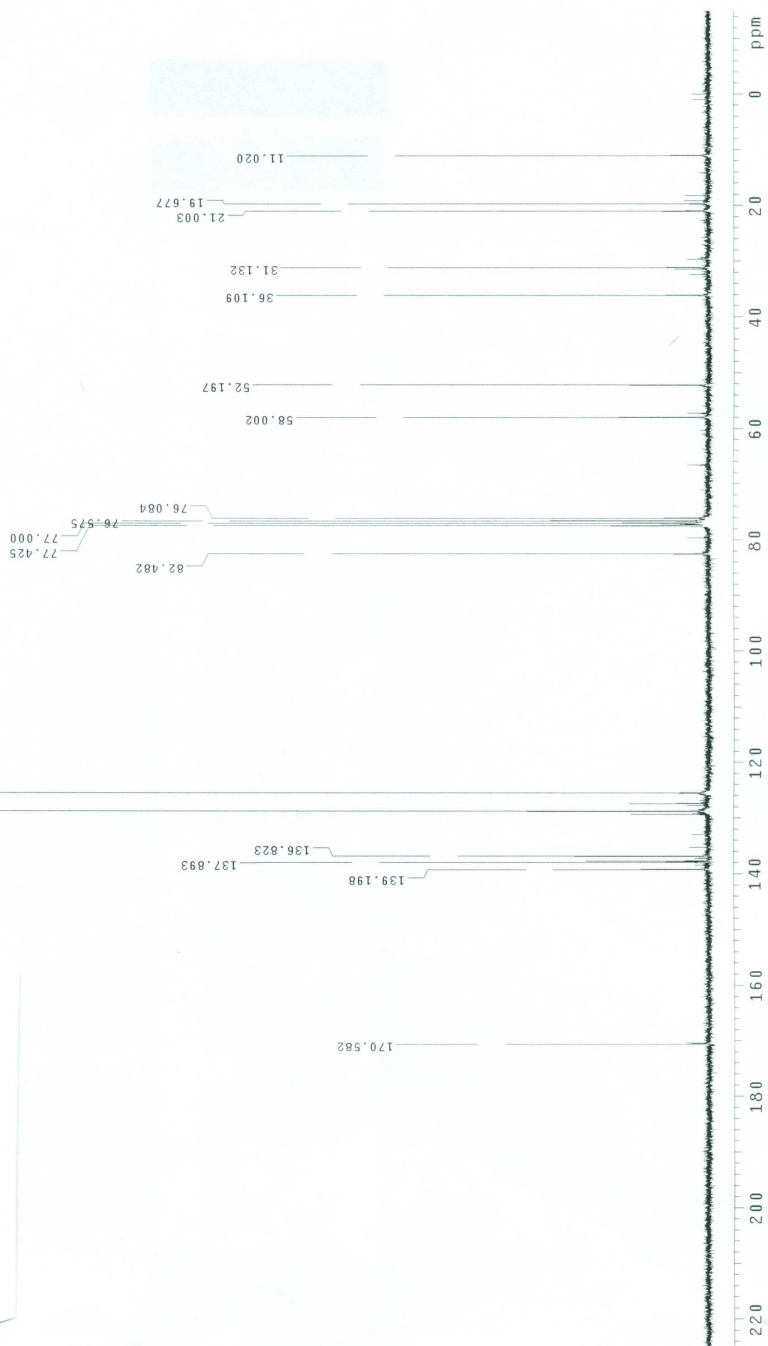

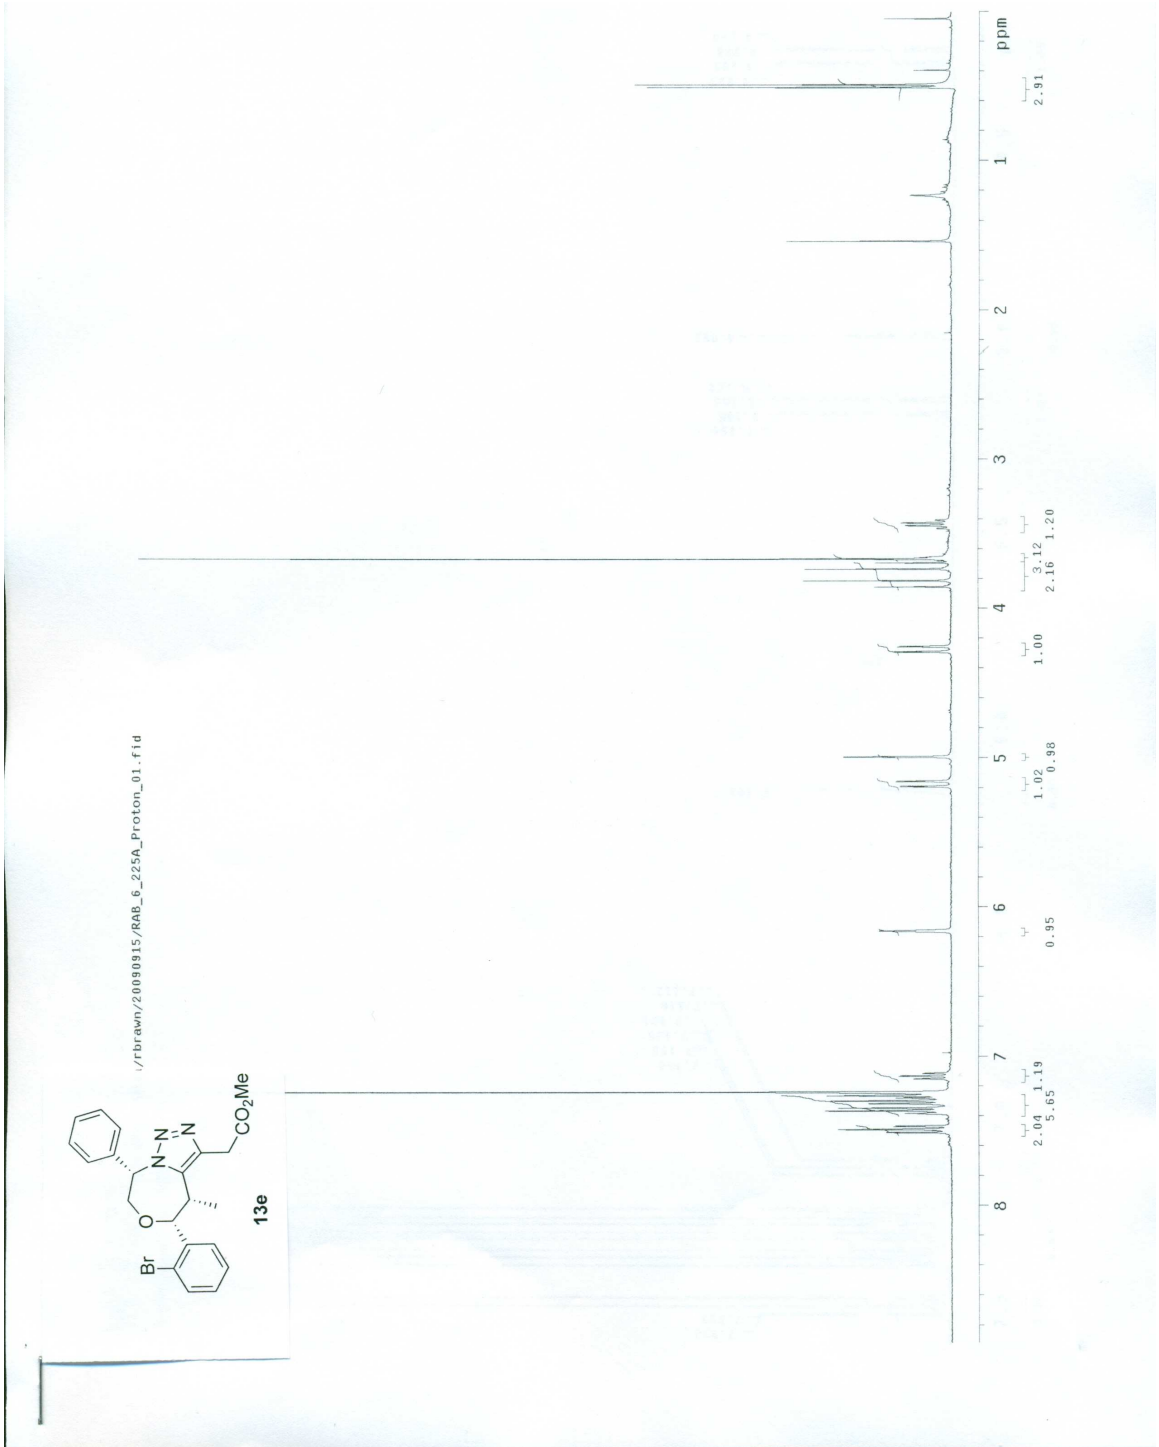

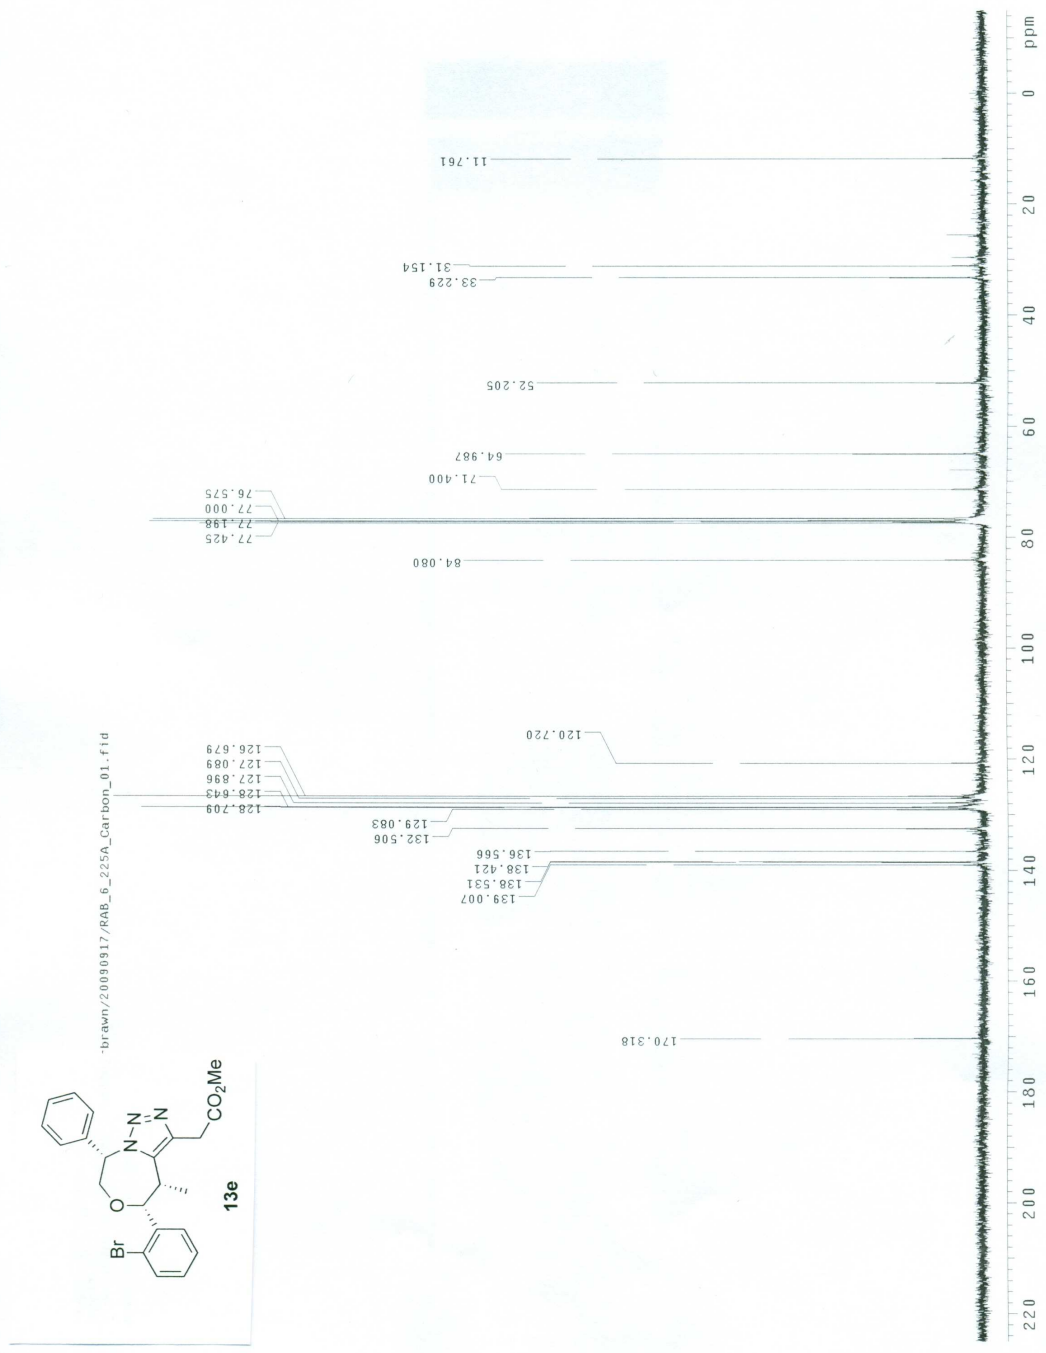

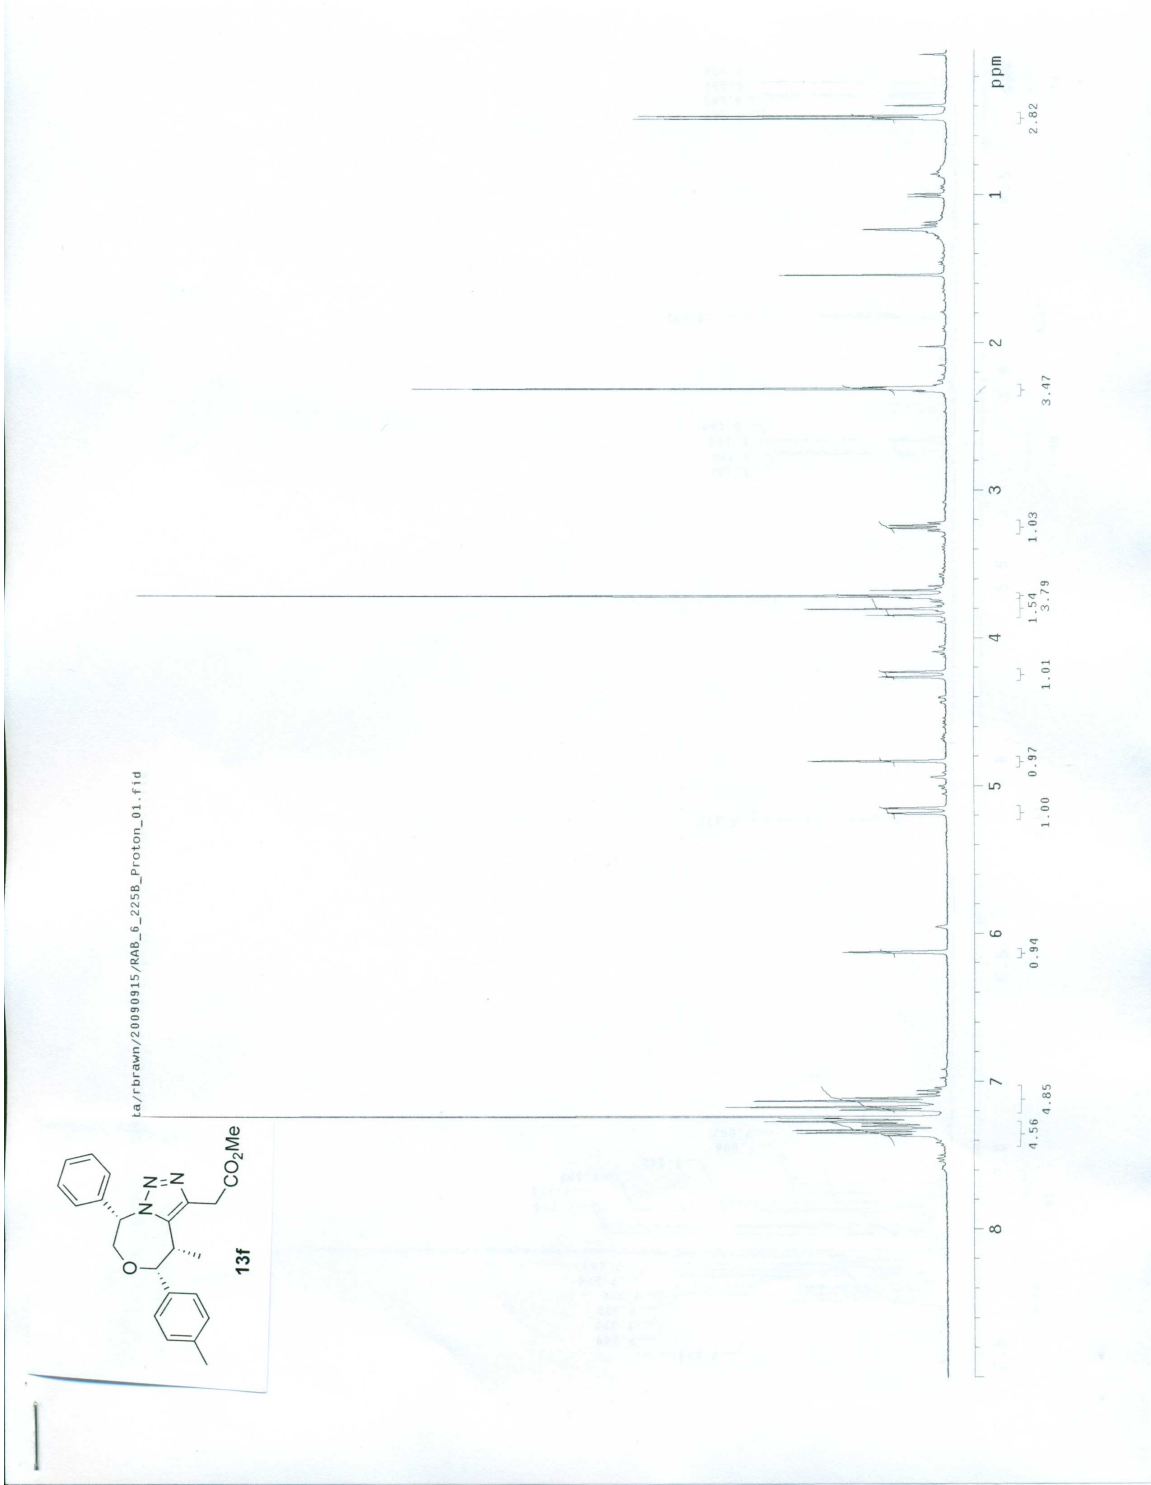

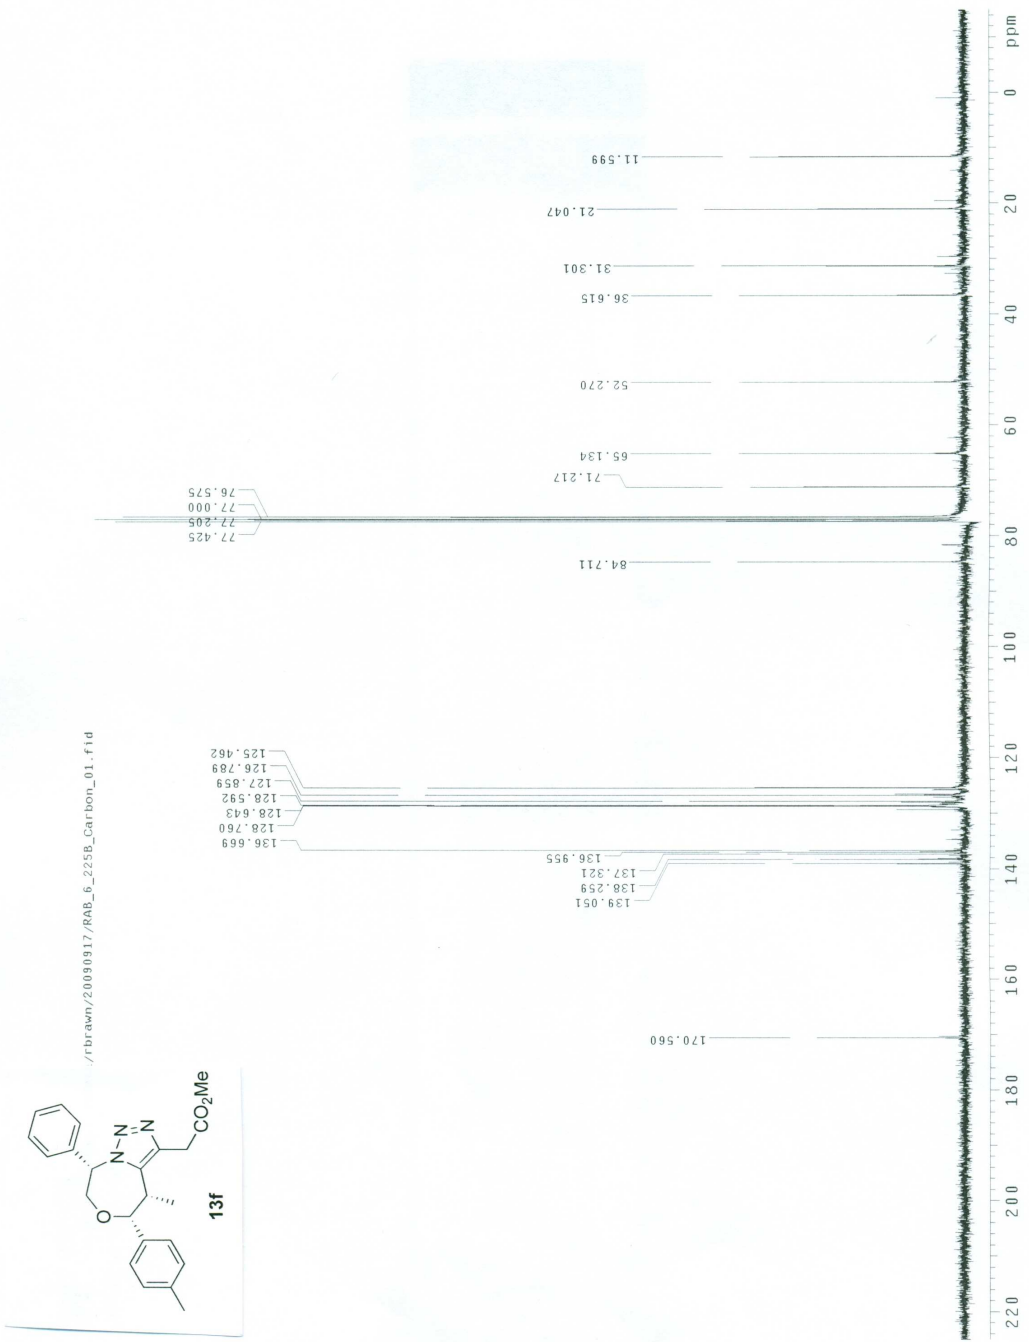

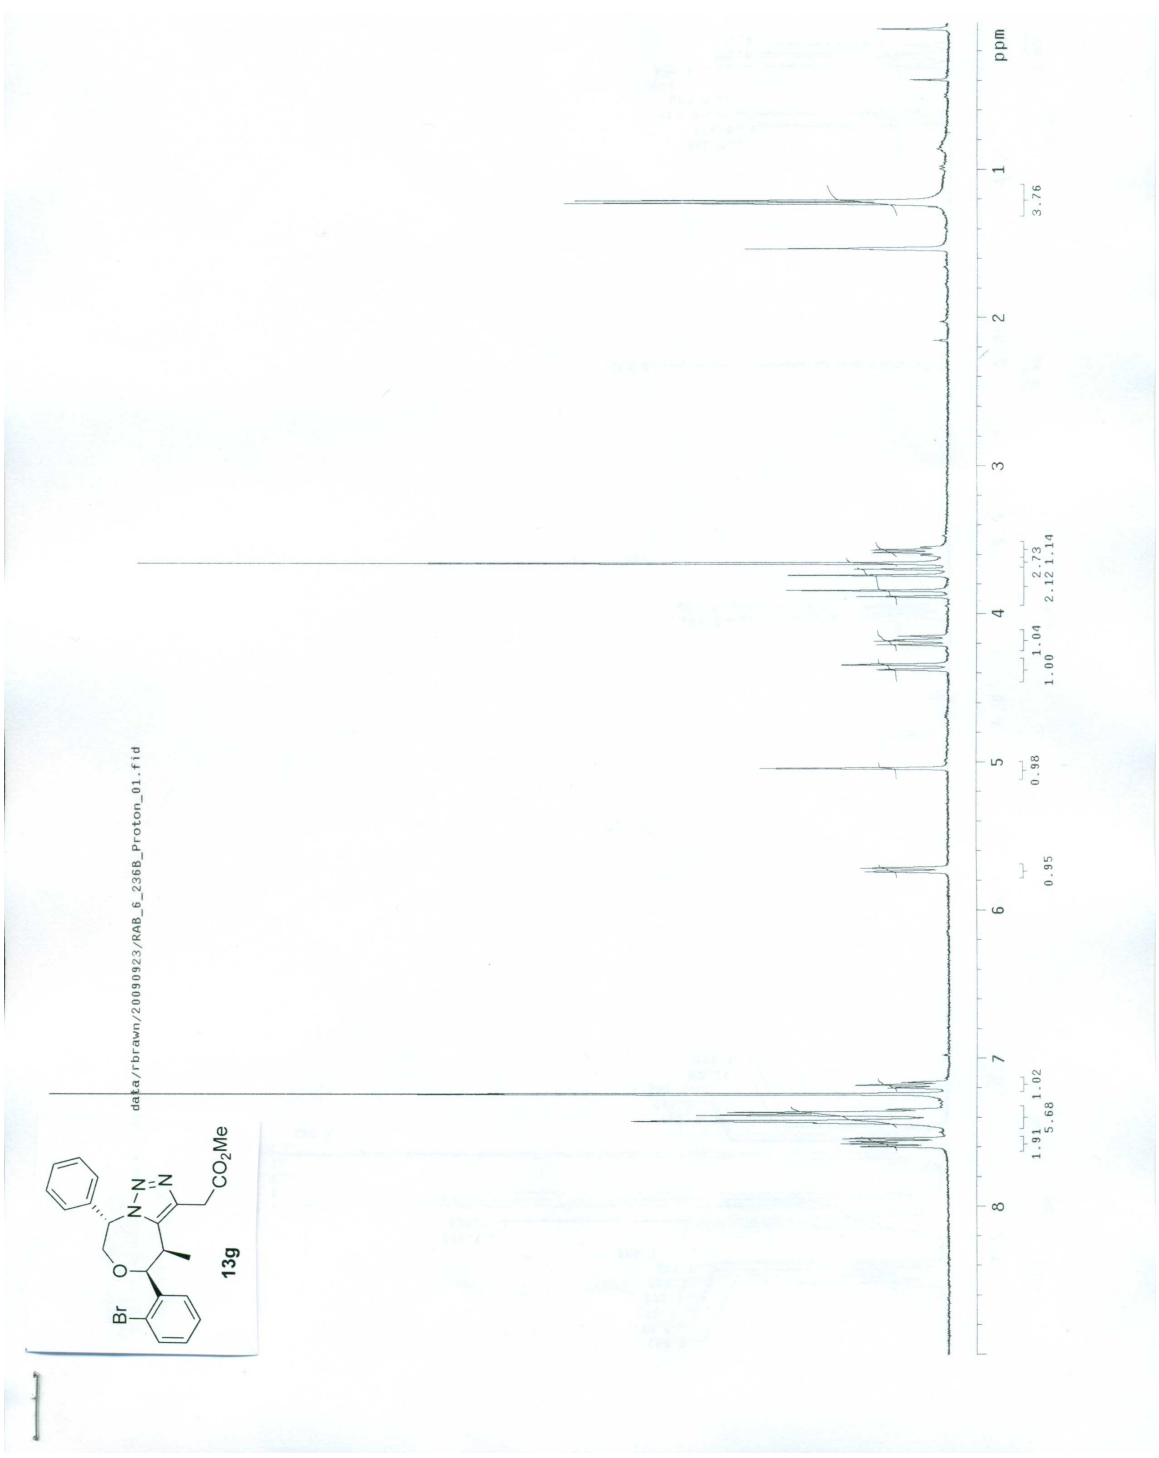

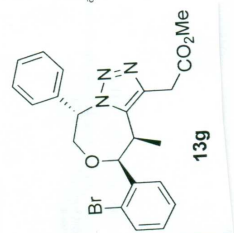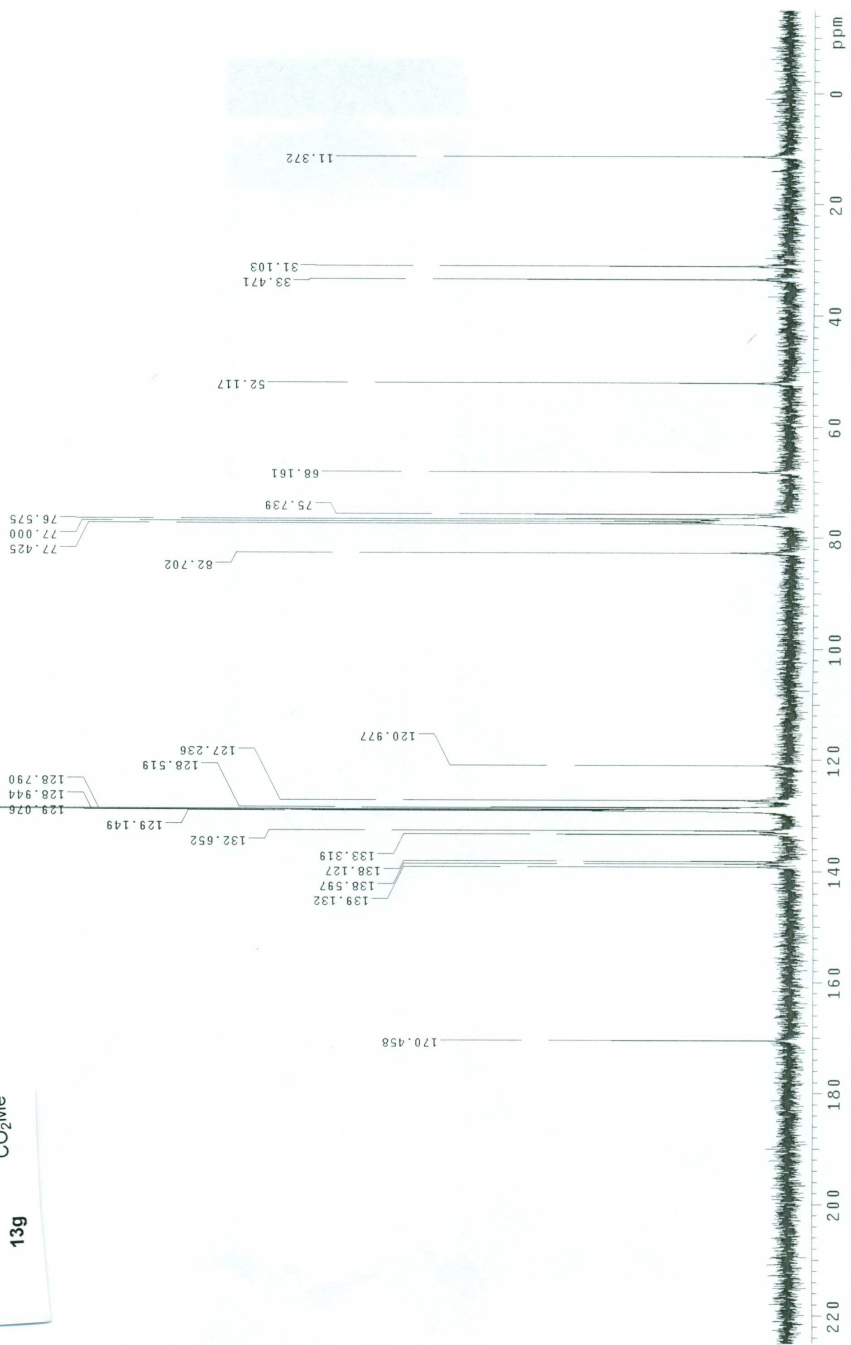

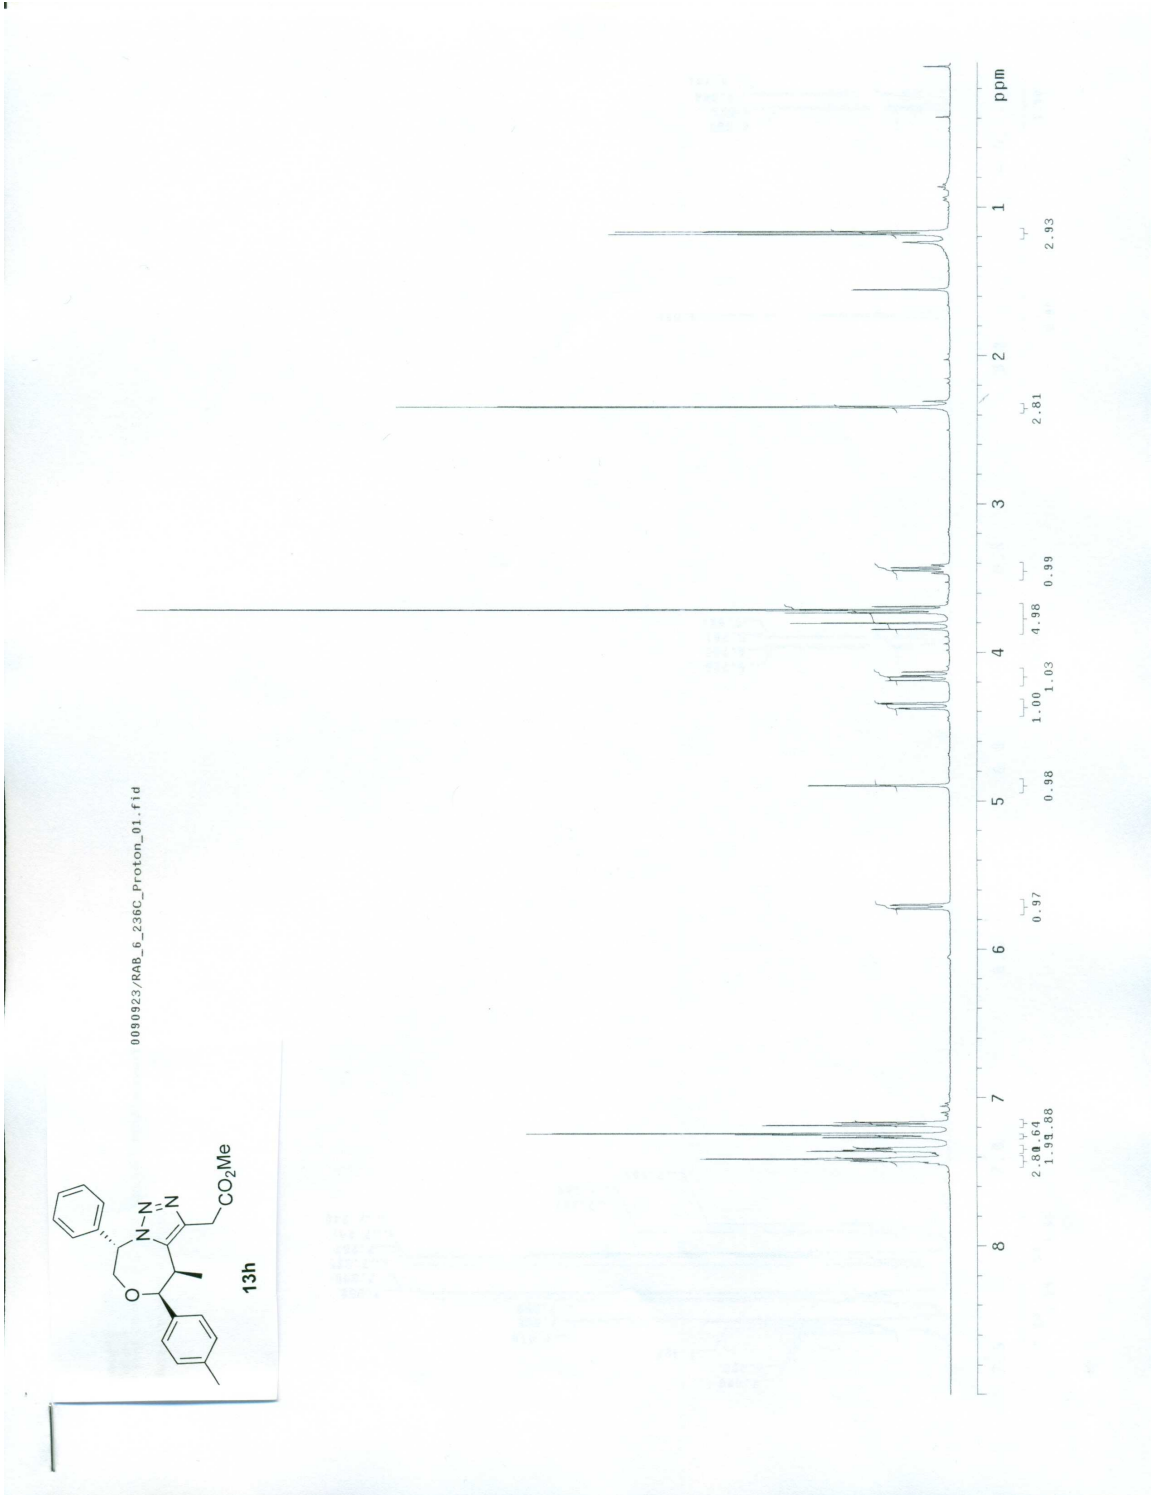



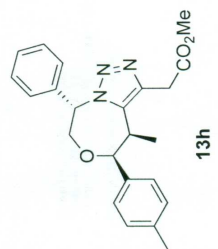

1/20090925/RAB\_6\_236C\_Carbon\_01.Fid

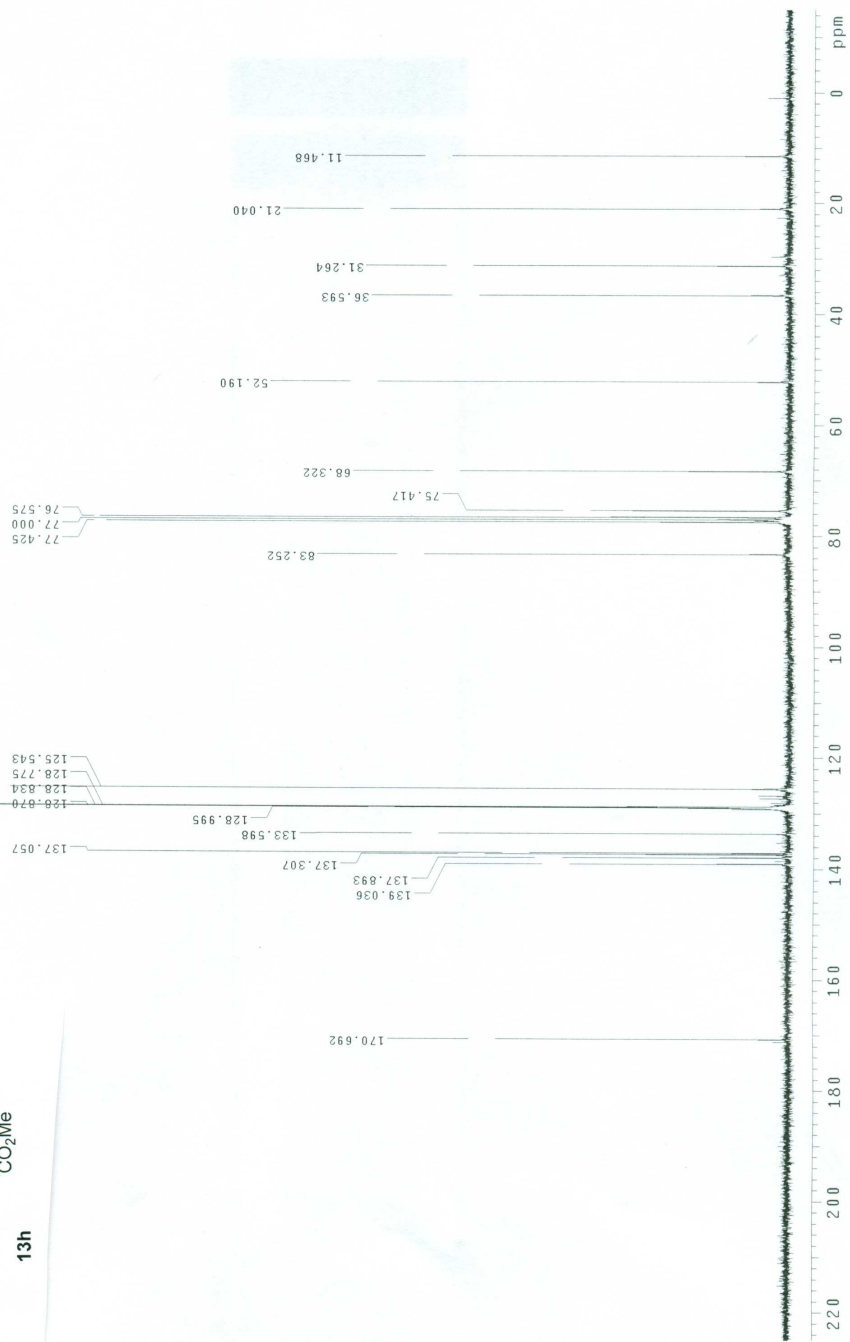

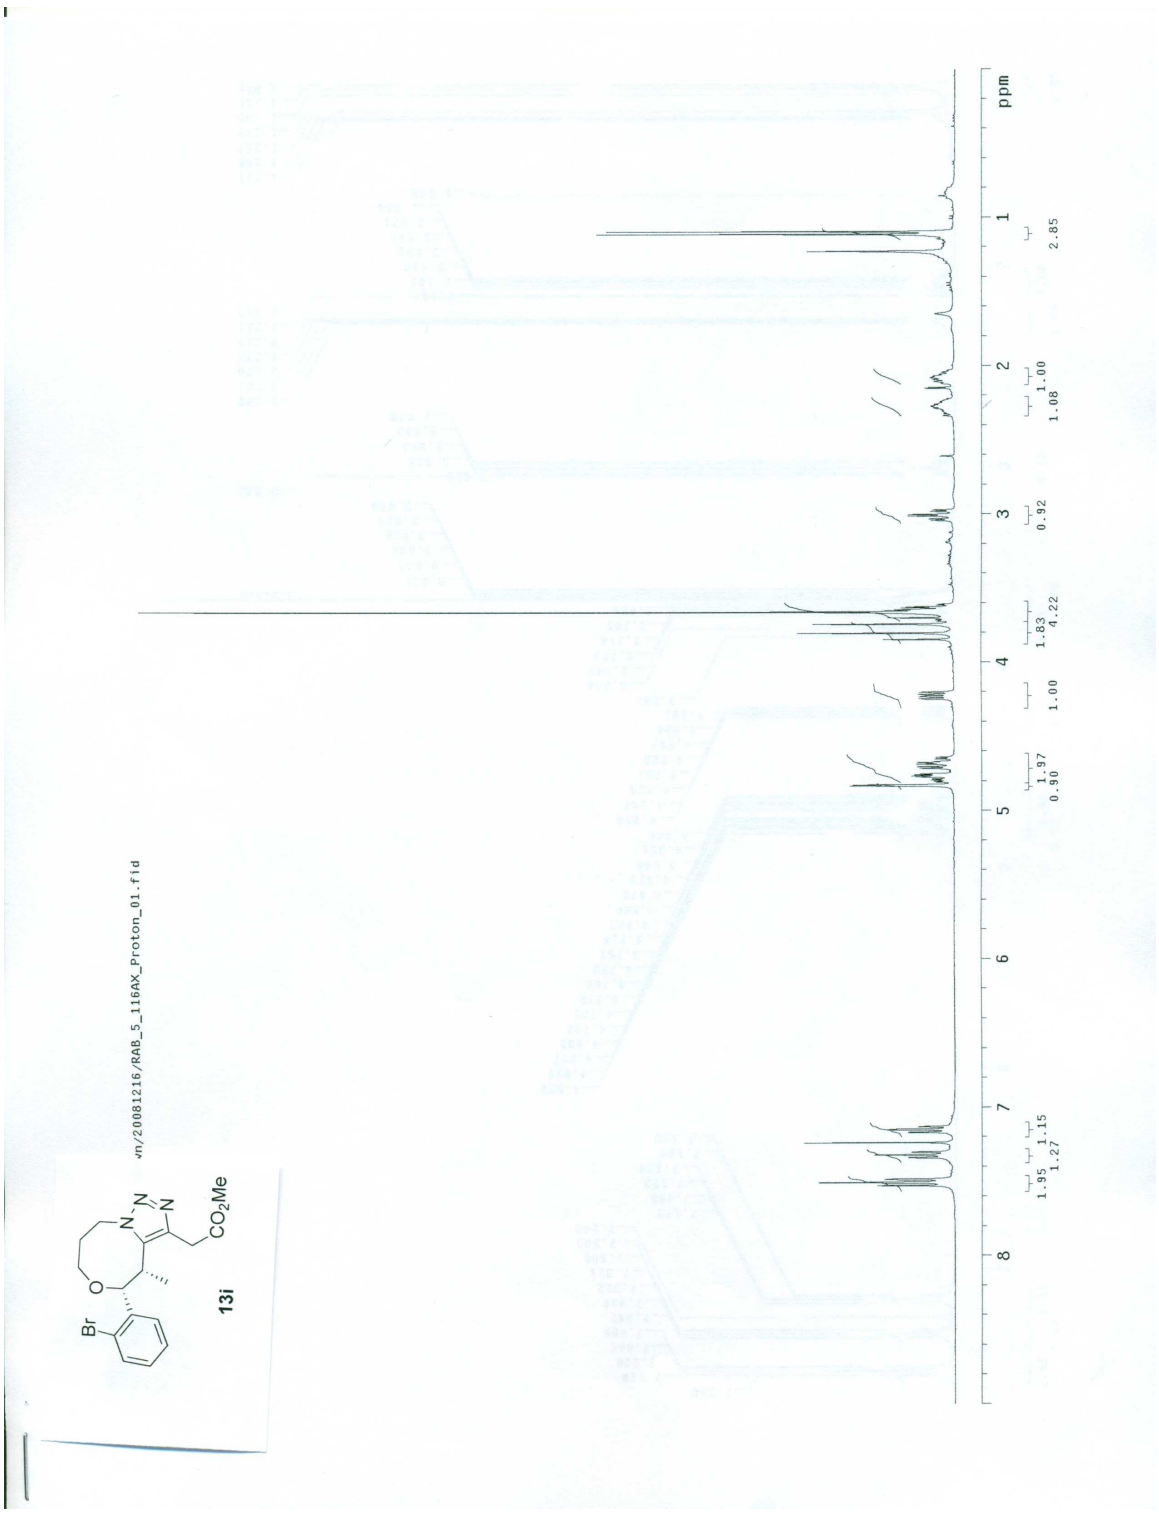

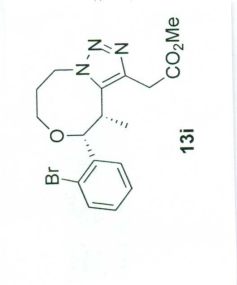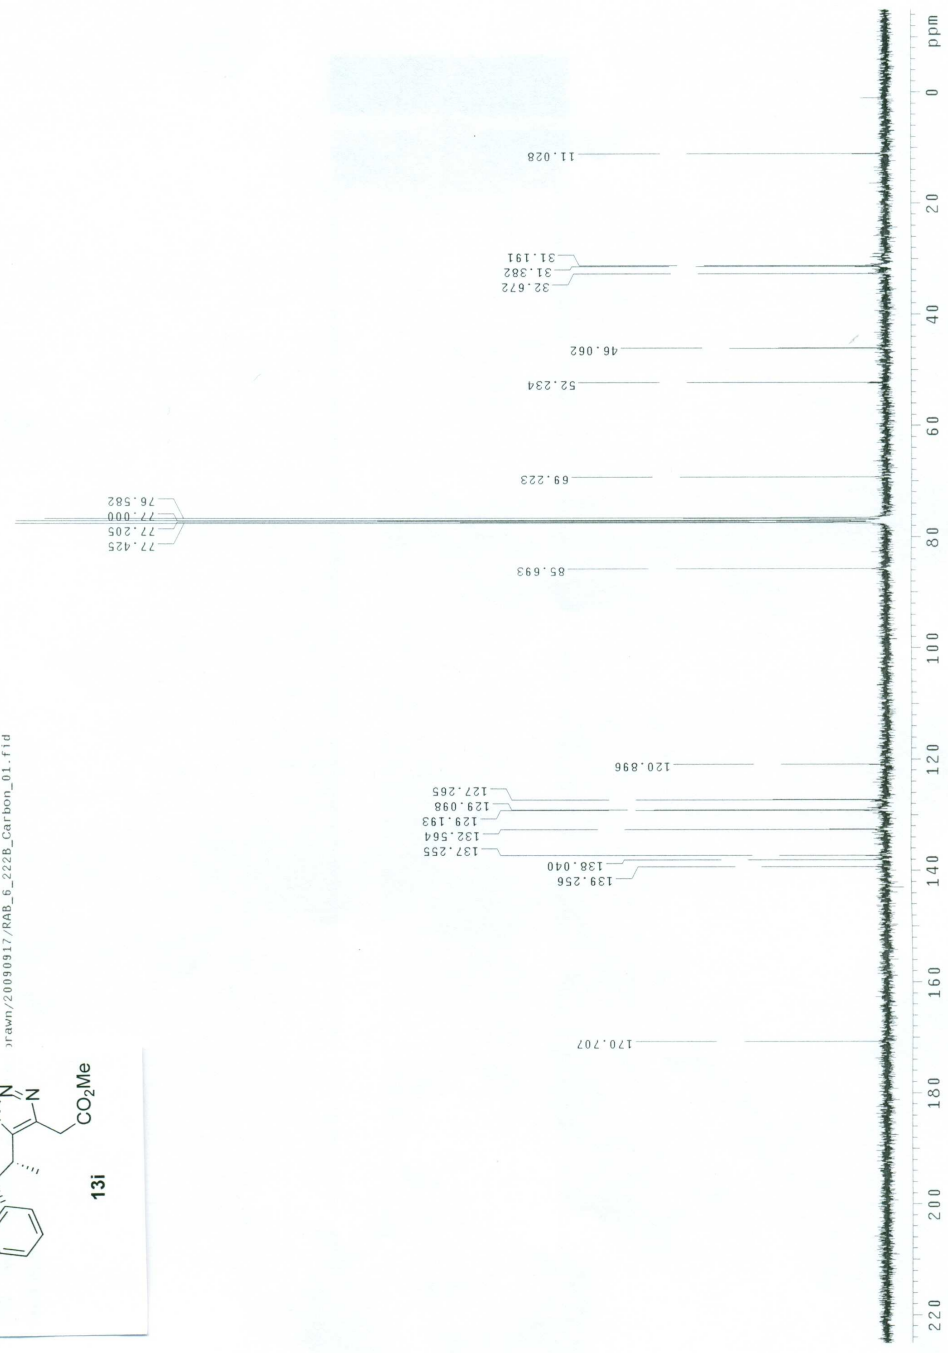

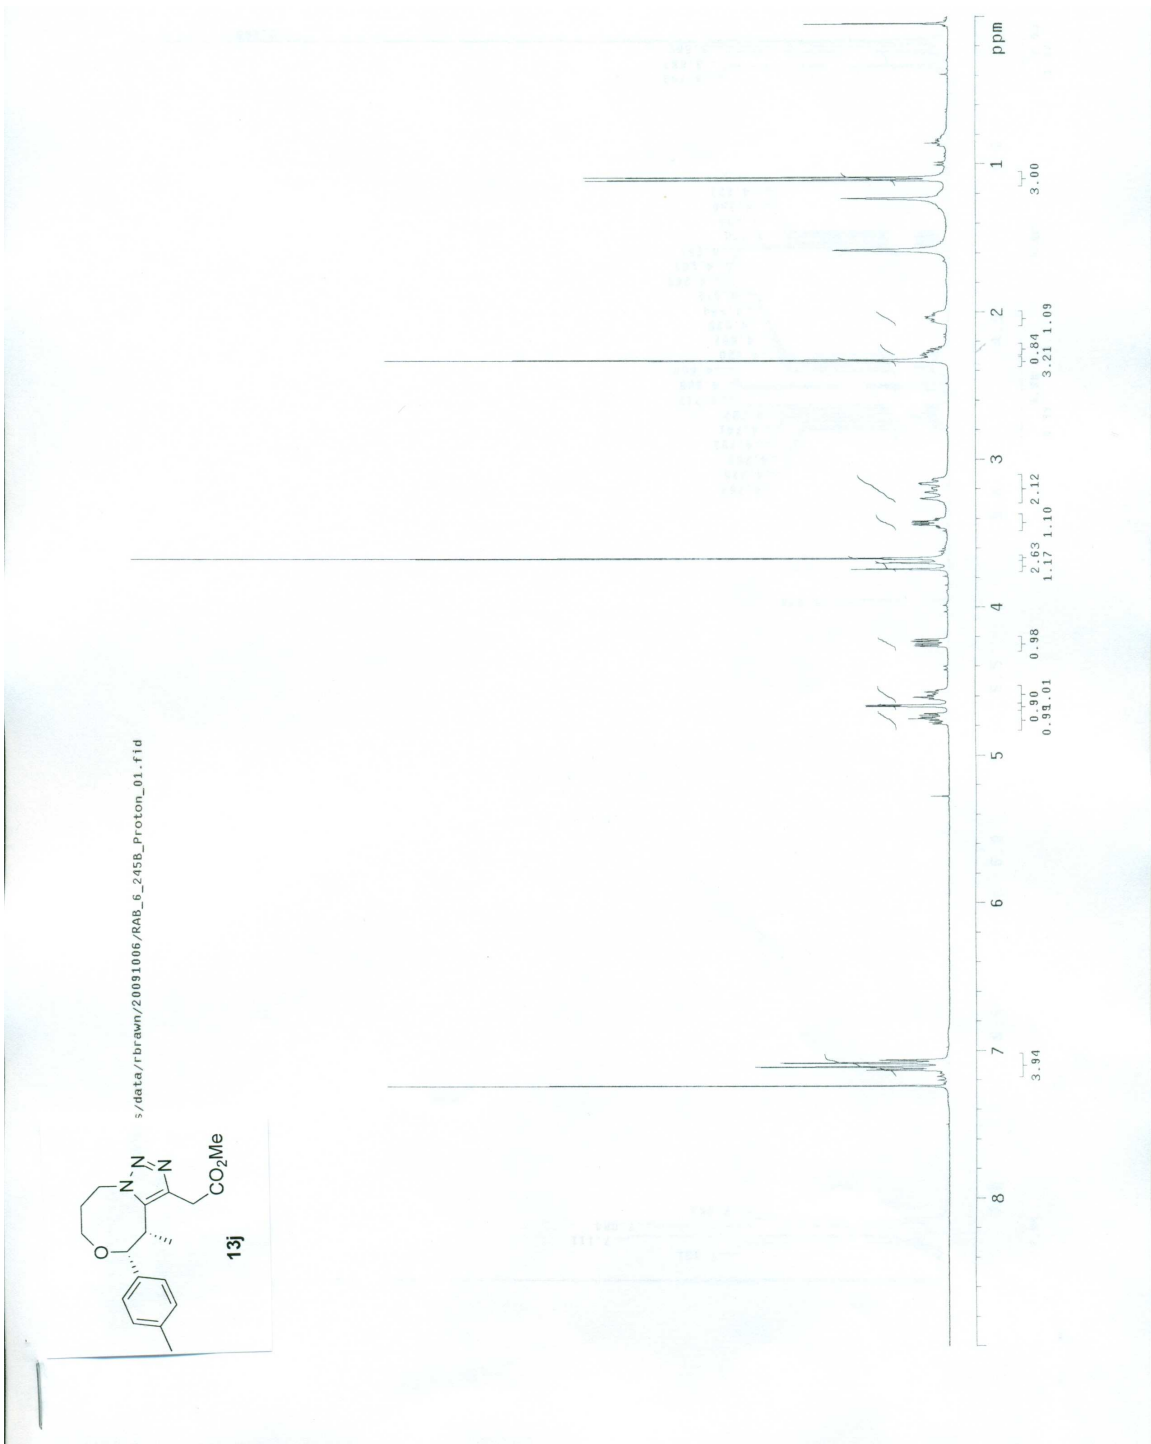

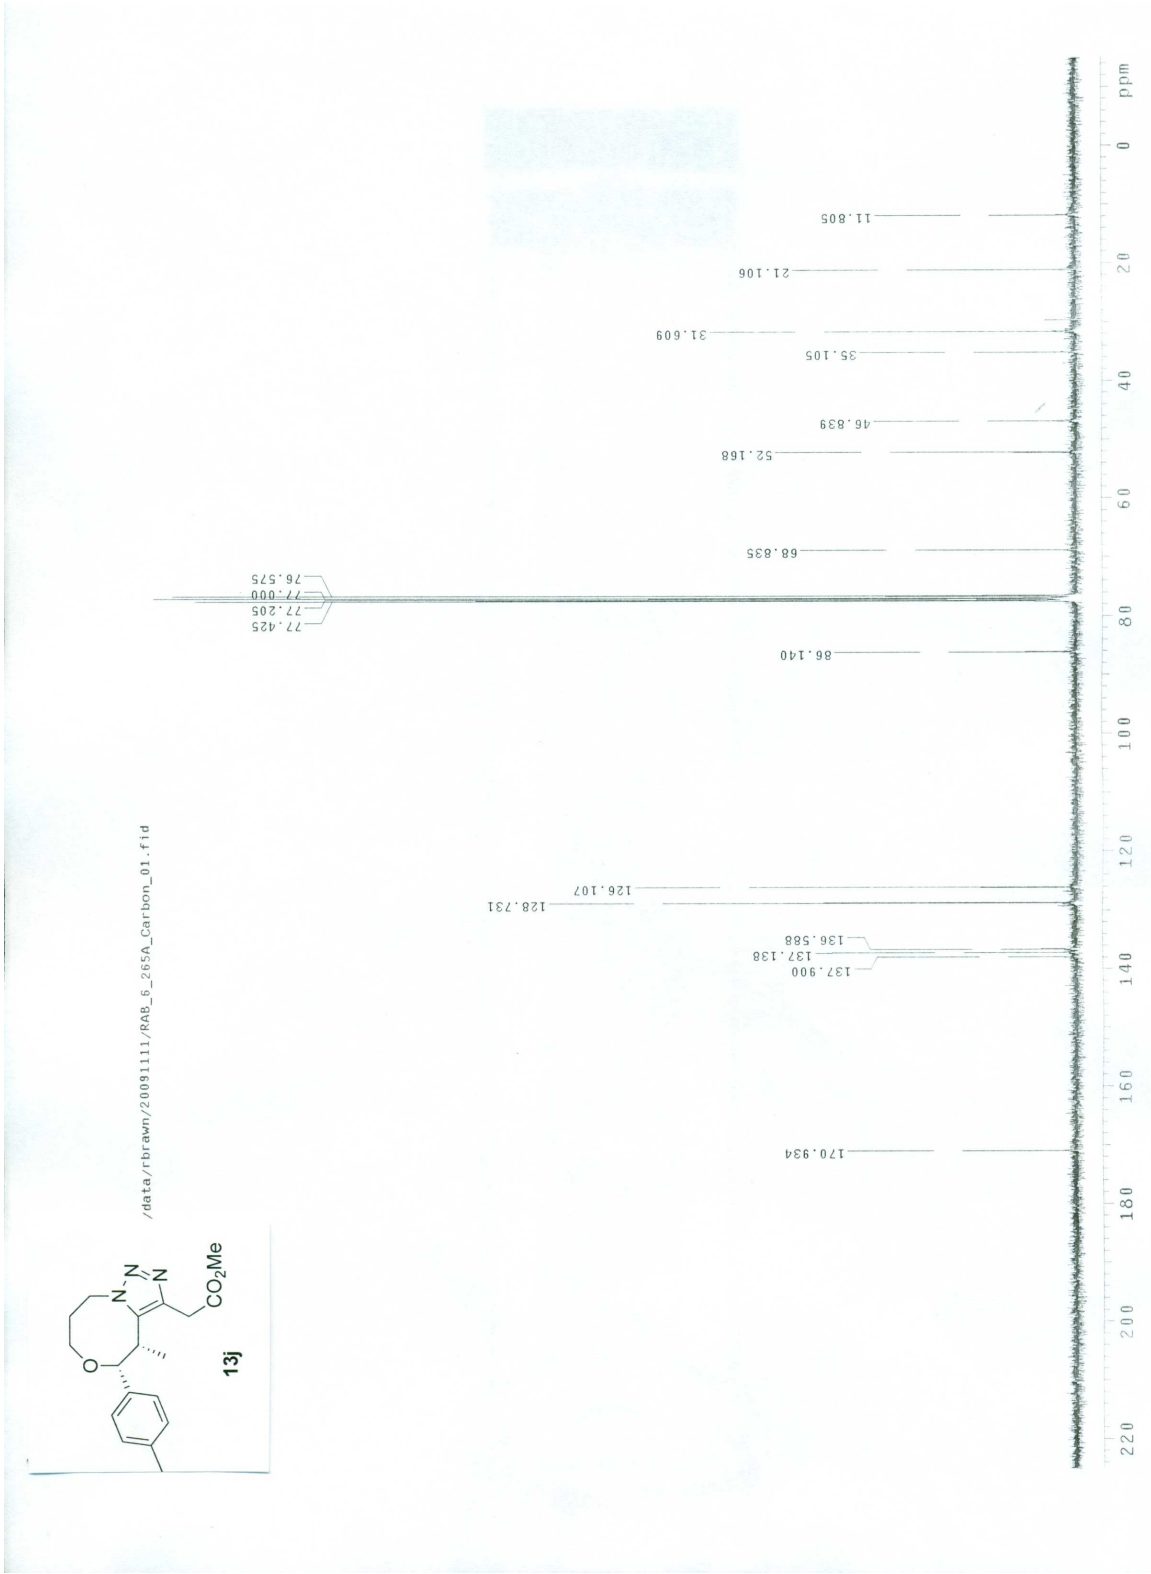

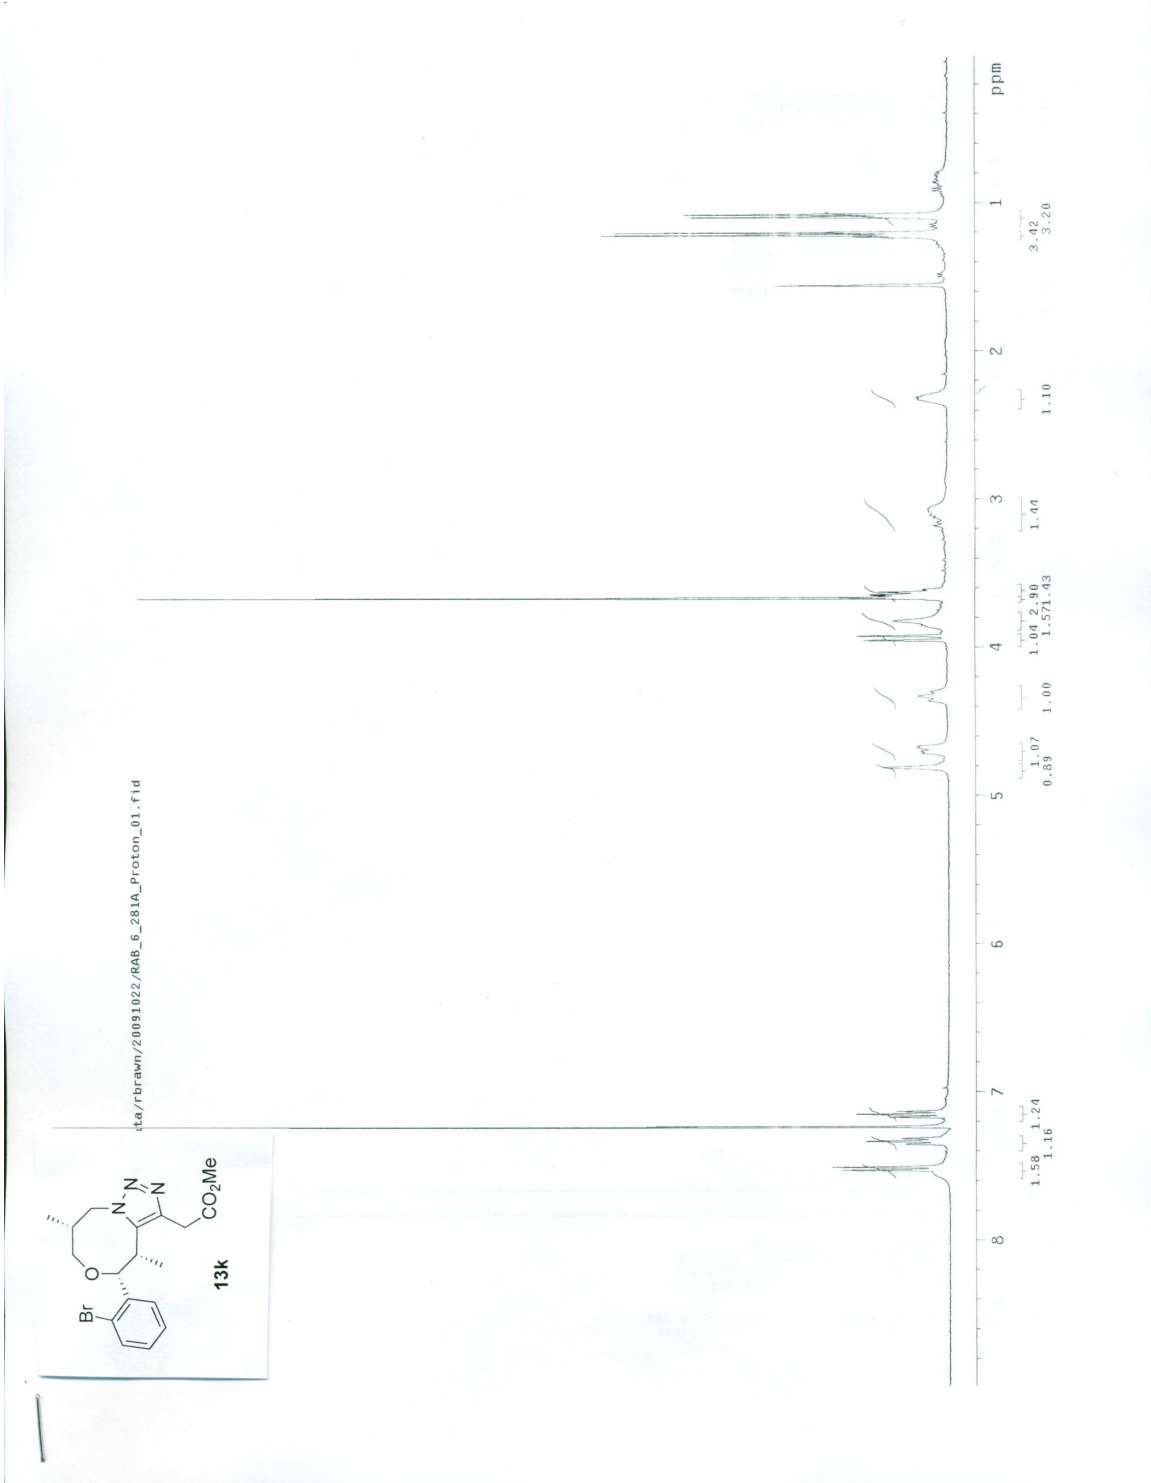

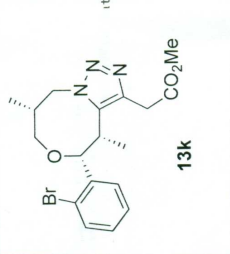

ite/fbrown/20091024/RAB\_5\_281A\_Carbon\_01.f1d

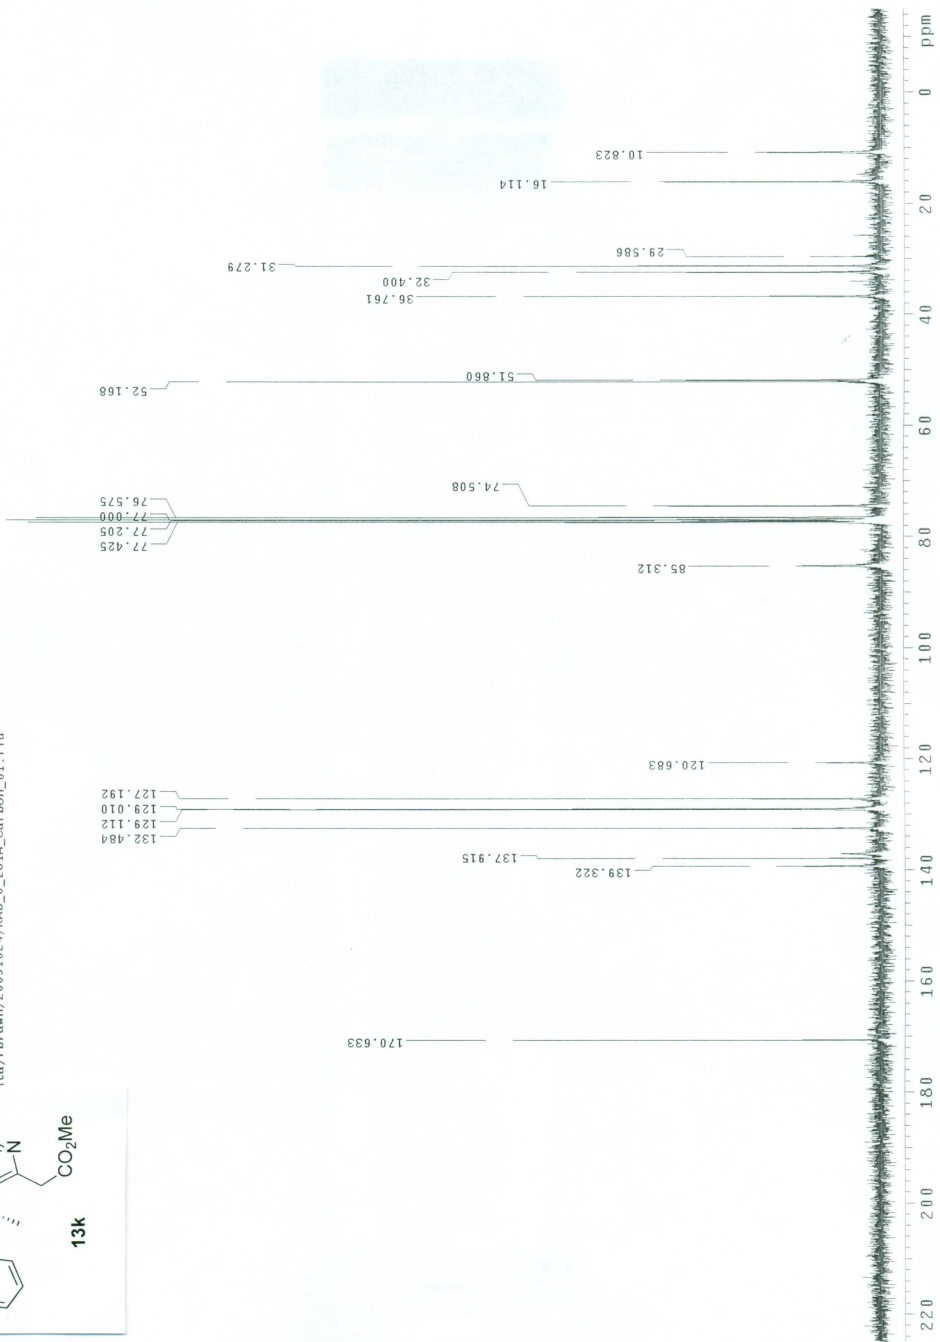

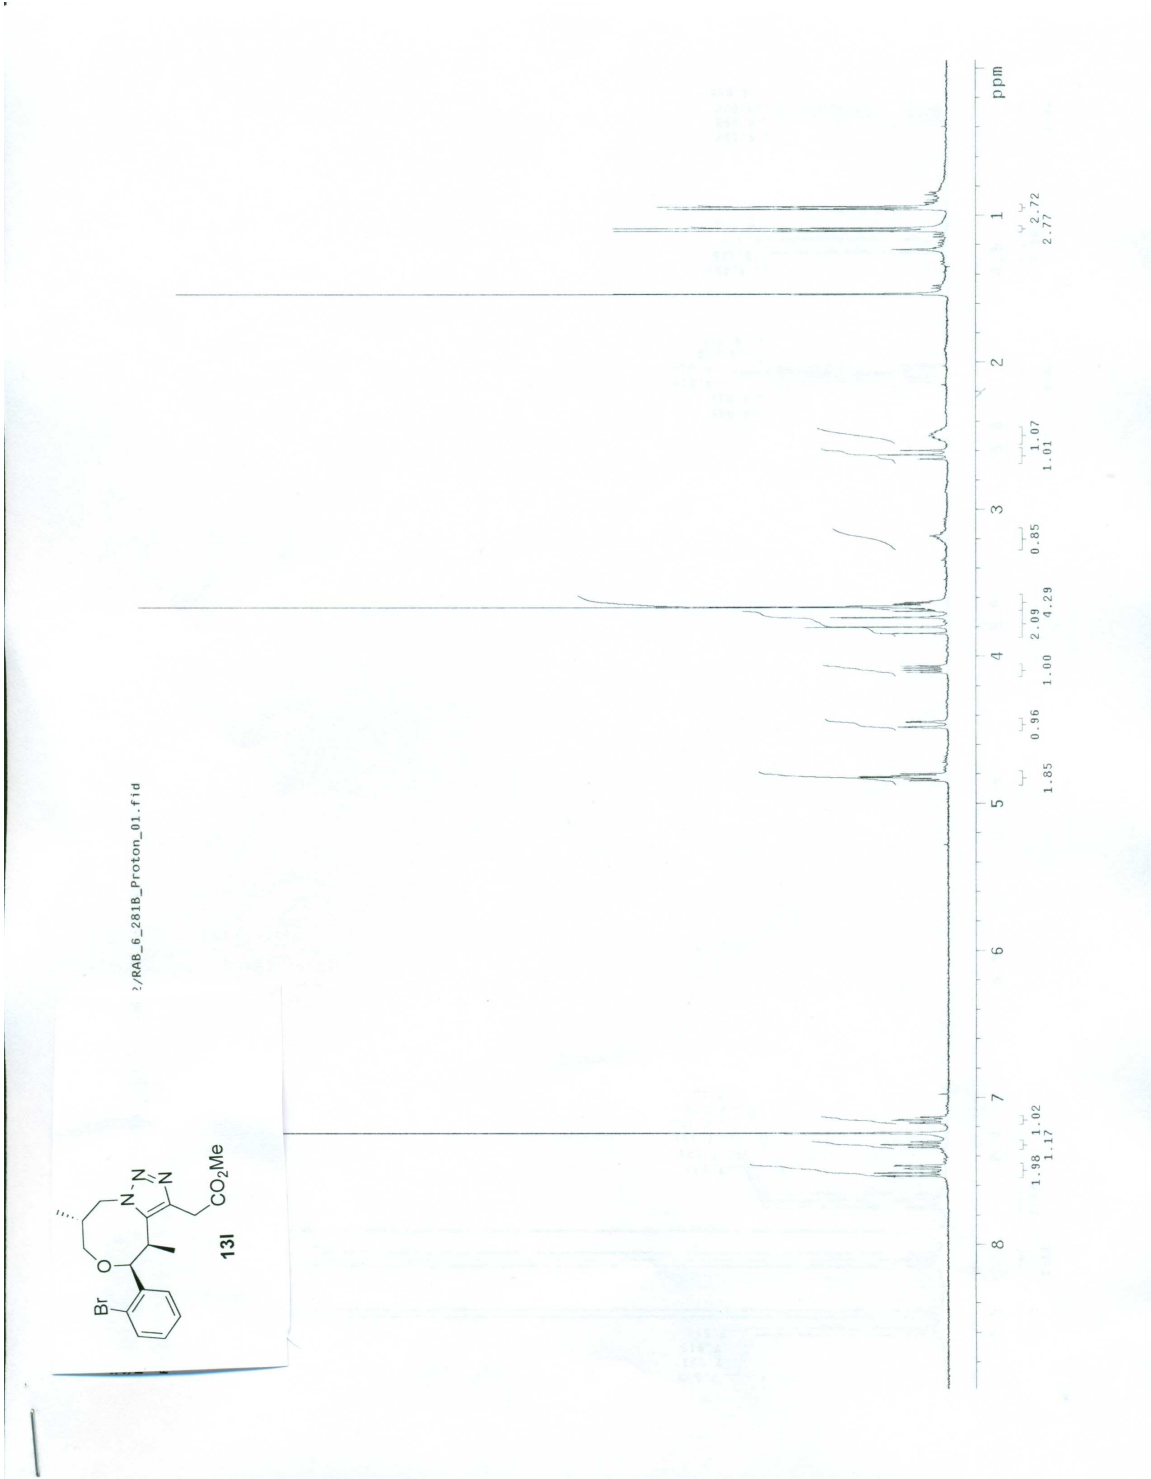



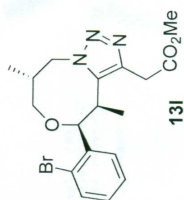

024/RAB\_6\_281B\_Carbon\_01.f1d

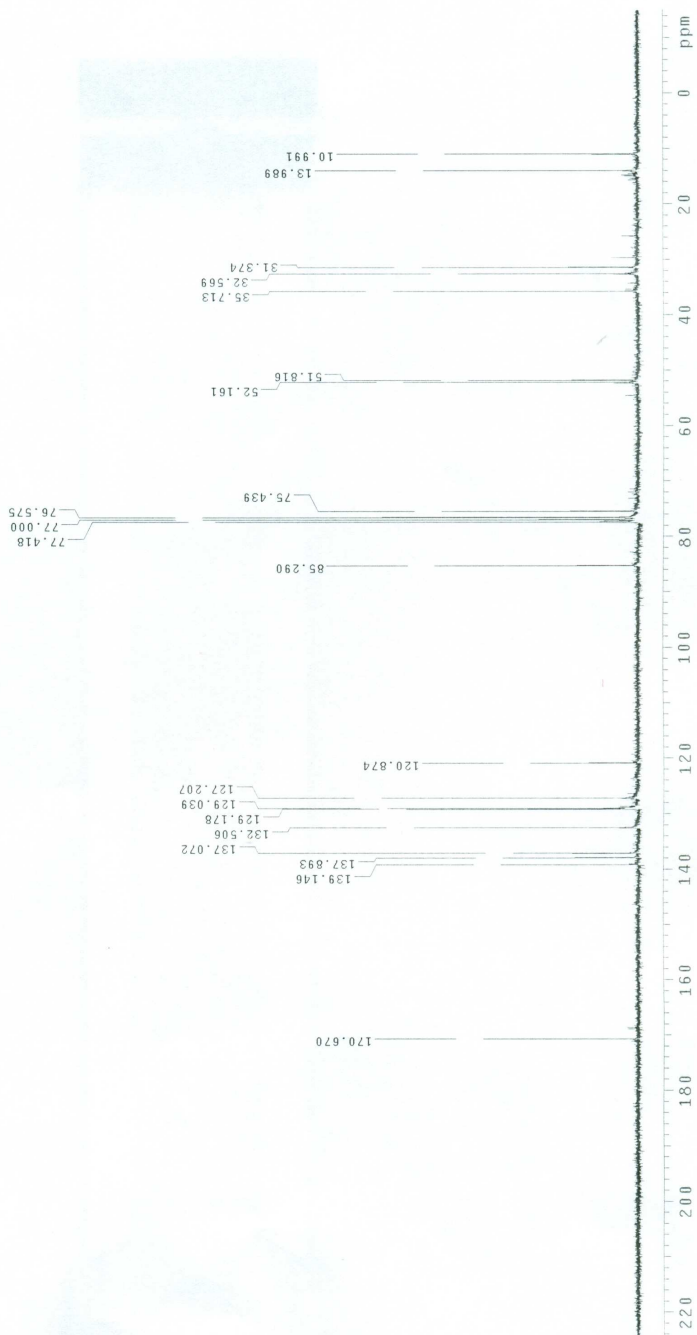

Supplement: NIHMS166168-supplement-3_si_003.pdf [file NIHMS166168-supplement-3_si_003.pdf]
